# Supplementary material for: Association Mapping and Expression Analysis of the Genes Involved in the Wood Formation of Poplar
Source: Int J Mol Sci. 2023 Aug 10;24(16):12662. doi: 10.3390/ijms241612662 (PMC10454019; doi:10.3390/ijms241612662)
Supplement: Supplementary file 1 [file ijms-24-12662-s001.zip]

Archive with 6 entries (6 files):
- captions.pdf
- Figure S1. The number of indels within 1Mb window size.jpg
- Figure S2. The number of SNPs within 1Mb window size.jpg
- Figure S3. Alternative splicing sites.jpg
- Figure S4. Expression of CL290 and CL33.jpg
- Supplementary Tables S1--S10.xlsx
