# Supplementary material for: Association Mapping and Expression Analysis of the Genes Involved in the Wood Formation of Poplar
Source: Int J Mol Sci. 2023 Aug 10;24(16):12662. doi: 10.3390/ijms241612662 (PMC10454019; doi:10.3390/ijms241612662)
Supplement: Supplementary file 1 [file ijms-24-12662-s001.zip › Supplementary Tables S1--S10.xlsx]

## Sheet: Table S1
Table S1. Shapiro-Wilks test in 8 wood property traits.
	Statistical Value	Df	P-value
FL (mm)	0.986355	66	0.684904
FW (μm)	0.98655	66	0.695919
DWT (μm)	0.977421	66	0.270883
CLD (μm)	0.979917	66	0.360838
AD (g/cm³)	0.977005	66	0.257939
BD (g/cm³)	0.981574	66	0.432648
DBH (cm)	0.978244	66	0.298189
H (m)	0.959712	66	0.0510854

## Sheet: Table S2
Table S2. Populus clones re-sequencing raw reads, clean reads, mapping reads, raw depth, clean depth, and mapping depth.
Sample	Raw reads	Clean reads	mapping reads	Raw depth	Clean depth	Mapping ratio
I-45	212307930	210409496	93443309	53.9774	53.4121	0.888204
I-69	205533428	203819202	89036717	52.0063	51.4984	0.873683
N1	36769812	36247406	16263804	9.12184	8.98793	0.897378
N2	55181840	54625110	24977103	13.9305	13.7748	0.914492
N3	36551000	35785996	16177664	8.76116	8.57229	0.904134
N4	41018896	40805118	18874526	9.7275	9.67084	0.925106
N5	30426068	30195346	13853033	7.21544	7.15096	0.917561
N6	44775262	44493418	20529758	10.7325	10.6574	0.922822
N7	52095172	51784824	23929810	12.487	12.4034	0.924202
N8	41868844	41298634	18621293	10.6279	10.4794	0.901787
N9	26222806	24809464	11680873	6.29651	5.99304	0.941647
N10	38139508	37104424	15950196	8.94741	8.69066	0.859746
N11	39023298	38758480	17805496	9.25425	9.18264	0.918792
N12	31182714	30951696	14174848	7.39488	7.3287	0.915934
N13	39387774	38732342	17426488	9.34068	9.17877	0.899842
N14	40706440	40004552	17739475	9.5496	9.36752	0.886873
N15	36399032	35787748	16437997	9.14979	8.99134	0.918638
N16	41011586	40451672	18137123	9.72577	9.58737	0.89673
N17	45283254	44742066	20490946	10.7388	10.5986	0.915959
N18	46892760	46603396	21514344	11.3596	11.2805	0.923295
N19	41454738	41133228	18986322	9.72515	9.64323	0.923162
N20	35110858	34531092	15517592	8.2369	8.09643	0.898761
N21	36924598	36626178	16865197	8.66239	8.57395	0.920937
N22	55574364	55244296	25545638	13.4627	13.3727	0.924824
N23	34352726	34118784	15915719	8.23424	8.17073	0.932959
N24	39614572	38964878	17997714	9.39447	9.22537	0.923792
N25	39037386	38808250	17695769	9.15805	9.09887	0.911959
N26	31429726	31199880	14491913	7.37331	7.31441	0.928972
N27	47563212	47128676	21718404	11.1582	11.0477	0.921664
N28	41849170	41023996	18451712	9.9244	9.72088	0.899557
N29	43777714	42795372	19207283	10.2701	10.0337	0.897634
N30	43849282	43574464	19987980	10.2869	10.2161	0.917417
N31	53781780	53307284	24853536	12.8913	12.7664	0.932463
N32	46535606	46222796	21408656	11.0358	10.9531	0.926325
N33	34656258	34164332	15278555	8.45944	8.33861	0.894416
N34	35102156	34597538	15692172	8.69059	8.56408	0.907127
N35	37110328	36576944	16456047	8.80059	8.67029	0.899804
N36	41766936	41040926	17764460	9.79839	9.62273	0.865695
N37	48028772	47631728	22095314	11.5123	11.4078	0.927756
N38	40267992	39965546	18214129	9.54942	9.47116	0.911492
N39	36241746	35616852	15992310	8.83652	8.67907	0.898019
N40	45551844	45165104	20928548	11.0348	10.9308	0.926757
N41	39783944	38983382	17581422	9.63753	9.43512	0.901996
N42	33052220	32786562	15144943	7.92251	7.85303	0.923851
N43	34166662	33899356	15828727	8.27676	8.20274	0.933866
N44	37355042	36902748	16964080	9.04914	8.93177	0.919394
N45	38336220	38101170	17818432	9.18907	9.12436	0.935322
N46	41406916	40578454	18200217	10.0307	9.82333	0.897038
N47	47227738	46867882	21276209	11.4408	11.3436	0.907923
N48	51802648	50852906	23301323	12.2848	12.0369	0.916421
N49	40954038	40374952	18083800	10.1629	10.0144	0.895793
N50	52950388	52571558	24362241	12.692	12.5906	0.926822
N51	36797646	36061514	15988305	8.72644	8.54786	0.886724
N52	37692408	37158200	16765915	9.03475	8.90089	0.902407
N53	44326296	43503988	19659814	10.6249	10.4217	0.903817
N54	43579208	42919376	19519263	10.6227	10.4546	0.909578
N55	44778260	44483008	20426445	10.8474	10.7676	0.918393
N56	38146800	37489784	16732292	9.27632	9.11621	0.892632
N57	47687234	47020332	21218732	11.5521	11.3843	0.902534
N58	41821904	41057096	18653527	10.3724	10.1742	0.908663
N59	42600830	41756132	18826112	10.4413	10.2345	0.901717
N60	39500542	38861030	17668735	9.36743	9.20986	0.909329
N61	37453678	36815680	16583520	8.88202	8.72335	0.900894
N62	52238486	51909074	24149312	12.6546	12.5651	0.930447
N63	42013108	41428576	18534331	10.1775	10.0289	0.894761
N64	44153838	43386410	19904847	10.6961	10.4882	0.917561

## Sheet: Table S3
Table S3. The statistics and average (Mbp) densities of SNP and InDel on each chromosome.
Chr	Length(Mb)	SNP number	SNP frequency(SNP number/Length)	InDel number	Indel frequency(InDel number/Length)
Chr01	49.7886	1036498	20818	49285	989.886
Chr02	25.2424	523713	20747.4	28078	1112.34
Chr03	21.6786	428413	19762	23281	1073.91
Chr04	24.14	474760	19666.9	23140	958.573
Chr05	24.9811	516629	20680.8	26593	1064.52
Chr06	27.5167	574992	20896.1	30684	1115.11
Chr07	15.5614	317163	20381.4	15729	1010.77
Chr08	19.1953	362842	18902.7	22756	1185.5
Chr09	12.9874	253994	19557	16507	1271
Chr10	22.7991	420956	18463.7	25640	1124.61
Chr11	19.2888	379159	19657	16151	837.327
Chr12	15.5891	307628	19733.6	14719	944.188
Chr13	15.7056	321199	20451.2	15695	999.324
Chr14	17.8017	357342	20073.5	18399	1033.55
Chr15	15.2317	305070	20028.6	15140	993.977
Chr16	14.6198	298464	20415	14553	995.43
Chr17	15.1898	297823	19606.8	13307	876.051
Chr18	16.264	323830	19910.8	15478	951.672
Chr19	15.6237	276539	17700	11707	749.313
scaffold_25	0.64064	6073	9479.58	225	351.211
scaffold_45	0.36203	3377	9327.96	73	201.641
scaffold_67	0.2984	2618	8773.46	81	271.448
scaffold_104	0.23939	1471	6144.78	69	288.233
scaffold_502	0.126651	874	6900.85	42	331.62
scaffold_509	0.125876	637	5060.54	44	349.55
scaffold_522	0.125073	1612	12888.5	10	79.9533
scaffold_780	0.104571	658	6292.38	22	210.383
scaffold_820	0.102332	930	9088.07	54	527.694
scaffold_1549	0.07556	1864	24669.1	57	754.367
scaffold_1697	0.072059	614	8520.8	14	194.285
scaffold_1865	0.068284	386	5652.86	23	336.829
scaffold_1944	0.066818	322	4819.06	4	59.8641
scaffold_2151	0.063019	399	6331.42	0	0
scaffold_2281	0.060697	217	3575.14	0	0
scaffold_2555	0.056646	401	7079.05	4	70.614
scaffold_2798	0.052914	1	18.8986	0	0
scaffold_3255	0.045437	694	15273.9	15	330.127
scaffold_3421	0.040476	2	49.412	0	0
scaffold_3435	0.040109	257	6407.54	7	174.524
scaffold_3488	0.036978	80	2163.45	0	0
scaffold_3518	0.03547	6	169.157	0	0
scaffold_3588	0.028433	164	5767.95	2	70.3408
scaffold_3607	0.024495	72	2939.38	0	0
scaffold_3611	0.023661	52	2197.71	1	42.2636
scaffold_3618	0.021309	4	187.714	0	0
scaffold_3621	0.020187	14	693.516	0	0
total	392.162	7800813	19891.8	397589	1013.84

## Sheet: Table S4
Table S4. Corresponding gene of Significant SNP in eight poplar traits, with the significance threshold level of p < 0.0005.
Trait	SNP	Distance	Nearest Gene	P.value	GO id	Best_arabi_gene	Best_arabi_defline
FL	Chr15_3817205	2885	Potri.015G041400	1.09639e-05	GO:0004518 GO:0006281	AT1G18090	5'-3' exonuclease family protein
FL	Chr13_445017	1567	Potri.013G006700	3.02622e-05	GO:0005515	AT1G56570	Tetratricopeptide repeat (TPR)-like superfamily protein
FL	Chr09_11004096	2294	Potri.009G136501	3.07512e-05	GO:0003950
FL	Chr19_15205693	w	Potri.019G129400	4.42709e-05	GO:0004672 GO:0004713 GO:0005515 GO:0005524 GO:0006468	AT4G08850	Leucine-rich repeat receptor-like protein kinase family protein
FL	Chr01_36893479	2683	Potri.001G355200	6.6834e-05	GO:0016491 GO:0055114
FL	Chr11_19001038	w	Potri.011G165600	6.84691e-05		AT1G55790	Domain of unknown function (DUF2431)
FL	Chr10_16946809	w	Potri.010G165800	7.46982e-05	GO:0016021	AT2G03260	EXS (ERD1/XPR1/SYG1) family protein
FL	Chr16_1087811	w	Potri.016G020400	9.13966e-05	GO:0008152 GO:0016758
FL	Chr05_8450661	w	Potri.005G115800	9.50647e-05	GO:0003824 GO:0009058 GO:0009089 GO:0010285 GO:0030170	AT2G13810	AGD2-like defense response protein 1
FL	Chr06_13038378	2606	Potri.006G150000	0.000100805		AT5G56780	effector of transcription2
FL	Chr06_1020776	w	Potri.006G016100	0.000104708		AT4G16460
FL	Chr17_9122712	w	Potri.017G081500	0.000126253	GO:0000166 GO:0003676	AT3G01210	RNA-binding (RRM/RBD/RNP motifs) family protein
FL	Chr19_14989208	w	Potri.019G126700	0.000131384		AT2G30300	Major facilitator superfamily protein
FL	Chr11_3313860	w	Potri.011G042500	0.000133004	GO:0005509 GO:0016491 GO:0055114	AT4G05020	NAD(P)H dehydrogenase B2
FL	Chr14_15552102	70	Potri.014G186733	0.000138474
FL	Chr13_12098270	276	Potri.013G112200	0.000148577	GO:0003676 GO:0008270
FL	Chr05_11658576	w	Potri.005G144400	0.000162111	GO:0005515	AT5G67320	WD-40 repeat family protein
FL	Chr13_1181249	w	Potri.013G018800	0.000169895	GO:0000062 GO:0005515	AT3G05420	acyl-CoA binding protein 4
FL	Chr14_184511	w	Potri.014G001700	0.000180271	GO:0004672 GO:0004713 GO:0005524 GO:0006468 GO:0006950	AT1G16760	Protein kinase protein with adenine nucleotide alpha hydrolases-like domain
FL	Chr17_2194047	2349	Potri.017G032100	0.000200066	GO:0005515
FL	Chr13_15395765	w	Potri.013G159500	0.000200376	GO:0004672 GO:0004713 GO:0005515 GO:0005524 GO:0006468	AT1G06840	Leucine-rich repeat protein kinase family protein
FL	Chr10_12653682	2463	Potri.010G104600	0.000200968		AT1G14780	MAC/Perforin domain-containing protein
FL	Chr01_47666154	w	Potri.001G450600	0.000210572	GO:0004252 GO:0006508
FL	Chr04_3866502	879	Potri.004G048000	0.000215936
FL	Chr07_532293	2698	Potri.007G007600	0.000222048	GO:0071949	AT2G22830	squalene epoxidase 2
FL	Chr08_5385111	1687	Potri.008G086000	0.000222613	GO:0003677
FL	Chr04_12014388	2463	Potri.004G124200	0.000222984	GO:0016021 GO:0055085	AT5G15100	Auxin efflux carrier family protein
FL	Chr03_14588413	482	Potri.003G126500	0.000226805	GO:0003677	AT1G63480	AT hook motif DNA-binding family protein
FL	Chr05_10066109	w	Potri.005G130900	0.000234959	GO:0004672 GO:0004713 GO:0005524 GO:0006468	AT2G23450	Protein kinase superfamily protein
FL	Chr10_473800	2796	Potri.010G005000	0.000247336	GO:0003735 GO:0005622 GO:0005840 GO:0006412	AT1G48350	Ribosomal L18p/L5e family protein
FL	Chr02_17746657	2635	Potri.002G209900	0.000247988	GO:0003824	AT4G03200	catalytics
FL	Chr16_3395336	w	Potri.016G052500	0.000273525	GO:0008152 GO:0016758	AT4G15550	indole-3-acetate beta-D-glucosyltransferase
FL	Chr19_14987859	w	Potri.019G126700	0.000273911		AT2G30300	Major facilitator superfamily protein
FL	Chr19_15331985	2080	Potri.019G130900	0.000300807	GO:0003677 GO:0005524 GO:0016787
FL	Chr05_909146	w	Potri.005G010700	0.000315317	GO:0005509 GO:0009523 GO:0009654 GO:0015979 GO:0019898	AT4G15510	Photosystem II reaction center PsbP family protein
FL	Chr15_12294602	2654	Potri.015G104100	0.000319789	GO:0006486 GO:0008373	AT3G48820	Glycosyltransferase family 29 (sialyltransferase) family protein
FL	Chr15_12494817	w	Potri.015G106300	0.000323125	GO:0005515	AT5G50970	transducin family protein / WD-40 repeat family protein
FL	Chr15_12383376	w	Potri.015G105100	0.000323502	GO:0005515 GO:0005524 GO:0016887 GO:0019538	AT5G50920	CLPC homologue 1
FL	Chr04_4249367	1543	Potri.004G052400	0.000333816	GO:0004970 GO:0016020
FL	Chr01_20892750	w	Potri.001G205400	0.000334918	GO:0000166 GO:0006812 GO:0016021 GO:0019829 GO:0030001 GO:0046872	AT4G33520	P-type ATP-ase 1
FL	Chr04_3881878	445	Potri.004G048201	0.000337315
FL	Chr04_11835847	w	Potri.004G123300	0.000337524	GO:0000166 GO:0003676	AT3G01150	polypyrimidine tract-binding protein 1
FL	Chr01_35655232	w	Potri.001G345300	0.000350856		AT5G40450
FL	Chr07_532304	2687	Potri.007G007600	0.00036115	GO:0071949	AT2G22830	squalene epoxidase 2
FL	Chr08_15837782	2342	Potri.008G208100	0.000367341		AT4G15802	heat shock factor binding protein
FL	Chr07_14984938	w	Potri.007G139300	0.000373335	GO:0005515 GO:0008270	AT2G20650	RING/U-box superfamily protein
FL	Chr05_23544039	23	Potri.005G237500	0.00037675	GO:0003676 GO:0004527 GO:0004534 GO:0005634 GO:0006139 GO:0008270	AT1G75660	5'-3' exoribonuclease 3
FL	Chr11_14438195	w	Potri.011G114000	0.000398011	GO:0005515
FL	Chr01_45001734	w	Potri.001G422000	0.000398251
FL	Chr05_5923936	w	Potri.005G085700	0.000404103	GO:0005515	AT4G39470	Tetratricopeptide repeat (TPR)-like superfamily protein
FL	Chr06_16849910	1361	Potri.006G168400	0.000408725		AT4G30230
FL	Chr09_3879204	837	Potri.009G027300	0.000421496	GO:0003677	AT5G59780	myb domain protein 59
FL	Chr04_15592708	410	Potri.004G134300	0.000422736	GO:0005515	AT5G08490	Tetratricopeptide repeat (TPR)-like superfamily protein
FL	Chr16_13007685	w	Potri.016G126900	0.000441174	GO:0005515	AT3G11010	receptor like protein 34
FL	Chr13_9557846	2904	Potri.013G093100	0.000454073	GO:0005515
FL	Chr13_445024	1574	Potri.013G006700	0.00046112	GO:0005515	AT1G56570	Tetratricopeptide repeat (TPR)-like superfamily protein
FL	Chr14_1906787	36	Potri.014G030200	0.000464647	GO:0005509
FL	Chr17_1446964	w	Potri.017G020398	0.000471522
FL	Chr19_13303790	w	Potri.019G095200	0.000486936
FL	Chr05_3231082	w	Potri.005G051100	0.000487848
FL	Chr16_14115579	w	Potri.016G137600	0.000492809	GO:0004497 GO:0005506 GO:0016705 GO:0020037 GO:0055114
FW	Chr03_7310460	w	Potri.003G050100	8.76301e-06	GO:0003677 GO:0008289	AT1G52150	Homeobox-leucine zipper family protein / lipid-binding START domain-containing protein
FW	Chr16_4245142	865	Potri.016G061100	4.12993e-05	GO:0003735 GO:0005622 GO:0005840 GO:0006412	AT1G57660	Translation protein SH3-like family protein
FW	Chr16_14519933	1208	Potri.016G143100	8.45082e-05	GO:0003735 GO:0005622 GO:0005840 GO:0006412	AT3G54210	Ribosomal protein L17 family protein
FW	Chr06_6247497	w	Potri.006G083850	9.89759e-05
FW	Chr19_11102815	w	Potri.019G070393	0.00011039	GO:0005515 GO:0007165 GO:0043531	AT5G17680	disease resistance protein (TIR-NBS-LRR class), putative
FW	Chr06_8536006	2142	Potri.006G109900	0.000121475	GO:0004553 GO:0005975	AT5G01930	Glycosyl hydrolase superfamily protein
FW	Chr03_21170983	w	Potri.003G215700	0.000128134	GO:0004672 GO:0005524 GO:0006468	AT3G13670	Protein kinase family protein
FW	Chr15_1960030	w	Potri.015G026200	0.000144013	GO:0005515 GO:0005643 GO:0006810	AT3G57350	Nucleoporin interacting component (Nup93/Nic96-like) family protein
FW	Chr15_1019653	170	Potri.015G015275	0.000144142	GO:0003677	AT3G53310	AP2/B3-like transcriptional factor family protein
FW	Chr14_2432489	w	Potri.014G038000	0.000165803	GO:0004497 GO:0005506 GO:0016705 GO:0020037 GO:0055114
FW	Chr19_2993943	w	Potri.019G018100	0.000175042	GO:0004672 GO:0004713 GO:0005524 GO:0006468	AT3G04530	phosphoenolpyruvate carboxylase kinase 2
FW	Chr01_11912939	2870	Potri.001G144500	0.000182573	GO:0016226	AT1G32500	non-intrinsic ABC protein 6
FW	Chr04_2294571	w	Potri.004G029400	0.000193321	GO:0003735 GO:0005622 GO:0005840 GO:0006412
FW	Chr15_9732202	2545	Potri.015G071700	0.000194041	GO:0003723 GO:0003735 GO:0005840 GO:0006412 GO:0015935	AT3G53870	Ribosomal protein S3 family protein
FW	Chr12_12498909	590	Potri.012G102500	0.000201838		AT3G48710	DEK domain-containing chromatin associated protein
FW	Chr12_1122811	2035	Potri.012G001400	0.000202665	GO:0003677 GO:0006355	AT5G07680	NAC domain containing protein 80
FW	Chr11_1926006	w	Potri.011G026100	0.000206116	GO:0006952 GO:0009607
FW	Chr15_9687717	36	Potri.015G071200	0.000213621	GO:0004842 GO:0005488 GO:0005515 GO:0016567	AT5G65200	plant U-box 38
FW	Chr15_9732611	2954	Potri.015G071700	0.000219432	GO:0003723 GO:0003735 GO:0005840 GO:0006412 GO:0015935	AT3G53870	Ribosomal protein S3 family protein
FW	Chr09_11355136	w	Potri.009G142600	0.000223014		AT4G35210	Arabidopsis protein of unknown function (DUF241)
FW	Chr19_3296067	w	Potri.019G021200	0.000223649	GO:0005515	AT1G63150	Tetratricopeptide repeat (TPR)-like superfamily protein
FW	Chr08_484082	1941	Potri.008G010000	0.000229644	GO:0016757 GO:0047262
FW	Chr18_1493293	w	Potri.018G020900	0.000234781	GO:0003676 GO:0005634	AT1G80780	Polynucleotidyl transferase, ribonuclease H-like superfamily protein
FW	Chr06_6971216	w	Potri.006G091600	0.000261805	GO:0005215 GO:0006810 GO:0016020	AT5G28470	Major facilitator superfamily protein
FW	Chr11_2773071	w	Potri.011G036100	0.000279509	GO:0004672 GO:0004674 GO:0004713 GO:0005524 GO:0006468 GO:0048544
FW	Chr15_8111869	w	Potri.015G058500	0.000280468		AT5G08040	mitochondrial import receptor subunit TOM5 homolog
FW	Chr15_8111878	w	Potri.015G058500	0.000280468		AT5G08040	mitochondrial import receptor subunit TOM5 homolog
FW	Chr11_1926830	w	Potri.011G026100	0.000281635	GO:0006952 GO:0009607
FW	Chr11_4914495	w	Potri.011G059101	0.000285319	GO:0050524
FW	Chr06_3650217	1269	Potri.006G052700	0.000291065	GO:0004650 GO:0005975	AT3G57510	Pectin lyase-like superfamily protein
FW	Chr02_23608359	w	Potri.002G244500	0.000296554	GO:0005515
FW	Chr07_8604159	899	Potri.007G067000	0.000311345	GO:0000166 GO:0003676 GO:0008270
FW	Chr17_2122628	w	Potri.017G031450	0.000329735
FW	Chr15_7657559	2462	Potri.015G055500	0.000332119	GO:0000775 GO:0005634 GO:0007049 GO:0007067	AT5G35520	minichromosome instability 12 (mis12)-like
FW	Chr05_8943137	w	Potri.005G120700	0.000341683	GO:0016491 GO:0055114	AT4G36520	Chaperone DnaJ-domain superfamily protein
FW	Chr12_11389146	605	Potri.012G088400	0.000371295
FW	Chr15_12189464	1766	Potri.015G103000	0.000395165		AT3G48770	DNA binding;ATP binding
FW	Chr01_47773225	2406	Potri.001G451600	0.000396863	GO:0005506 GO:0016491 GO:0055114
FW	Chr15_7640126	w	Potri.015G055400	0.000415751	GO:0005524 GO:0008152 GO:0016301	AT1G73980	Phosphoribulokinase / Uridine kinase family
FW	Chr03_1997153	2174	Potri.003G019100	0.000416386	GO:0005524 GO:0016307 GO:0016308 GO:0046488	AT1G10900	Phosphatidylinositol-4-phosphate 5-kinase family protein
FW	Chr04_18175432	w	Potri.004G161700	0.0004206	GO:0005515 GO:0046872	AT2G16485	nucleic acid binding;zinc ion binding;DNA binding
FW	Chr05_23371037	w	Potri.005G235500	0.00042149		AT1G19900	glyoxal oxidase-related protein
FW	Chr10_2024465	1526	Potri.010G011200	0.000431959
FW	Chr01_1898567	2894	Potri.001G025200	0.000432966	GO:0005506 GO:0016705 GO:0020037 GO:0055114
FW	Chr13_13200272	w	Potri.013G123401	0.000440009	GO:0005215 GO:0006810 GO:0016021
FW	Chr06_6956578	w	Potri.006G091500	0.000458574		AT1G04590
FW	Chr15_7649104	w	Potri.015G055400	0.000458921	GO:0005524 GO:0008152 GO:0016301	AT1G73980	Phosphoribulokinase / Uridine kinase family
FW	Chr07_3273505	1123	Potri.007G039901	0.000459813
FW	Chr15_8111921	w	Potri.015G058500	0.000461361		AT5G08040	mitochondrial import receptor subunit TOM5 homolog
FW	Chr01_3161397	2576	Potri.001G043700	0.00046598	GO:0004672 GO:0004713 GO:0005524 GO:0006468	AT1G80870	Protein kinase superfamily protein
FW	Chr07_9028175	w	Potri.007G069500	0.00046608	GO:0004672 GO:0004713 GO:0005515 GO:0005524 GO:0006468	AT1G79570	Protein kinase superfamily protein with octicosapeptide/Phox/Bem1p domain
FW	Chr11_2909515	w	Potri.011G037800	0.000470195	GO:0004672 GO:0005524 GO:0006468 GO:0048544	AT1G11350	S-domain-1 13
FW	Chr15_8205361	w	Potri.015G058900	0.000498044		AT1G18620	(1 of 8) PF14309//PF14383 - Domain of unknown function (DUF4378) (DUF4378) // DUF761-associated sequence motif (VARLMGL)
DWT	Chr04_8250234	1422	Potri.004G096000	5.68691e-06		AT1G48750	Bifunctional inhibitor/lipid-transfer protein/seed storage 2S albumin superfamily protein
DWT	Chr04_8250235	1421	Potri.004G096000	5.68691e-06		AT1G48750	Bifunctional inhibitor/lipid-transfer protein/seed storage 2S albumin superfamily protein
DWT	Chr11_13169766	1319	Potri.011G103700	1.32477e-05	GO:0003854 GO:0006694 GO:0008460 GO:0009225 GO:0016616 GO:0055114	AT1G78570	rhamnose biosynthesis 1
DWT	Chr14_3504587	1195	Potri.014G054900	3.52336e-05
DWT	Chr03_5479030	919	Potri.003G046600	4.07714e-05		AT2G02410	(1 of 1) PF05991 - YacP-like NYN domain (NYN_YacP)
DWT	Chr08_2096934	w	Potri.008G038200	4.44277e-05	GO:0003824 GO:0005737 GO:0006559 GO:0016841
DWT	Chr14_9808149	w	Potri.014G143600	6.97752e-05	GO:0003824 GO:0004553 GO:0004559 GO:0005975 GO:0006013 GO:0008270 GO:0015923 GO:0030246	AT5G13980	Glycosyl hydrolase family 38 protein
DWT	Chr04_18360375	w	Potri.004G164000	7.78283e-05	GO:0004044 GO:0009113 GO:0009116	AT4G34740	GLN phosphoribosyl pyrophosphate amidotransferase 2
DWT	Chr05_5547089	w	Potri.005G081500	8.32673e-05	GO:0005524 GO:0006810 GO:0008270 GO:0016021 GO:0042626 GO:0055085	AT2G22120	RING/FYVE/PHD zinc finger superfamily protein
DWT	Chr01_14404476	1069	Potri.001G168600	8.33137e-05		AT1G72620	alpha/beta-Hydrolases superfamily protein
DWT	Chr02_9548159	w	Potri.002G125400	9.29611e-05	GO:0003700 GO:0006355 GO:0043565	AT1G45249	abscisic acid responsive elements-binding factor 2
DWT	Chr09_5556701	w	Potri.009G050200	9.64382e-05	GO:0005515	AT5G12430	Heat shock protein DnaJ with tetratricopeptide repeat
DWT	Chr04_24042747	w	Potri.004G236000	0.000100263	GO:0016180 GO:0032039	AT3G07530	(1 of 1) PTHR11203:SF2 - INTEGRATOR COMPLEX SUBUNIT 9
DWT	Chr05_5693485	w	Potri.005G083100	0.000138691	GO:0003824 GO:0003852 GO:0009098	AT1G74040	2-isopropylmalate synthase 1
DWT	Chr06_1416599	622	Potri.006G021000	0.000140382	GO:0003677 GO:0003700 GO:0006355	AT2G36450	Integrase-type DNA-binding superfamily protein
DWT	Chr05_2507317	w	Potri.005G039100	0.000144376	GO:0003824 GO:0008152	AT3G05190	D-aminoacid aminotransferase-like PLP-dependent enzymes superfamily protein
DWT	Chr15_14912976	w	Potri.015G143700	0.00015256	GO:0016021	AT4G25570	Cytochrome b561/ferric reductase transmembrane protein family
DWT	Chr11_13169780	1333	Potri.011G103700	0.000158343	GO:0003854 GO:0006694 GO:0008460 GO:0009225 GO:0016616 GO:0055114	AT1G78570	rhamnose biosynthesis 1
DWT	Chr01_41614942	w	Potri.001G392801	0.000168475	GO:0004402 GO:0005515 GO:0008080 GO:0008270 GO:0043966 GO:0044030	AT3G14980	Acyl-CoA N-acyltransferase with RING/FYVE/PHD-type zinc finger protein
DWT	Chr09_7436663	w	Potri.009G076500	0.000174708	GO:0004553 GO:0005975	AT5G58480	O-Glycosyl hydrolases family 17 protein
DWT	Chr01_36699993	1488	Potri.001G352800	0.000179096	GO:0006729 GO:0008124	AT1G29810	Transcriptional coactivator/pterin dehydratase
DWT	Chr01_25151797	2094	Potri.001G232900	0.000187874	GO:0006869 GO:0008289	AT2G18370	Bifunctional inhibitor/lipid-transfer protein/seed storage 2S albumin superfamily protein
DWT	Chr14_10846695	w	Potri.014G154500	0.000192241	GO:0005507 GO:0005975 GO:0016491 GO:0055114
DWT	Chr02_3936054	w	Potri.002G057700	0.000195935	GO:0003824 GO:0008152	AT1G06550	ATP-dependent caseinolytic (Clp) protease/crotonase family protein
DWT	Chr09_10062676	2159	Potri.009G119800	0.000200034		AT2G21510	DNAJ heat shock N-terminal domain-containing protein
DWT	Chr07_14782924	w	Potri.007G135500	0.000214155	GO:0003677 GO:0006351 GO:0006355	AT5G44180	Homeodomain-like transcriptional regulator
DWT	Chr10_21829233	w	Potri.010G239400	0.000214518
DWT	Chr01_4462048	w	Potri.001G058600	0.000224177	GO:0003677 GO:0005634
DWT	Chr03_18904708	465	Potri.003G184300	0.000233675	GO:0004672 GO:0005524 GO:0006468
DWT	Chr04_1950423	2041	Potri.004G025800	0.000236903	GO:0004672 GO:0004713 GO:0005524 GO:0006468	AT4G23270	cysteine-rich RLK (RECEPTOR-like protein kinase) 19
DWT	Chr02_6866950	57	Potri.002G094200	0.000265386	GO:0003677 GO:0003700 GO:0006355	AT1G78080	related to AP2 4
DWT	Chr13_3866445	6	Potri.013G053100	0.000266401	GO:0009507 GO:0046422 GO:0055114	AT1G08550	non-photochemical quenching 1
DWT	Chr01_1002408	867	Potri.001G014200	0.000268737	GO:0003677
DWT	Chr08_11227690	779	Potri.008G163100	0.000302019		AT2G31335
DWT	Chr05_6072584	w	Potri.005G087200	0.000346826	GO:0003677 GO:0003700 GO:0006355	AT5G64750	Integrase-type DNA-binding superfamily protein
DWT	Chr18_487988	w	Potri.018G006000	0.000347341	GO:0000166 GO:0006754 GO:0016021 GO:0016887 GO:0046872	AT2G24520	H(+)-ATPase 5
DWT	Chr15_9682971	2315	Potri.015G071200	0.000349461	GO:0004842 GO:0005488 GO:0005515 GO:0016567	AT5G65200	plant U-box 38
DWT	Chr01_22563917	2567	Potri.001G217050	0.000353027	GO:0015743	AT2G27240	Aluminium activated malate transporter family protein
DWT	Chr06_6121306	2205	Potri.006G082500	0.000368061	GO:0000287 GO:0004427 GO:0005737 GO:0006796	AT3G53620	pyrophosphorylase 4
DWT	Chr10_7415229	2031	Potri.010G042400	0.000377882	GO:0007275	AT1G23420	Plant-specific transcription factor YABBY family protein
DWT	Chr08_8589502	w	Potri.008G130700	0.000386866		AT1G23110	(1 of 2) PTHR35100:SF1 - F15H11.13 PROTEIN
DWT	Chr02_7090549	w	Potri.002G097132	0.000417104
DWT	Chr15_7640126	w	Potri.015G055400	0.000437274	GO:0005524 GO:0008152 GO:0016301	AT1G73980	Phosphoribulokinase / Uridine kinase family
DWT	Chr15_3851489	w	Potri.015G041700	0.000439637	GO:0005779 GO:0007031	AT3G18160	peroxin 3-1
DWT	Chr03_2829319	2331	Potri.003G026510	0.000456094	GO:0003712 GO:0006355	AT1G15790	(1 of 2) PF16987 - KIX domain (KIX_2)
DWT	Chr15_2159999	w	Potri.015G028300	0.0004723	GO:0004576 GO:0006486 GO:0016020	AT1G34130	staurosporin and temperature sensitive 3-like b
DWT	Chr14_4848724	2420	Potri.014G075200	0.000476404	GO:0003677 GO:0008289	AT4G00730	Homeobox-leucine zipper family protein / lipid-binding START domain-containing protein
DWT	Chr03_8672252	1907	Potri.003G060000	0.000477277		AT3G15620	DNA photolyase family protein
DWT	Chr03_8672257	1902	Potri.003G060000	0.000477277		AT3G15620	DNA photolyase family protein
DWT	Chr15_1267684	w	Potri.015G018000	0.000480282	GO:0004672 GO:0004713 GO:0005524 GO:0006468
DWT	Chr06_3821406	w	Potri.006G054100	0.000480438	GO:0005488	AT3G57570	ARM repeat superfamily protein
DWT	Chr13_20368	1307	Potri.013G000200	0.000492768		AT5G26720
DWT	Chr15_7735356	w	Potri.015G056000	0.000493702	GO:0003824 GO:0008152	AT5G23050	acyl-activating enzyme 17
DWT	Chr10_7414939	2321	Potri.010G042400	0.000495791	GO:0007275	AT1G23420	Plant-specific transcription factor YABBY family protein
CLD	Chr06_1741327	1719	Potri.006G026600	3.76077e-06		AT3G56810
CLD	Chr01_28751029	2418	Potri.006G026600	5.06175e-06	GO:0003700 GO:0005634 GO:0006355 GO:0043565
CLD	Chr02_9548159	w	Potri.002G125400	1.66651e-05	GO:0003700 GO:0006355 GO:0043565	AT1G45249	abscisic acid responsive elements-binding factor 2
CLD	Chr10_2018502	2610	Potri.010G011200	6.04761e-05
CLD	Chr10_11521848	w	Potri.010G090100	7.35751e-05	GO:0005216 GO:0005247 GO:0006821 GO:0016020 GO:0055085	AT5G26240	chloride channel D
CLD	Chr01_25151797	2094	Potri.001G232900	7.75425e-05	GO:0006869 GO:0008289	AT2G18370	Bifunctional inhibitor/lipid-transfer protein/seed storage 2S albumin superfamily protein
CLD	Chr04_23910187	2742	Potri.004G234500	9.0531e-05		AT5G45320	(1 of 50) PF03168 - Late embryogenesis abundant protein
CLD	Chr10_18774593	95	Potri.010G192600	9.71794e-05		AT2G39970	Mitochondrial substrate carrier family protein
CLD	Chr01_41528410	2855	Potri.001G392050	0.00011374	GO:0016757
CLD	Chr04_20983548	w	Potri.004G197900	0.00011499	GO:0043531
CLD	Chr13_1845810	w	Potri.013G028200	0.000132185	GO:0005515	AT1G54710	homolog of yeast autophagy 18 (ATG18) H
CLD	Chr14_1096822	2053	Potri.014G017600	0.000138778
CLD	Chr03_18063720	75	Potri.003G172500	0.000145507	GO:0008270	AT1G67325	Ran BP2/NZF zinc finger-like superfamily protein
CLD	Chr04_16034283	346	Potri.004G138600	0.000146208	GO:0005622 GO:0006886	AT5G63640	ENTH/VHS/GAT family protein
CLD	Chr04_10375972	2137	Potri.004G113000	0.000162673
CLD	Chr07_1561095	853	Potri.007G020500	0.000179406	GO:0005524	AT2G18190	P-loop containing nucleoside triphosphate hydrolases superfamily protein
CLD	Chr03_21013868	1197	Potri.003G213300	0.000187339	GO:0003700 GO:0006355 GO:0008270 GO:0043565	AT3G20750	GATA transcription factor 29
CLD	Chr01_44869085	560	Potri.001G420000	0.000189709	GO:0005524
CLD	Chr01_21805830	w	Potri.001G212200	0.000192083	GO:0000786 GO:0003677 GO:0046982
CLD	Chr17_5801384	1380	Potri.017G069300	0.000202624	GO:0005515	AT5G14170	SWIB/MDM2 domain superfamily protein
CLD	Chr10_11295016	w	Potri.010G087400	0.000217102	GO:0031047	AT3G22430	(1 of 1) PTHR21596//PTHR21596:SF11 - RIBONUCLEASE P SUBUNIT P38
CLD	Chr06_22432402	w	Potri.006G219100	0.000227903
CLD	Chr04_6605385	w	Potri.004G080100	0.000230697	GO:0000918 GO:0016887	AT5G24020	septum site-determining protein (MIND)
CLD	Chr01_8755896	w	Potri.001G108600	0.000231608	GO:0016020 GO:0016021 GO:0022857	AT1G68170	nodulin MtN21 /EamA-like transporter family protein
CLD	Chr08_10953543	w	Potri.008G159500	0.000232916		AT3G55760
CLD	Chr11_18382798	2011	Potri.011G158100	0.000241384	GO:0003824 GO:0016491 GO:0016614 GO:0050660 GO:0055114	AT5G44410	FAD-binding Berberine family protein
CLD	Chr07_1578699	173	Potri.007G020732	0.000245034
CLD	Chr05_1949967	w	Potri.005G030100	0.000259942	GO:0004497 GO:0005506 GO:0016705 GO:0020037 GO:0055114	AT3G52970	cytochrome P450, family 76, subfamily G, polypeptide 1
CLD	Chr10_2018512	2600	Potri.010G011200	0.000261694
CLD	Chr06_25559166	2047	Potri.006G259300	0.000267543		AT5G25240
CLD	Chr14_11012872	w	Potri.014G156100	0.000281058	GO:0016020	AT3G21620	ERD (early-responsive to dehydration stress) family protein
CLD	Chr04_1152367	1674	Potri.004G015800	0.000283995
CLD	Chr02_1787274	1220	Potri.002G026800	0.000312283	GO:0000786 GO:0003677 GO:0046982	AT5G10980	Histone superfamily protein
CLD	Chr11_175007	2430	Potri.011G002700	0.000320304	GO:0006855 GO:0015238 GO:0015297 GO:0016020 GO:0055085
CLD	Chr06_17057252	w	Potri.006G169700	0.00032104	GO:0003824 GO:0008152	AT1G51680	4-coumarate:CoA ligase 1
CLD	Chr02_8022534	33	Potri.002G107902	0.000333832	GO:0005515 GO:0008270	AT5G49665	Zinc finger (C3HC4-type RING finger) family protein
CLD	Chr04_21504662	59	Potri.004G207600	0.000336158	GO:0006508 GO:0008234	AT4G35350	xylem cysteine peptidase 1
CLD	Chr17_5443359	586	Potri.017G063966	0.000338746
CLD	Chr15_9711809	w	Potri.015G071400	0.000343598	GO:0004571 GO:0005509 GO:0016020	AT1G27520	Glycosyl hydrolase family 47 protein
CLD	Chr17_5833767	2358	Potri.017G069100	0.000346286		AT3G27090	DCLD (Development and Cell Death) domain protein
CLD	Chr10_11263430	w	Potri.010G086700	0.000346477		AT4G14840	(1 of 2) PTHR33345:SF3 - GENOMIC DNA, CHROMOSOME 3, BAC CLONE:F16J14
CLD	Chr19_8543697	2746	Potri.019G051300	0.000349329		AT3G59390	(1 of 1) KOG3136 - Uncharacterized conserved protein
CLD	Chr01_13168071	463	Potri.001G156500	0.000354291		AT4G16695
CLD	Chr18_5564381	1870	Potri.018G056301	0.000355683
CLD	Chr16_847371	w	Potri.016G016200	0.000360716	GO:0008152 GO:0016758
CLD	Chr06_5070423	804	Potri.006G069100	0.000375864
CLD	Chr04_6602085	1519	Potri.004G079900	0.000378241		AT4G25690
CLD	Chr01_24831459	2912	Potri.001G229000	0.000396297	GO:0007021 GO:0015631 GO:0051082	AT2G44440	Emsy N Terminus (ENT) domain-containing protein
CLD	Chr12_8783854	w	Potri.012G067600	0.000407121	GO:0004672 GO:0004713 GO:0005515 GO:0005524 GO:0006468
CLD	Chr13_10504151	2315	Potri.013G099700	0.000415401	GO:0005975 GO:0046872	AT1G31480	shoot gravitropism 2 (SGR2)
CLD	Chr04_9089084	2368	Potri.004G103300	0.000432258	GO:0004129 GO:0005743 GO:0016747	AT3G29590	HXXXD-type acyl-transferase family protein
CLD	Chr18_9580836	w	Potri.018G077983	0.000448838
CLD	Chr10_15886413	w	Potri.010G148000	0.000451404		AT4G21800	P-loop containing nucleoside triphosphate hydrolases superfamily protein
CLD	Chr04_18360375	w	Potri.004G164000	0.000459992	GO:0004044 GO:0009113 GO:0009116	AT4G34740	GLN phosphoribosyl pyrophosphate amidotransferase 2
CLD	Chr09_7097394	123	Potri.009G072500	0.000475431		AT5G48870	Small nuclear ribonucleoprotein family protein
CLD	Chr17_7187060	305	Potri.017G066200	0.000485401
AD	Chr08_6097666	w	Potri.008G097800	3.69426e-05	GO:0007275	AT1G69180	Plant-specific transcription factor YABBY family protein
AD	Chr02_17623987	w	Potri.002G209602	3.87544e-05	GO:0006631 GO:0016491 GO:0045300 GO:0055114
AD	Chr14_17294354	1140	Potri.014G194500	4.33666e-05		AT4G28740	(1 of 2) PF11998 - Protein of unknown function (DUF3493) (DUF3493)
AD	Chr02_24038753	w	Potri.002G250100	6.03484e-05		AT3G07425
AD	Chr08_6763661	w	Potri.008G106900	8.49748e-05	GO:0003676 GO:0003677 GO:0003899 GO:0006351 GO:0008270	AT4G16265	RNA polymerases M/15 Kd subunit
AD	Chr14_17294344	1150	Potri.014G194500	8.51396e-05		AT4G28740	(1 of 2) PF11998 - Protein of unknown function (DUF3493) (DUF3493)
AD	Chr02_22679249	w	Potri.002G233800	8.6826e-05	GO:0003676 GO:0003677 GO:0006281 GO:0008270 GO:0016788 GO:0016818	AT1G48360	zinc ion binding;nucleic acid binding;hydrolases, acting on acid anhydrides, in phosphorus-containing anhydrides
AD	Chr10_6887833	840	Potri.010G039000	0.000102339		AT1G27200	Domain of unknown function (DUF23)
AD	Chr01_39642903	w	Potri.001G376800	0.000105066
AD	Chr17_6254203	2095	Potri.017G067900	0.000105391	GO:0004672 GO:0004713 GO:0005524 GO:0006468
AD	Chr02_22398899	w	Potri.002G231700	0.000116159	GO:0046983	AT1G05805	basic helix-loop-helix (bHLH) DNA-binding superfamily protein
AD	Chr01_40990516	w	Potri.001G388600	0.000126001	GO:0004097 GO:0008152 GO:0016491 GO:0046148 GO:0055114
AD	Chr02_24178406	w	Potri.002G252900	0.000129504	GO:0005524 GO:0005737 GO:0042026
AD	Chr04_20983548	w	Potri.004G197900	0.000135408	GO:0043531
AD	Chr11_59286	1257	Potri.011G000900	0.000160919		AT4G21810	DERLIN-2.1
AD	Chr04_11508657	w	Potri.004G120800	0.000166284	GO:0003700 GO:0006355 GO:0043565
AD	Chr02_24092438	60	Potri.002G251400	0.000172735		AT5G48470
AD	Chr02_24249338	w	Potri.002G253600	0.000184565		AT4G28760	Protein of unknown function (DUF3741)
AD	Chr18_13078900	w	Potri.018G113901	0.000201256
AD	Chr08_6167948	w	Potri.008G098600	0.000202252	GO:0003677 GO:0005515 GO:0005634	AT2G47070	squamosa promoter binding protein-like 1
AD	Chr08_6578793	658	Potri.008G104100	0.000203636	GO:0008152 GO:0016740
AD	Chr08_6585859	w	Potri.008G104300	0.000222675	GO:0003824 GO:0004722 GO:0006470	AT3G17090	Protein phosphatase 2C family protein
AD	Chr13_11860408	w	Potri.013G110300	0.000230317	GO:0005515
AD	Chr01_35887318	601	Potri.001G347200	0.000235446	GO:0003677	AT3G27785	myb domain protein 118
AD	Chr02_23061534	w	Potri.002G237950	0.000249758	GO:0005515 GO:0005634 GO:0008270 GO:0016571 GO:0018024 GO:0034968 GO:0042393	AT5G13960	SU(VAR)3-9 homolog 4
AD	Chr08_6581253	1291	Potri.008G104300	0.000254398	GO:0003824 GO:0004722 GO:0006470	AT3G17090	Protein phosphatase 2C family protein
AD	Chr06_13731117	1957	Potri.006G154000	0.000256206	GO:0007034	AT4G29160	SNF7 family protein
AD	Chr02_24162549	w	Potri.002G252700	0.000261703		AT4G28820	HIT-type Zinc finger family protein
AD	Chr16_944402	1193	Potri.016G018001	0.000264808	GO:0008152 GO:0016758
AD	Chr12_13435560	2700	Potri.012G116170	0.000269395
AD	Chr02_23990616	w	Potri.002G249500	0.000271465	GO:0003924 GO:0005525 GO:0005622 GO:0006886 GO:0006913 GO:0007165 GO:0007264 GO:0015031 GO:0016020
AD	Chr01_47305157	w	Potri.001G447700	0.000275445	GO:0016747
AD	Chr10_15744606	w	Potri.010G146100	0.000277489		AT3G06610	DNA-binding enhancer protein-related
AD	Chr15_12211422	2603	Potri.015G103100	0.000281067		AT3G48770	DNA binding;ATP binding
AD	Chr02_24189624	1946	Potri.002G253100	0.00028341	GO:0000160
AD	Chr08_6442325	2469	Potri.008G101800	0.00029281	GO:0005975
AD	Chr12_5834428	2637	Potri.012G059100	0.000313425	GO:0006950	AT1G48960	Adenine nucleotide alpha hydrolases-like superfamily protein
AD	Chr02_23993035	w	Potri.002G249550	0.000325175
AD	Chr02_24079734	85	Potri.002G251200	0.000329827		AT5G48480	Lactoylglutathione lyase / glyoxalase I family protein
AD	Chr16_13448555	w	Potri.016G130950	0.000334427
AD	Chr02_24248416	w	Potri.002G253600	0.000341809		AT4G28760	Protein of unknown function (DUF3741)
AD	Chr05_2155130	820	Potri.005G032600	0.000346306	GO:0016491 GO:0016702 GO:0046872 GO:0055114	AT1G55020	lipoxygenase 1
AD	Chr08_14716306	2174	Potri.008G203300	0.000348232	GO:0005215 GO:0006810 GO:0016020	AT3G06100	NOD26-like intrinsic protein 7;1
AD	Chr08_6505788	w	Potri.008G103000	0.000350141		AT4G21800	P-loop containing nucleoside triphosphate hydrolases superfamily protein
AD	Chr02_23995995	w	Potri.002G249600	0.000392382		AT5G48540	receptor-like protein kinase-related family protein
AD	Chr08_6769946	w	Potri.008G107100	0.000414353	GO:0003676 GO:0008270	AT5G49400	zinc knuckle (CCHC-type) family protein
AD	Chr08_6061784	w	Potri.008G097200	0.000420125	GO:0005975 GO:0006098 GO:0017057	AT1G13700	6-phosphogluconolactonase 1
AD	Chr08_6061787	w	Potri.008G097200	0.000420125	GO:0005975 GO:0006098 GO:0017057	AT1G13700	6-phosphogluconolactonase 1
AD	Chr02_24143234	508	Potri.002G252400	0.000429027
AD	Chr01_15172450	636	Potri.001G175900	0.000447604	GO:0008830 GO:0016491 GO:0055114
AD	Chr08_6443982	812	Potri.008G101800	0.000447641	GO:0005975
AD	Chr06_4371294	w	Potri.006G061300	0.000451296	GO:0005515
AD	Chr08_18917965	1367	Potri.008G224084	0.000460534
AD	Chr02_24112627	1855	Potri.002G251800	0.00046427		AT4G13220
AD	Chr02_24070332	1670	Potri.002G250900	0.000468608
AD	Chr08_6614226	426	Potri.008G104600	0.000474489	GO:0016788
AD	Chr08_6614085	2017	Potri.008G104700	0.000474489	GO:0016788
AD	Chr08_6448784	w	Potri.008G101800	0.000474489	GO:0005975
AD	Chr08_6722319	w	Potri.008G106400	0.000476068	GO:0004601 GO:0006979 GO:0020037 GO:0055114	AT3G01420	Peroxidase superfamily protein
AD	Chr03_9287977	2843	Potri.003G065701	0.000480733
AD	Chr02_15713753	739	Potri.002G194100	0.00048193	GO:0001682 GO:0004526 GO:0006396	AT2G47300	ribonuclease Ps
AD	Chr12_3589224	1455	Potri.012G040200	0.000485025	GO:0003676 GO:0046872	AT2G01940	C2H2-like zinc finger protein
AD	Chr01_41528410	2855	Potri.001G392050	0.000490517	GO:0016757
AD	Chr04_20219332	w	Potri.004G189700	0.00049164	GO:0005488 GO:0006886 GO:0008565 GO:0015031 GO:0016020 GO:0016192 GO:0030117 GO:0030131	AT5G22780	Adaptor protein complex AP-2, alpha subunit
AD	Chr10_627764	2424	Potri.010G006700	0.000495334
AD	Chr12_3964566	784	Potri.012G044150	0.000497355	GO:0005515
AD	Chr08_6629366	1334	Potri.008G105100	0.000498869	GO:0004672 GO:0004713 GO:0005524 GO:0006355 GO:0006468	AT3G06630	protein kinase family protein
AD	Chr08_6629345	w	Potri.008G105000	0.000498869		AT3G06610	DNA-binding enhancer protein-related
BD	Chr14_17294354	1140	Potri.014G194500	1.00982e-05		AT4G28740	(1 of 2) PF11998 - Protein of unknown function (DUF3493) (DUF3493)
BD	Chr01_39642903	w	Potri.001G376800	1.14244e-05
BD	Chr14_17294344	1150	Potri.014G194500	1.31388e-05		AT4G28740	(1 of 2) PF11998 - Protein of unknown function (DUF3493) (DUF3493)
BD	Chr02_22679249	w	Potri.002G233800	5.39621e-05	GO:0003676 GO:0003677 GO:0006281 GO:0008270 GO:0016788 GO:0016818	AT1G48360	zinc ion binding;nucleic acid binding;hydrolases, acting on acid anhydrides, in phosphorus-containing anhydrides
BD	Chr04_20983548	w	Potri.004G197900	6.49295e-05	GO:0043531
BD	Chr02_22398899	w	Potri.002G231700	9.85162e-05	GO:0046983	AT1G05805	basic helix-loop-helix (bHLH) DNA-binding superfamily protein
BD	Chr17_6254203	2095	Potri.017G067900	0.000114626	GO:0004672 GO:0004713 GO:0005524 GO:0006468
BD	Chr02_24038753	w	Potri.002G250100	0.000135722		AT3G07425
BD	Chr01_28335315	1826	Potri.001G268400	0.000141852
BD	Chr02_23061534	w	Potri.002G237950	0.000182166	GO:0005515 GO:0005634 GO:0008270 GO:0016571 GO:0018024 GO:0034968 GO:0042393	AT5G13960	SU(VAR)3-9 homolog 4
BD	Chr12_5834428	2637	Potri.012G059100	0.000188704	GO:0006950	AT1G48960	Adenine nucleotide alpha hydrolases-like superfamily protein
BD	Chr04_11508657	w	Potri.004G120800	0.000206297	GO:0003700 GO:0006355 GO:0043565
BD	Chr08_6097666	w	Potri.008G097800	0.000221432	GO:0007275	AT1G69180	Plant-specific transcription factor YABBY family protein
BD	Chr04_20779916	w	Potri.004G194800	0.000242597
BD	Chr02_22399237	w	Potri.002G231700	0.000242967	GO:0046983	AT1G05805	basic helix-loop-helix (bHLH) DNA-binding superfamily protein
BD	Chr02_24125981	w	Potri.002G252050	0.000261795
BD	Chr05_21958593	459	Potri.005G216200	0.000268959
BD	Chr01_40990516	w	Potri.001G388600	0.000302836	GO:0004097 GO:0008152 GO:0016491 GO:0046148 GO:0055114
BD	Chr11_14135193	893	Potri.011G111400	0.000324718		AT1G78870	ubiquitin-conjugating enzyme 35
BD	Chr02_23671899	w	Potri.002G245600	0.000334465	GO:0006633 GO:0016790	AT4G13050	Acyl-ACP thioesterase
BD	Chr15_12457090	1004	Potri.015G105900	0.000358028	GO:0046982
BD	Chr15_12220369	w	Potri.015G103300	0.000358103	GO:0004672 GO:0004713 GO:0005524 GO:0006468	AT5G50860	Protein kinase superfamily protein
BD	Chr10_6887833	840	Potri.010G039000	0.00036303		AT1G27200	Domain of unknown function (DUF23)
BD	Chr02_24249338	w	Potri.002G253600	0.000365746		AT4G28760	Protein of unknown function (DUF3741)
BD	Chr02_23990616	w	Potri.002G249500	0.000370654	GO:0003924 GO:0005525 GO:0005622 GO:0006886 GO:0006913 GO:0007165 GO:0007264 GO:0015031 GO:0016020
BD	Chr02_23993035	w	Potri.002G249550	0.000385053
BD	Chr10_22332819	w	Potri.010G250100	0.000387485		AT1G73090
BD	Chr02_24092438	60	Potri.002G251400	0.000392886		AT5G48470
BD	Chr12_13435560	2700	Potri.012G116170	0.000405863
BD	Chr16_944402	1193	Potri.016G018001	0.000416753	GO:0008152 GO:0016758
BD	Chr02_24070332	1670	Potri.002G250900	0.000427526
BD	Chr08_15046278	2484	Potri.008G205550	0.000452299		AT3G11310	(1 of 14) PF12776 - Myb/SANT-like DNA-binding domain (Myb_DNA-bind_3)
BD	Chr04_20779882	w	Potri.004G194800	0.000458918
BD	Chr07_15151501	w	Potri.007G141900	0.000464139	GO:0008152 GO:0016758
DBH	Chr04_15496658	w	Potri.004G133600	2.49328e-06	GO:0003677 GO:0005515 GO:0005634 GO:0006352 GO:0016570	AT5G08430	SWIB/MDM2 domain;Plus-3;GYF
DBH	Chr14_11756214	w	Potri.014G163100	2.92598e-06	GO:0005515	AT2G04750	Actin binding Calponin homology (CH) domain-containing protein
DBH	Chr10_44193	357	Potri.010G000301	7.9618e-06
DBH	Chr15_2955106	1853	Potri.015G035400	8.68203e-06	GO:0005783 GO:0006886 GO:0016021
DBH	Chr07_11935536	85	Potri.007G093850	9.82556e-06
DBH	Chr01_87737	462	Potri.001G000900	1.03404e-05		AT3G13410
DBH	Chr04_1274917	1138	Potri.004G017800	1.04077e-05	GO:0004497 GO:0005506 GO:0016705 GO:0020037 GO:0055114
DBH	Chr06_10842328	2070	Potri.006G132450	1.04078e-05	GO:0003735 GO:0005840 GO:0006412	AT5G02870	Ribosomal protein L4/L1 family
DBH	Chr08_1913640	187	Potri.008G035200	1.05829e-05	GO:0003677 GO:0005515	AT3G10390	Flavin containing amine oxidoreductase family protein
DBH	Chr08_10795428	w	Potri.008G157400	1.23489e-05	GO:0010309 GO:0055114	AT5G43850	RmlC-like cupins superfamily protein
DBH	Chr03_16730278	1842	Potri.003G156301	1.24724e-05		AT4G20150	(1 of 54) 1.6.5.3 - NADH:ubiquinone reductase (H(+)-translocating) / Ubiquinone reductase
DBH	Chr07_4294999	w	Potri.007G046700	1.3173e-05	GO:0003777 GO:0005524 GO:0005871 GO:0007018 GO:0008017
DBH	Chr05_4949359	1115	Potri.005G074066	1.45547e-05	GO:0003824	AT4G39955	alpha/beta-Hydrolases superfamily protein
DBH	Chr06_4206494	w	Potri.006G059600	1.70107e-05	GO:0003824 GO:0004722 GO:0006470
DBH	Chr13_232714	1985	Potri.013G003301	1.74423e-05	GO:0005777 GO:0010468
DBH	Chr07_8228590	1603	Potri.007G065500	2.29172e-05	GO:0003723	AT5G08420	RNA-binding KH domain-containing protein
DBH	Chr12_13764828	w	Potri.012G119500	2.42041e-05	GO:0046982	AT1G31240	Bromodomain transcription factor
DBH	Chr13_15249706	w	Potri.013G157500	2.71606e-05	GO:0003677 GO:0006355 GO:0008270	AT4G32010	HSI2-like 1
DBH	Chr14_17003989	1224	Potri.014G192701	3.30416e-05
DBH	Chr16_13874489	1151	Potri.016G134600	3.4708e-05	GO:0004672 GO:0004713 GO:0005524 GO:0006468	AT3G51630	with no lysine (K) kinase 5
DBH	Chr05_9063484	w	Potri.005G122500	3.691e-05	GO:0003677
DBH	Chr04_5718482	w	Potri.004G066700	3.85192e-05		AT1G73350
DBH	Chr10_15178204	w	Potri.010G137200	4.05335e-05	GO:0003824 GO:0005515	AT1G13630	Tetratricopeptide repeat (TPR)-like superfamily protein
DBH	Chr02_8051019	w	Potri.002G108000	4.15097e-05	GO:0005634 GO:0006355	AT5G65670	indole-3-acetic acid inducible 9
DBH	Chr13_232480	2219	Potri.013G003301	4.28565e-05	GO:0005777 GO:0010468
DBH	Chr11_1881879	w	Potri.011G025300	4.58422e-05		AT4G21745	PAK-box/P21-Rho-binding family protein
DBH	Chr10_10513578	w	Potri.010G078600	5.56798e-05	GO:0006813 GO:0008324	AT5G02940	Protein of unknown function (DUF1012)
DBH	Chr17_7811835	1371	Potri.017G071600	5.66814e-05	GO:0005515	AT5G40400	Pentatricopeptide repeat (PPR) superfamily protein
DBH	Chr07_914433	w	Potri.007G011600	5.68179e-05	GO:0003677 GO:0003700 GO:0006355 GO:0007275	AT5G10510	AINTEGUMENTA-like 6
DBH	Chr13_232478	2221	Potri.013G003301	5.86045e-05	GO:0005777 GO:0010468
DBH	Chr07_4756761	w	Potri.007G050000	6.0982e-05	GO:0005506 GO:0016705 GO:0020037 GO:0055114
DBH	Chr14_2246952	418	Potri.014G035600	6.21493e-05	GO:0003697 GO:0006260	AT1G47720	Primosome PriB/single-strand DNA-binding
DBH	Chr02_22515630	w	Potri.002G232600	6.50076e-05	GO:0005488 GO:0006886 GO:0008536	AT2G31660	ARM repeat superfamily protein
DBH	Chr06_17910166	w	Potri.006G174900	7.0995e-05		AT3G46550	Fasciclin-like arabinogalactan family protein
DBH	Chr12_88940	w	Potri.012G005500	7.2868e-05	GO:0016020	AT5G54100	SPFH/Band 7/PHB domain-containing membrane-associated protein family
DBH	Chr06_9183339	w	Potri.006G117300	7.89635e-05		AT3G10030	aspartate/glutamate/uridylate kinase family protein
DBH	Chr01_37159708	1748	Potri.001G356900	8.02241e-05	GO:0004190 GO:0005764 GO:0006508 GO:0006629 GO:0006665	AT1G62290	Saposin-like aspartyl protease family protein
DBH	Chr13_241977	w	Potri.013G003400	8.03934e-05		AT3G05830
DBH	Chr08_5804953	233	Potri.008G093000	8.94664e-05	GO:0005515	AT1G69350	Tetratricopeptide repeat (TPR)-like superfamily protein
DBH	Chr01_4866883	w	Potri.001G062700	9.29582e-05		AT5G13250	RING finger protein
DBH	Chr11_11455932	w	Potri.011G089300	9.4144e-05	GO:0005096	AT5G55060	(1 of 2) PF13890 - Rab3 GTPase-activating protein catalytic subunit (Rab3-GTPase_cat)
DBH	Chr12_7822534	2806	Potri.012G064500	9.42036e-05	GO:0016491 GO:0016757 GO:0047262 GO:0055114	AT1G18580	galacturonosyltransferase 11
DBH	Chr17_1631267	w	Potri.017G019300	9.8153e-05		AT3G60470	Plant protein of unknown function (DUF247)
DBH	Chr16_1963974	2309	Potri.016G034000	0.000109204	GO:0003676 GO:0005515 GO:0005524 GO:0008270 GO:0016818
DBH	Chr18_5565436	815	Potri.018G056301	0.000109577
DBH	Chr17_1632206	w	Potri.017G019300	0.00011022		AT3G60470	Plant protein of unknown function (DUF247)
DBH	Chr11_2588089	192	Potri.011G031900	0.00011073		AT1G11480	eukaryotic translation initiation factor-related
DBH	Chr16_13874466	1174	Potri.016G134600	0.000111479	GO:0004672 GO:0004713 GO:0005524 GO:0006468	AT3G51630	with no lysine (K) kinase 5
DBH	Chr08_7934086	1760	Potri.008G122100	0.000113089	GO:0003677	AT1G25340	myb domain protein 116
DBH	Chr08_18902077	2797	Potri.008G223987	0.000116233
DBH	Chr02_9541684	w	Potri.002G125300	0.000117394
DBH	Chr16_11056937	w	Potri.016G106100	0.000118202	GO:0005507 GO:0016491 GO:0046274 GO:0048046 GO:0052716 GO:0055114	AT3G09220	laccase 7
DBH	Chr16_6731534	1575	Potri.016G085800	0.000121082	GO:0003735 GO:0005622 GO:0005840 GO:0006412 GO:0015935	AT5G02960	Ribosomal protein S12/S23 family protein
DBH	Chr09_6119647	692	Potri.009G058500	0.000122203
DBH	Chr07_267688	2423	Potri.007G003800	0.000123449	GO:0016747	AT5G16410	HXXXD-type acyl-transferase family protein
DBH	Chr08_16707888	1175	Potri.008G215100	0.000129377	GO:0005515	AT2G39090	tetratricopeptide repeat (TPR)-containing protein
DBH	Chr18_14622053	w	Potri.018G141100	0.000134949	GO:0004571 GO:0005509 GO:0016020
DBH	Chr13_2695005	w	Potri.013G039700	0.00013608	GO:0016747
DBH	Chr07_9712291	w	Potri.007G074201	0.000136725	GO:0003824 GO:0005737 GO:0016627 GO:0055114
DBH	Chr03_8137313	w	Potri.003G055501	0.000137156	GO:0005515
DBH	Chr14_2465210	w	Potri.014G038300	0.000140432	GO:0004672 GO:0004713 GO:0005524 GO:0006468
DBH	Chr05_19870648	1159	Potri.005G191400	0.000140651	GO:0005975 GO:0042132 GO:0042578	AT1G43670	Inositol monophosphatase family protein
DBH	Chr15_10764966	w	Potri.015G082500	0.000144713	GO:0004407 GO:0016575	AT5G63110	histone deacetylase 6
DBH	Chr02_20265406	1289	Potri.002G216100	0.000147932	GO:0004659 GO:0008495 GO:0016021 GO:0048034	AT2G44520	cytochrome c oxidase 10
DBH	Chr01_25878263	601	Potri.001G241300	0.000151324	GO:0004252 GO:0006508 GO:0016021	AT2G29050	RHOMBOID-like 1
DBH	Chr01_6340656	w	Potri.001G079800	0.00015738	GO:0003677 GO:0003700 GO:0006355	AT5G51190	Integrase-type DNA-binding superfamily protein
DBH	Chr18_15038123	w	Potri.018G146300	0.000157683	GO:0003824 GO:0004075 GO:0005524 GO:0016874 GO:0046872	AT5G35360	acetyl Co-enzyme a carboxylase biotin carboxylase subunit
DBH	Chr13_240811	w	Potri.013G003400	0.000158961		AT3G05830
DBH	Chr13_242763	w	Potri.013G003400	0.000163449		AT3G05830
DBH	Chr08_2238849	w	Potri.008G040000	0.000165951		AT5G14980	alpha/beta-Hydrolases superfamily protein
DBH	Chr19_14388674	720	Potri.019G117500	0.000170201		AT4G10265	Wound-responsive family protein
DBH	Chr05_4238944	570	Potri.005G065300	0.000171386	GO:0046982	AT2G13570	nuclear factor Y, subunit B7
DBH	Chr01_36066217	w	Potri.001G348800	0.000172532	GO:0004252 GO:0005515 GO:0006508	AT3G27925	DegP protease 1
DBH	Chr18_16070765	w	Potri.018G149500	0.000174227	GO:0004373
DBH	Chr06_22190400	147	Potri.006G216300	0.000174319		AT2G37300
DBH	Chr14_11153602	w	Potri.014G157800	0.000175399	GO:0005215 GO:0006810 GO:0016020 GO:0055085	AT2G05760	Xanthine/uracil permease family protein
DBH	Chr15_11496822	w	Potri.015G092000	0.000175899	GO:0003824 GO:0004474 GO:0006097	AT5G03860	malate synthase
DBH	Chr01_24928913	w	Potri.001G229900	0.000178091	GO:0047134 GO:0055114	AT5G40590	Cysteine/Histidine-rich C1 domain family protein
DBH	Chr13_15219401	w	Potri.013G157250	0.000178549
DBH	Chr17_7999404	1721	Potri.017G072950	0.000180647
DBH	Chr01_30362075	w	Potri.001G291700	0.00018135	GO:0004185 GO:0006508
DBH	Chr03_12511310	w	Potri.003G099900	0.000182367	GO:0003735 GO:0005622 GO:0005840 GO:0006412	AT5G45590	Ribosomal protein L35
DBH	Chr05_5079821	637	Potri.005G075600	0.000184788	GO:0000139 GO:0005338 GO:0005351 GO:0008643 GO:0015780 GO:0016021	AT5G65000	Nucleotide-sugar transporter family protein
DBH	Chr06_17913213	w	Potri.006G175161	0.000187646
DBH	Chr14_11012872	w	Potri.014G156100	0.000191907	GO:0016020	AT3G21620	ERD (early-responsive to dehydration stress) family protein
DBH	Chr09_3989308	w	Potri.009G028800	0.000193442		AT2G28790	Pathogenesis-related thaumatin superfamily protein
DBH	Chr13_240621	w	Potri.013G003400	0.000193801		AT3G05830
DBH	Chr18_12408473	2187	Potri.018G104500	0.000195776
DBH	Chr08_17891411	1073	Potri.008G210650	0.000196024
DBH	Chr13_241482	w	Potri.013G003400	0.000199081		AT3G05830
DBH	Chr17_2338948	868	Potri.017G035401	0.000202258
DBH	Chr01_13706950	w	Potri.001G161700	0.000206764	GO:0005524 GO:0005737 GO:0016787 GO:0030163	AT1G53750	regulatory particle triple-A 1A
DBH	Chr04_14837607	418	Potri.004G131100	0.000208158	GO:0003677 GO:0046983	AT3G66656	AGAMOUS-like 91
DBH	Chr14_5402589	w	Potri.014G084200	0.000208399	GO:0005089	AT1G01700	RHO guanyl-nucleotide exchange factor 2
DBH	Chr10_7111865	w	Potri.010G040600	0.000210564	GO:0006508 GO:0008234	AT1G10570	Cysteine proteinases superfamily protein
DBH	Chr08_1305005	w	Potri.008G025700	0.000211958		AT4G40045
DBH	Chr05_19870649	1158	Potri.005G191400	0.00021604	GO:0005975 GO:0042132 GO:0042578	AT1G43670	Inositol monophosphatase family protein
DBH	Chr02_976418	w	Potri.002G016100	0.000217561	GO:0003824 GO:0004630 GO:0005509 GO:0005515 GO:0016020 GO:0046470
DBH	Chr13_2359170	259	Potri.013G036000	0.000217873	GO:0003824 GO:0008270	AT5G28050	Cytidine/deoxycytidylate deaminase family protein
DBH	Chr14_9639180	w	Potri.014G141800	0.000219463	GO:0005515 GO:0016787	AT2G42810	protein phosphatase 5.2
DBH	Chr07_4756765	w	Potri.007G050000	0.000220067
DBH	Chr10_12543798	w	Potri.010G102900	0.000223039	GO:0000155 GO:0000160 GO:0007165 GO:0016310 GO:0016772	AT2G01830	CHASE domain containing histidine kinase protein
DBH	Chr01_2032727	w	Potri.001G027100	0.000224064	GO:0005215 GO:0006810 GO:0016020	AT3G54450	Major facilitator superfamily protein
DBH	Chr12_13847297	w	Potri.012G120768	0.000226627
DBH	Chr10_1182089	w	Potri.010G007833	0.000227462	GO:0004866
DBH	Chr16_814277	543	Potri.016G015500	0.000228384	GO:0005199	AT3G22120	cell wall-plasma membrane linker protein
DBH	Chr04_18474800	1225	Potri.004G165500	0.000228818	GO:0009733
DBH	Chr08_1574279	237	Potri.008G029500	0.000231644		AT3G52170	DNA binding
DBH	Chr11_16212928	w	Potri.011G129000	0.000234152	GO:0004672 GO:0004674 GO:0004713 GO:0005524 GO:0006468 GO:0048544
DBH	Chr09_4819142	68	Potri.009G040500	0.000238445	GO:0004842 GO:0005515 GO:0008270 GO:0016567
DBH	Chr13_236048	w	Potri.013G003301	0.000239927	GO:0005777 GO:0010468
DBH	Chr13_236052	w	Potri.013G003301	0.000239927	GO:0005777 GO:0010468
DBH	Chr13_242377	w	Potri.013G003400	0.00025115		AT3G05830
DBH	Chr05_20690353	1698	Potri.005G201200	0.000252794	GO:0004553 GO:0005618 GO:0005975 GO:0006073 GO:0010411 GO:0016762 GO:0042546 GO:0048046
DBH	Chr06_11675860	w	Potri.006G139500	0.000254901		AT1G19170	Pectin lyase-like superfamily protein
DBH	Chr04_11296110	1761	Potri.004G119500	0.000261342	GO:0005515	AT5G39250	F-box family protein
DBH	Chr14_12384579	w	Potri.014G169400	0.000263315	GO:0003824 GO:0008152	AT2G04350	AMP-dependent synthetase and ligase family protein
DBH	Chr13_32443	w	Potri.013G000300	0.000263474	GO:0000155 GO:0005515 GO:0006355 GO:0007165 GO:0009584 GO:0009585 GO:0009881 GO:0017006 GO:0018298 GO:0042803	AT1G09570	phytochrome A
DBH	Chr18_12437275	w	Potri.018G104900	0.000264677	GO:0005515	AT5G57900	SKP1 interacting partner 1
DBH	Chr03_2098507	w	Potri.003G019900	0.000264947	GO:0016747
DBH	Chr09_6060866	w	Potri.009G057900	0.000265905	GO:0006629	AT1G30370	alpha/beta-Hydrolases superfamily protein
DBH	Chr13_12822185	w	Potri.013G119700	0.000267805		AT2G42370
DBH	Chr04_4866891	547	Potri.004G058200	0.000267814	GO:0006351 GO:0043565	AT4G18650	transcription factor-related
DBH	Chr16_4528125	w	Potri.016G064800	0.000270161	GO:0003824 GO:0016491 GO:0016614 GO:0050660 GO:0055114	AT5G06580	FAD-linked oxidases family protein
DBH	Chr15_3531554	496	Potri.015G039700	0.000270163	GO:0003924 GO:0005525 GO:0005622 GO:0006886 GO:0006913 GO:0007165 GO:0007264 GO:0015031 GO:0016020	AT1G18200	RAB GTPase homolog A6B
DBH	Chr10_13952102	w	Potri.010G121600	0.000275156	GO:0003824 GO:0004722 GO:0006470	AT1G68410	Protein phosphatase 2C family protein
DBH	Chr01_42732175	2360	Potri.001G401300	0.000278849	GO:0005507 GO:0016491 GO:0046274 GO:0048046 GO:0052716 GO:0055114	AT5G60020	laccase 17
DBH	Chr14_11640290	214	Potri.014G162000	0.000279561	GO:0016021	AT5G35735	Auxin-responsive family protein
DBH	Chr05_6936274	w	Potri.005G097400	0.000280275	GO:0000079 GO:0006355 GO:0019901
DBH	Chr01_46776885	w	Potri.001G443025	0.000286871
DBH	Chr07_13086677	2848	Potri.007G108500	0.000288957	GO:0008270 GO:0016491 GO:0055114	AT1G77120	alcohol dehydrogenase 1
DBH	Chr01_137363	w	Potri.001G002000	0.000292577		AT1G55500	evolutionarily conserved C-terminal region 4
DBH	Chr05_5066417	w	Potri.005G075300	0.000299159	GO:0003924 GO:0005525 GO:0005622 GO:0006886 GO:0006913 GO:0007165 GO:0007264 GO:0015031 GO:0016020	AT5G10260	RAB GTPase homolog H1E
DBH	Chr02_20506738	2338	Potri.002G221000	0.00030215		AT5G35753	Domain of unknown function (DUF3444)
DBH	Chr13_242641	w	Potri.013G003400	0.000312286		AT3G05830
DBH	Chr10_12400338	w	Potri.010G101200	0.000315829	GO:0003676 GO:0046872	AT2G01940	C2H2-like zinc finger protein
DBH	Chr06_10842343	2055	Potri.006G132450	0.000319119	GO:0003735 GO:0005840 GO:0006412	AT5G02870	Ribosomal protein L4/L1 family
DBH	Chr17_12336573	w	Potri.017G116200	0.000321249		AT2G36470	Plant protein of unknown function (DUF868)
DBH	Chr01_33508573	1215	Potri.001G326100	0.000321501	GO:0030001 GO:0046872
DBH	Chr14_12551792	w	Potri.014G170500	0.000324928		AT5G48240	(1 of 1) KOG2974 - Uncharacterized conserved protein
DBH	Chr15_10247677	w	Potri.015G076300	0.000329668
DBH	Chr17_8024846	w	Potri.017G073200	0.000331559	GO:0003824 GO:0005965 GO:0018343 GO:0042127	AT5G40280	Prenyltransferase family protein
DBH	Chr01_44998737	2010	Potri.001G422000	0.000334207
DBH	Chr11_18999848	w	Potri.011G165500	0.000338691		AT4G26490	Late embryogenesis abundant (LEA) hydroxyproline-rich glycoprotein family
DBH	Chr03_7858791	w	Potri.003G053301	0.000340303	GO:0004672 GO:0004713 GO:0005524 GO:0006468
DBH	Chr02_20240970	302	Potri.002G216000	0.000341252	GO:0016788
DBH	Chr08_5342938	w	Potri.008G085400	0.000341643	GO:0000166 GO:0003676 GO:0008270	AT1G50300	TBP-associated factor 15
DBH	Chr02_4755759	w	Potri.002G068600	0.000346336	GO:0003677	AT1G76880	Duplicated homeodomain-like superfamily protein
DBH	Chr04_8828042	2058	Potri.004G101250	0.000347213	GO:0005488	AT1G67140	HEAT repeat-containing protein
DBH	Chr15_4377202	w	Potri.015G045300	0.000349148	GO:0005516 GO:0006950	AT1G73805	Calmodulin binding protein-like
DBH	Chr01_9278239	624	Potri.001G114500	0.000352159	GO:0004672 GO:0004713 GO:0005515 GO:0005524 GO:0006468	AT1G62950	leucine-rich repeat transmembrane protein kinase family protein
DBH	Chr17_1632080	w	Potri.017G019300	0.000361375		AT3G60470	Plant protein of unknown function (DUF247)
DBH	Chr07_7908208	2054	Potri.007G063700	0.000362137	GO:0000166 GO:0016020	AT4G35870	early-responsive to dehydration stress protein (ERD4)
DBH	Chr12_5437976	667	Potri.012G055800	0.000372562		AT1G48840	Plant protein of unknown function (DUF639)
DBH	Chr03_14161607	826	Potri.003G120500	0.000374946	GO:0003824	AT5G51920	Pyridoxal phosphate (PLP)-dependent transferases superfamily protein
DBH	Chr09_12263483	w	Potri.009G157500	0.000376057	GO:0016787
DBH	Chr06_9717890	2238	Potri.006G122100	0.000376183	GO:0003677	AT3G53200	myb domain protein 27
DBH	Chr10_6557529	1324	Potri.010G036400	0.000376327	GO:0003676 GO:0046872	AT1G10480	zinc finger protein 5
DBH	Chr10_19326802	w	Potri.010G201100	0.00037964	GO:0003723 GO:0005488
DBH	Chr14_2317934	141	Potri.014G036700	0.000382645	GO:0005515
DBH	Chr17_1189507	w	Potri.017G016200	0.000383385	GO:0003677 GO:0006351 GO:0006355	AT5G44180	Homeodomain-like transcriptional regulator
DBH	Chr01_2346261	w	Potri.001G031400	0.000389048	GO:0005634 GO:0006351 GO:0006357 GO:0007049 GO:0051726	AT3G12280	retinoblastoma-related 1
DBH	Chr10_14715798	785	Potri.010G130700	0.000405093	GO:0005524 GO:0016887	AT1G26090	P-loop containing nucleoside triphosphate hydrolases superfamily protein
DBH	Chr12_2234382	w	Potri.012G021900	0.000405167	GO:0005515	AT3G49400	Transducin/WD40 repeat-like superfamily protein
DBH	Chr05_5801490	593	Potri.005G084400	0.000406366		AT2G21960
DBH	Chr03_13627845	w	Potri.003G114000	0.000410605	GO:0005515	AT4G22670	HSP70-interacting protein 1
DBH	Chr05_5159231	w	Potri.005G076500	0.000410665		AT4G39840	(1 of 1) KOG3116 - Predicted C3H1-type Zn-finger protein
DBH	Chr17_477695	2874	Potri.017G006500	0.000414461		AT2G43890	Pectin lyase-like superfamily protein
DBH	Chr09_10067953	1461	Potri.009G119900	0.000422279		AT4G34600
DBH	Chr03_12528125	w	Potri.003G100000	0.000424757	GO:0003682 GO:0008168	AT4G19020	chromomethylase 2
DBH	Chr13_218204	w	Potri.013G003100	0.000426636	GO:0005777 GO:0010468
DBH	Chr01_21792995	2724	Potri.001G212000	0.000429696	GO:0003824 GO:0016740
DBH	Chr06_2325644	w	Potri.006G036300	0.000429786	GO:0003824 GO:0008152	AT1G68270	AMP-dependent synthetase and ligase family protein
DBH	Chr13_226526	w	Potri.013G003200	0.000431563	GO:0005777 GO:0010468
DBH	Chr02_1104715	1161	Potri.002G018300	0.000432551	GO:0008270 GO:0016491 GO:0055114
DBH	Chr19_1506510	976	Potri.019G010600	0.00043716	GO:0005515 GO:0008270
DBH	Chr08_693239	w	Potri.008G013900	0.000437188
DBH	Chr04_20319434	1888	Potri.004G191101	0.000448875		AT2G27140	HSP20-like chaperones superfamily protein
DBH	Chr03_20405384	1436	Potri.003G204900	0.000449437	GO:0019867	AT5G19620	outer envelope protein of 80 kDa
DBH	Chr15_11563880	w	Potri.015G093100	0.000454365	GO:0004672 GO:0004713 GO:0005515 GO:0005524 GO:0006468
DBH	Chr16_3054915	w	Potri.016G047600	0.000457438
DBH	Chr05_5127452	w	Potri.005G076200	0.000460464	GO:0005524 GO:0006810 GO:0016021 GO:0016887 GO:0042626 GO:0055085	AT4G39850	peroxisomal ABC transporter 1
DBH	Chr08_4709416	w	Potri.008G076100	0.00046437	GO:0003735 GO:0005622 GO:0005840 GO:0006412	AT2G43460	Ribosomal L38e protein family
DBH	Chr02_7389849	w	Potri.002G100900	0.000467206	GO:0003824 GO:0004553 GO:0005975 GO:0043169	AT4G09020	isoamylase 3
DBH	Chr14_2732548	w	Potri.014G041800	0.000468377	GO:0008152 GO:0016758
DBH	Chr13_240799	w	Potri.013G003400	0.000469912		AT3G05830
DBH	Chr17_14210387	2555	Potri.017G141700	0.000470617
DBH	Chr13_233293	1406	Potri.013G003301	0.000471302	GO:0005777 GO:0010468
DBH	Chr10_6929883	1327	Potri.010G039466	0.000475981		AT1G69980
DBH	Chr13_244268	w	Potri.013G003400	0.000477512		AT3G05830
DBH	Chr17_8718533	w	Potri.017G078800	0.000480356	GO:0005086 GO:0005488 GO:0032012	AT1G13980	sec7 domain-containing protein
DBH	Chr03_21389224	w	Potri.003G219300	0.000481611
DBH	Chr05_13235056	2270	Potri.005G153600	0.000492412	GO:0016747	AT4G24510	HXXXD-type acyl-transferase family protein
DBH	Chr10_14557012	1215	Potri.010G129000	0.000495282	GO:0003676 GO:0046872	AT1G13290	C2H2-like zinc finger protein
DBH	Chr02_354449	w	Potri.002G006300	0.000495305		AT1G20830	multiple chloroplast division site 1
DBH	Chr03_868584	w	Potri.003G009300	0.000496152	GO:0005506 GO:0016226 GO:0051536	AT5G49940	NIFU-like protein 2
H	Chr12_1153374	w	Potri.012G001900	3.46776e-07
H	Chr03_8481533	1937	Potri.003G057700	9.6228e-07
H	Chr17_7999394	1711	Potri.017G072950	1.10706e-06
H	Chr04_5984726	304	Potri.004G071000	1.94793e-06	GO:0008152 GO:0016758	AT3G16520	UDP-glucosyl transferase 88A1
H	Chr12_1153375	w	Potri.012G001900	5.11979e-06
H	Chr09_9340649	521	Potri.009G107500	7.48148e-06		AT3G50440	methyl esterase 10
H	Chr04_5984779	251	Potri.004G071000	7.73933e-06	GO:0008152 GO:0016758	AT3G16520	UDP-glucosyl transferase 88A1
H	Chr18_5038816	1645	Potri.018G051500	8.0221e-06	GO:0005975	AT5G07950
H	Chr11_474407	117	Potri.011G005700	8.40042e-06	GO:0043531
H	Chr01_37379598	w	Potri.001G358300	1.28123e-05	GO:0016020	AT1G30360	Early-responsive to dehydration stress protein (ERD4)
H	Chr17_7999404	1721	Potri.017G072950	1.50976e-05
H	Chr11_343923	1711	Potri.011G004300	1.84365e-05	GO:0000045 GO:0005737	AT4G04620	Ubiquitin-like superfamily protein
H	Chr03_18647658	w	Potri.003G180700	2.23156e-05		AT1G80750	Ribosomal protein L30/L7 family protein
H	Chr02_20241285	617	Potri.002G216000	2.2666e-05	GO:0016788
H	Chr01_14213477	w	Potri.001G166800	2.80116e-05
H	Chr11_565820	w	Potri.011G007200	2.80195e-05	GO:0005783 GO:0006886 GO:0016021	AT5G42570	B-cell receptor-associated 31-like
H	Chr15_5561808	w	Potri.015G050601	2.93865e-05
H	Chr07_8716264	w	Potri.007G067700	3.26016e-05	GO:0005488	AT1G79190	ARM repeat superfamily protein
H	Chr16_13874489	1151	Potri.016G134600	3.35941e-05	GO:0004672 GO:0004713 GO:0005524 GO:0006468	AT3G51630	with no lysine (K) kinase 5
H	Chr11_467321	2369	Potri.011G005601	3.62522e-05	GO:0003677	AT3G53310	AP2/B3-like transcriptional factor family protein
H	Chr15_5561798	w	Potri.015G050601	3.72968e-05
H	Chr11_715664	1913	Potri.011G008548	3.97843e-05	GO:0005515 GO:0007165
H	Chr09_2668412	1874	Potri.009G015400	4.30605e-05	GO:0004601 GO:0006979 GO:0020037 GO:0055114	AT3G09640	ascorbate peroxidase 2
H	Chr03_18843293	w	Potri.003G183501	4.41421e-05
H	Chr01_11778056	1939	Potri.001G142900	4.78579e-05	GO:0003676 GO:0046872	AT4G17810	C2H2 and C2HC zinc fingers superfamily protein
H	Chr11_1780463	w	Potri.011G024000	4.8318e-05	GO:0005085 GO:0005488 GO:0007264	AT4G16340	guanyl-nucleotide exchange factors;GTPase binding;GTP binding
H	Chr11_1780465	w	Potri.011G024000	4.8318e-05	GO:0005085 GO:0005488 GO:0007264	AT4G16340	guanyl-nucleotide exchange factors;GTPase binding;GTP binding
H	Chr11_565840	w	Potri.011G007200	4.91868e-05	GO:0005783 GO:0006886 GO:0016021	AT5G42570	B-cell receptor-associated 31-like
H	Chr11_1575805	w	Potri.011G019750	5.41978e-05	GO:0005515
H	Chr03_18849538	w	Potri.003G183600	6.30432e-05	GO:0016020 GO:0030001 GO:0046873 GO:0055085	AT1G80900	magnesium transporter 1
H	Chr11_474707	w	Potri.011G005700	6.47102e-05	GO:0043531
H	Chr02_17450171	w	Potri.002G208251	6.73556e-05	GO:0004672 GO:0004713 GO:0005524 GO:0006468	AT1G02970	WEE1 kinase homolog
H	Chr04_358598	w	Potri.004G005900	7.01701e-05	GO:0016020	AT4G04340	ERD (early-responsive to dehydration stress) family protein
H	Chr02_17450142	w	Potri.002G208251	7.21109e-05	GO:0004672 GO:0004713 GO:0005524 GO:0006468	AT1G02970	WEE1 kinase homolog
H	Chr15_9447089	w	Potri.015G068900	7.3784e-05	GO:0005515	AT3G01340	Transducin/WD40 repeat-like superfamily protein
H	Chr11_914411	w	Potri.011G009900	7.52466e-05	GO:0004129 GO:0016020 GO:0022904	AT4G04340	ERD (early-responsive to dehydration stress) family protein
H	Chr11_1747021	w	Potri.011G023500	7.99571e-05	GO:0005515	AT3G17640	Leucine-rich repeat (LRR) family protein
H	Chr17_14210387	2555	Potri.017G141700	8.00974e-05
H	Chr11_335970	w	Potri.011G004200	8.38669e-05	GO:0006486 GO:0008378 GO:0016020
H	Chr11_546492	w	Potri.011G006800	9.04687e-05	GO:0004047 GO:0005515 GO:0006546	AT1G11860	Glycine cleavage T-protein family
H	Chr02_17450949	w	Potri.002G208251	9.24129e-05	GO:0004672 GO:0004713 GO:0005524 GO:0006468	AT1G02970	WEE1 kinase homolog
H	Chr19_12133064	w	Potri.019G080900	9.63504e-05		AT1G35510	O-fucosyltransferase family protein
H	Chr11_715966	1611	Potri.011G008548	0.000101986	GO:0005515 GO:0007165
H	Chr06_13499393	1684	Potri.006G152600	0.000110901	GO:0003872 GO:0006002 GO:0006096	AT5G56630	phosphofructokinase 7
H	Chr18_15038123	w	Potri.018G146300	0.00011131	GO:0003824 GO:0004075 GO:0005524 GO:0016874 GO:0046872	AT5G35360	acetyl Co-enzyme a carboxylase biotin carboxylase subunit
H	Chr11_695453	w	Potri.011G008420	0.000115841	GO:0043531
H	Chr11_1787469	w	Potri.011G024000	0.000123543	GO:0005085 GO:0005488 GO:0007264	AT4G16340	guanyl-nucleotide exchange factors;GTPase binding;GTP binding
H	Chr11_715939	1638	Potri.011G008548	0.00012569	GO:0005515 GO:0007165
H	Chr11_561814	45	Potri.011G007100	0.000130992	GO:0016021	AT4G04470	Peroxisomal membrane 22 kDa (Mpv17/PMP22) family protein
H	Chr18_5013348	w	Potri.018G051400	0.000132794	GO:0004857 GO:0005618 GO:0030599 GO:0042545
H	Chr03_20057850	505	Potri.003G200080	0.000145633
H	Chr10_6360260	1934	Potri.010G034900	0.000147102		AT1G27090	glycine-rich protein
H	Chr03_18843502	w	Potri.003G183501	0.000148478
H	Chr14_2465210	w	Potri.014G038300	0.000154374	GO:0004672 GO:0004713 GO:0005524 GO:0006468
H	Chr17_1632206	w	Potri.017G019300	0.000156876		AT3G60470	Plant protein of unknown function (DUF247)
H	Chr18_11469761	w	Potri.018G094400	0.000162578	GO:0004252 GO:0006508
H	Chr11_475085	w	Potri.011G005700	0.000163389	GO:0043531
H	Chr01_14213482	w	Potri.001G166800	0.000167173
H	Chr01_5335513	978	Potri.001G070700	0.000167643		AT1G28190	(1 of 1) PTHR33052:SF10 - F3H9.15 PROTEIN
H	Chr11_301792	2790	Potri.011G004000	0.000168873	GO:0004672 GO:0004713 GO:0005524 GO:0006468	AT4G18250	receptor serine/threonine kinase, putative
H	Chr14_2732548	w	Potri.014G041800	0.0001696	GO:0008152 GO:0016758
H	Chr03_18848875	w	Potri.003G183600	0.000176268	GO:0016020 GO:0030001 GO:0046873 GO:0055085	AT1G80900	magnesium transporter 1
H	Chr11_1572485	1717	Potri.011G019750	0.000180677	GO:0005515
H	Chr03_18843901	w	Potri.003G183501	0.000183582
H	Chr05_8450661	w	Potri.005G115800	0.000190194	GO:0003824 GO:0009058 GO:0009089 GO:0010285 GO:0030170	AT2G13810	AGD2-like defense response protein 1
H	Chr11_567259	w	Potri.011G007200	0.00019068	GO:0005783 GO:0006886 GO:0016021	AT5G42570	B-cell receptor-associated 31-like
H	Chr11_976792	w	Potri.011G010500	0.00019172	GO:0004672 GO:0004713 GO:0005515 GO:0005524 GO:0006468	AT4G22130	STRUBBELIG-receptor family 8
H	Chr10_9895621	w	Potri.010G070750	0.000193498	GO:0005515 GO:0008270	AT3G23280	XB3 ortholog 5 in Arabidopsis thaliana
H	Chr14_8803732	w	Potri.014G131600	0.000194566	GO:0005783 GO:0016021 GO:0016758	AT2G47760	asparagine-linked glycosylation 3
H	Chr11_745948	w	Potri.011G008740	0.000196644	GO:0005515 GO:0007165 GO:0043531
H	Chr03_18848586	w	Potri.003G183600	0.000198171	GO:0016020 GO:0030001 GO:0046873 GO:0055085	AT1G80900	magnesium transporter 1
H	Chr04_502128	1166	Potri.004G008000	0.000200748
H	Chr04_502132	1170	Potri.004G008000	0.000200748
H	Chr11_1503149	1489	Potri.011G016400	0.000204013	GO:0005515
H	Chr11_1572310	1892	Potri.011G019750	0.000205305	GO:0005515
H	Chr11_1572503	1699	Potri.011G019750	0.000205305	GO:0005515
H	Chr03_18842481	w	Potri.003G183400	0.000206141	GO:0005622 GO:0005801 GO:0006810 GO:0006888	AT1G80500	SNARE-like superfamily protein
H	Chr03_18715477	w	Potri.003G181600	0.000207463
H	Chr08_2238724	w	Potri.008G040000	0.000209049		AT5G14980	alpha/beta-Hydrolases superfamily protein
H	Chr01_30362053	w	Potri.001G291700	0.00020927	GO:0004185 GO:0006508
H	Chr03_18365321	2076	Potri.003G176700	0.000209503	GO:0003824 GO:0008152 GO:0008610 GO:0009058 GO:0016747
H	Chr03_18743500	w	Potri.003G182000	0.000215756	GO:0008152 GO:0016491
H	Chr01_43726360	1905	Potri.001G414677	0.00021755	GO:0004672 GO:0004713 GO:0005524 GO:0006468
H	Chr11_1873495	w	Potri.011G025100	0.000217971
H	Chr11_467480	2528	Potri.011G005601	0.00022393	GO:0003677	AT3G53310	AP2/B3-like transcriptional factor family protein
H	Chr11_567272	w	Potri.011G007200	0.000226714	GO:0005783 GO:0006886 GO:0016021	AT5G42570	B-cell receptor-associated 31-like
H	Chr14_9490453	w	Potri.014G139500	0.000228258	GO:0004222 GO:0005524 GO:0006508 GO:0016020 GO:0016887	AT1G06430	FTSH protease 8
H	Chr03_20349049	2119	Potri.003G204450	0.000228562	GO:0005199 GO:0009664
H	Chr17_14141523	w	Potri.017G140700	0.000233534	GO:0009521 GO:0009767 GO:0016020 GO:0016168 GO:0019684
H	Chr15_13989257	65	Potri.015G129000	0.000233885	GO:0004127 GO:0005524 GO:0006139 GO:0006207 GO:0006221 GO:0009041 GO:0019205	AT4G25280	P-loop containing nucleoside triphosphate hydrolases superfamily protein
H	Chr01_42731804	2471	Potri.001G401100	0.000235722	GO:0005507 GO:0016491 GO:0046274 GO:0048046 GO:0052716 GO:0055114	AT5G60020	laccase 17
H	Chr03_18841764	w	Potri.003G183400	0.00023725	GO:0005622 GO:0005801 GO:0006810 GO:0006888	AT1G80500	SNARE-like superfamily protein
H	Chr11_548280	w	Potri.011G006800	0.000237284	GO:0004047 GO:0005515 GO:0006546	AT1G11860	Glycine cleavage T-protein family
H	Chr11_1575175	w	Potri.011G019750	0.00024109	GO:0005515
H	Chr05_22847760	490	Potri.005G228550	0.000249893
H	Chr03_18951368	w	Potri.003G185175	0.00025183	GO:0004190 GO:0006508	AT1G79720	Eukaryotic aspartyl protease family protein
H	Chr17_7999410	1727	Potri.017G072950	0.000253295
H	Chr15_8594845	378	Potri.015G061800	0.000256226	GO:0016021 GO:0016757	AT1G74380	xyloglucan xylosyltransferase 5
H	Chr14_8649740	w	Potri.014G129000	0.000263611		AT2G47630	alpha/beta-Hydrolases superfamily protein
H	Chr11_2848227	w	Potri.011G037000	0.0002637	GO:0004672 GO:0004674 GO:0004713 GO:0005515 GO:0005524 GO:0006468 GO:0048544
H	Chr10_567428	1324	Potri.010G006200	0.000264233	GO:0003824 GO:0004722 GO:0006470
H	Chr11_548090	w	Potri.011G006800	0.000270829	GO:0004047 GO:0005515 GO:0006546	AT1G11860	Glycine cleavage T-protein family
H	Chr11_1780450	w	Potri.011G024000	0.000274856	GO:0005085 GO:0005488 GO:0007264	AT4G16340	guanyl-nucleotide exchange factors;GTPase binding;GTP binding
H	Chr11_17603212	1725	Potri.011G148400	0.000275372	GO:0016020 GO:0016021 GO:0022857
H	Chr11_1718931	w	Potri.011G023000	0.000279354	GO:0016787	AT4G22300	carboxylesterases
H	Chr03_18516094	w	Potri.003G178800	0.000280654	GO:0003735 GO:0005622 GO:0005840 GO:0006412	AT1G80620	S15/NS1, RNA-binding protein
H	Chr04_18687007	1298	Potri.004G171000	0.000281517	GO:0016884	AT4G34880	Amidase family protein
H	Chr11_1802132	w	Potri.011G024000	0.000292629	GO:0005085 GO:0005488 GO:0007264	AT4G16340	guanyl-nucleotide exchange factors;GTPase binding;GTP binding
H	Chr03_20225467	w	Potri.003G202500	0.000301839
H	Chr03_18453101	w	Potri.003G178000	0.000301841	GO:0003824 GO:0004348 GO:0006665 GO:0006680 GO:0016020 GO:0016021	AT3G24180	Beta-glucosidase, GBA2 type family protein
H	Chr11_2544451	89	Potri.011G031200	0.000315522	GO:0003777 GO:0005524 GO:0005871 GO:0007018 GO:0008017	AT4G05190	kinesin 5
H	Chr03_18596257	w	Potri.003G180000	0.000315552	GO:0005515	AT1G80670	Transducin/WD40 repeat-like superfamily protein
H	Chr11_392790	45	Potri.011G004800	0.000318493	GO:0005515
H	Chr10_3682683	1857	Potri.010G025500	0.000318502	GO:0005515 GO:0048544
H	Chr11_1799267	w	Potri.011G024000	0.000320569	GO:0005085 GO:0005488 GO:0007264	AT4G16340	guanyl-nucleotide exchange factors;GTPase binding;GTP binding
H	Chr14_8809713	w	Potri.014G131600	0.000323942	GO:0005783 GO:0016021 GO:0016758	AT2G47760	asparagine-linked glycosylation 3
H	Chr11_980509	w	Potri.011G010500	0.000325971	GO:0004672 GO:0004713 GO:0005515 GO:0005524 GO:0006468	AT4G22130	STRUBBELIG-receptor family 8
H	Chr15_8255883	w	Potri.015G059301	0.000328769
H	Chr13_5246582	w	Potri.013G067300	0.00033222	GO:0016491 GO:0055114	AT5G17770	NADH:cytochrome B5 reductase 1
H	Chr19_3567158	2585	Potri.019G024200	0.00033716	GO:0005488	AT1G64790	ILITYHIA
H	Chr11_921143	w	Potri.011G009900	0.000337558	GO:0004129 GO:0016020 GO:0022904	AT4G04340	ERD (early-responsive to dehydration stress) family protein
H	Chr02_1628731	w	Potri.002G024966	0.000338784
H	Chr03_18715469	w	Potri.003G181600	0.000339138
H	Chr03_18967066	w	Potri.003G185401	0.000340205
H	Chr17_7811835	1371	Potri.017G071600	0.00034093	GO:0005515	AT5G40400	Pentatricopeptide repeat (PPR) superfamily protein
H	Chr10_6823489	2161	Potri.010G038400	0.000341902	GO:0004739 GO:0006086 GO:0008152 GO:0016624 GO:0043231	AT1G59900	pyruvate dehydrogenase complex E1 alpha subunit
H	Chr17_4660240	570	Potri.017G058200	0.000344922
H	Chr04_16577837	1233	Potri.004G142900	0.000347976
H	Chr11_1654622	w	Potri.011G022000	0.00035369
H	Chr11_1540434	195	Potri.011G019200	0.000354926	GO:0005515
H	Chr11_1540942	w	Potri.011G019200	0.000354926	GO:0005515
H	Chr11_1540953	w	Potri.011G019200	0.000354926	GO:0005515
H	Chr11_1557019	w	Potri.011G019500	0.000354926	GO:0005515
H	Chr11_1575005	w	Potri.011G019750	0.000354926	GO:0005515
H	Chr11_1576002	w	Potri.011G019750	0.000354926	GO:0005515
H	Chr11_467203	2251	Potri.011G005601	0.000356966	GO:0003677	AT3G53310	AP2/B3-like transcriptional factor family protein
H	Chr11_973833	1315	Potri.011G010500	0.000363052	GO:0004672 GO:0004713 GO:0005515 GO:0005524 GO:0006468	AT4G22130	STRUBBELIG-receptor family 8
H	Chr11_335157	w	Potri.011G004200	0.000368311	GO:0006486 GO:0008378 GO:0016020
H	Chr10_16807739	w	Potri.010G163200	0.000368325	GO:0008270	AT1G69420	DHHC-type zinc finger family protein
H	Chr11_1622276	w	Potri.011G021400	0.000369509	GO:0005515
H	Chr11_1622324	w	Potri.011G021400	0.000369509	GO:0005515
H	Chr04_18185932	2726	Potri.004G161800	0.000370353	GO:0003676 GO:0008270	AT1G75560	zinc knuckle (CCHC-type) family protein
H	Chr11_1721473	w	Potri.011G023100	0.000372059	GO:0005743 GO:0006850	AT4G22310	Uncharacterised protein family (UPF0041)
H	Chr06_20678407	w	Potri.006G199200	0.000372555		AT3G54750	(1 of 1) PTHR12972 - DOWNSTREAM NEIGHBOR OF SON
H	Chr11_467212	2260	Potri.011G005601	0.000376172	GO:0003677	AT3G53310	AP2/B3-like transcriptional factor family protein
H	Chr03_18967898	w	Potri.003G185401	0.000377382
H	Chr14_16625722	w	Potri.014G191100	0.000380872	GO:0051225 GO:0070652	AT5G48520	(1 of 1) PTHR19378 - GOLGIN- RELATED
H	Chr11_1614293	233	Potri.011G021332	0.000385142	GO:0005515
H	Chr11_1723529	w	Potri.011G023100	0.000385838	GO:0005743 GO:0006850	AT4G22310	Uncharacterised protein family (UPF0041)
H	Chr11_2640363	344	Potri.011G032700	0.000392957		AT1G11440
H	Chr01_26832953	w	Potri.001G252100	0.000399301	GO:0004435 GO:0005515 GO:0006629 GO:0007165 GO:0008081 GO:0035556	AT5G58700	phosphatidylinositol-speciwc phospholipase C4
H	Chr14_9275141	936	Potri.014G136532	0.000403967
H	Chr02_2006007	2000	Potri.002G030200	0.000405355	GO:0005515	AT1G19720	Pentatricopeptide repeat (PPR-like) superfamily protein
H	Chr09_6521779	w	Potri.009G064200	0.000409019		AT3G52115	gamma response gene 1
H	Chr12_195568	2274	Potri.012G006100	0.000414849	GO:0005515 GO:0007275	AT5G24520	Transducin/WD40 repeat-like superfamily protein
H	Chr13_2359170	259	Potri.013G036000	0.000425338	GO:0003824 GO:0008270	AT5G28050	Cytidine/deoxycytidylate deaminase family protein
H	Chr04_5984492	538	Potri.004G071000	0.000429794	GO:0008152 GO:0016758	AT3G16520	UDP-glucosyl transferase 88A1
H	Chr04_5937193	1955	Potri.004G070000	0.000431176	GO:0008152 GO:0016758	AT3G16520	UDP-glucosyl transferase 88A1
H	Chr15_9340904	408	Potri.015G067700	0.000435297	GO:0003677
H	Chr11_2643765	w	Potri.011G032900	0.000446134		AT1G11430	plastid developmental protein DAG, putative
H	Chr03_18650880	w	Potri.003G180800	0.0004501	GO:0000139 GO:0005801 GO:0006367 GO:0006888 GO:0016021	AT1G15880	golgi snare 11
H	Chr11_1651784	18	Potri.011G021900	0.000453836	GO:0006869 GO:0008289
H	Chr11_919598	w	Potri.011G009900	0.000453873	GO:0004129 GO:0016020 GO:0022904	AT4G04340	ERD (early-responsive to dehydration stress) family protein
H	Chr11_919604	w	Potri.011G009900	0.000453873	GO:0004129 GO:0016020 GO:0022904	AT4G04340	ERD (early-responsive to dehydration stress) family protein
H	Chr14_8038555	w	Potri.014G119600	0.000462724	GO:0031011	AT1G56460	HIT zinc finger ;PAPA-1-like conserved region
H	Chr08_18458510	2429	Potri.008G221200	0.000463379		AT3G16640	translationally controlled tumor protein
H	Chr11_979591	w	Potri.011G010500	0.000465184	GO:0004672 GO:0004713 GO:0005515 GO:0005524 GO:0006468	AT4G22130	STRUBBELIG-receptor family 8
H	Chr13_4650505	w	Potri.013G062700	0.000469926		AT2G21720	Plant protein of unknown function (DUF639)
H	Chr11_916745	w	Potri.011G009900	0.000471786	GO:0004129 GO:0016020 GO:0022904	AT4G04340	ERD (early-responsive to dehydration stress) family protein
H	Chr17_2336584	w	Potri.017G035300	0.00047395	GO:0003677 GO:0005515 GO:0043531
H	Chr10_8567775	w	Potri.010G054300	0.000475623	GO:0000159 GO:0005488 GO:0007165 GO:0008601	AT1G13460	Protein phosphatase 2A regulatory B subunit family protein
H	Chr15_8861293	1820	Potri.015G063300	0.000475754	GO:0046983	AT1G74500	activation-tagged BRI1(brassinosteroid-insensitive 1)-suppressor 1
H	Chr11_1576112	w	Potri.011G019750	0.000476716	GO:0005515
H	Chr11_1576422	w	Potri.011G019750	0.000476716	GO:0005515
H	Chr11_2543251	w	Potri.011G031200	0.000478945	GO:0003777 GO:0005524 GO:0005871 GO:0007018 GO:0008017	AT4G05190	kinesin 5
H	Chr11_3162081	w	Potri.011G040800	0.000479178	GO:0003677 GO:0043531	AT4G19060	P-loop containing nucleoside triphosphate hydrolases superfamily protein
H	Chr18_5247458	w	Potri.018G053400	0.000482693
H	Chr08_2323466	w	Potri.008G041300	0.000483675
H	Chr05_24593558	32	Potri.005G253800	0.000483675	GO:0004930 GO:0004970 GO:0007186 GO:0016020 GO:0016021	AT1G42540	glutamate receptor 3.3
H	Chr03_21149613	w	Potri.003G215400	0.000483677	GO:0004842 GO:0005515 GO:0005634 GO:0006511 GO:0007275 GO:0008270 GO:0016567
H	Chr11_1576173	w	Potri.011G019750	0.000485262	GO:0005515
H	Chr03_20349361	1807	Potri.003G204450	0.00048706	GO:0005199 GO:0009664
H	Chr03_18617695	w	Potri.003G180400	0.000487717		AT1G80690	PPPDE putative thiol peptidase family protein
H	Chr11_565491	w	Potri.011G007200	0.000489561	GO:0005783 GO:0006886 GO:0016021	AT5G42570	B-cell receptor-associated 31-like
H	Chr03_18748833	w	Potri.003G182100	0.000490956	GO:0009055 GO:0051536 GO:0051537	AT4G05450	mitochondrial ferredoxin 1
H	Chr16_12656020	1355	Potri.016G121900	0.000492388		AT5G01580	gamma interferon responsive lysosomal thiol (GILT) reductase family protein
H	Chr02_1549895	w	Potri.002G024400	0.00049387		AT1G19835	Plant protein of unknown function (DUF869)
H	Chr03_18619045	w	Potri.003G180400	0.000495044			PPPDE putative thiol peptidase family protein
H	Chr01_30391804	1498	Potri.001G292000	0.000495359	GO:0005516 GO:0009522 GO:0015979 GO:0042651	AT1G49975	(1 of 2) PF05479 - Photosystem I reaction centre subunit N (PSAN or PSI-N) (PsaN)

## Sheet: Table S5
Table S5. Genome-wide significant candidate genes associated with more than one trait.
Gene	Trait	SNP	Distance	P.value	Best_arabi_defline
Potri.001G232900	DWT	Chr01_25151797	2094	0.000187874	Bifunctional inhibitor/lipid-transfer protein/seed storage 2S albumin superfamily protein
	CLD	Chr01_25151797	2094	7.75e-05	Bifunctional inhibitor/lipid-transfer protein/seed storage 2S albumin superfamily protein
Potri.001G291700	DBH	Chr01_30362075	w	0.00018135
	H	Chr01_30362053	w	0.000209271
Potri.001G376800	AD	Chr01_39642903	w	0.000105066
	BD	Chr01_39642903	w	1.14e-05
Potri.001G388600	AD	Chr01_40990516	w	0.000126001
	BD	Chr01_40990516	w	0.000302836
Potri.001G392050	CLD	Chr01_41528410	2855	0.00011374
	AD	Chr01_41528410	2855	0.000490517
Potri.001G422000	FL	Chr01_45001734	w	0.000398251
	DBH	Chr01_44998737	2010	0.000334207
Potri.002G125400	DWT	Chr02_9548159	w	9.3e-05	abscisic acid responsive elements-binding factor 2
	CLD	Chr02_9548159	w	1.67e-05	abscisic acid responsive elements-binding factor 2
Potri.002G216000	DBH	Chr02_20240970	302	0.000341252
	H	Chr02_20241285	617	2.2666e-05
Potri.002G231700	AD	Chr02_22398899	w	0.000116159	basic helix-loop-helix (bHLH) DNA-binding superfamily protein
	BD	Chr02_22398899	w	9.85e-05	basic helix-loop-helix (bHLH) DNA-binding superfamily protein
	BD	Chr02_22399237	w	0.000242967	basic helix-loop-helix (bHLH) DNA-binding superfamily protein
Potri.002G233800	AD	Chr02_22679249	w	8.68e-05	zinc ion binding;nucleic acid binding;hydrolases, acting on acid anhydrides, in phosphorus-containing anhydrides
	BD	Chr02_22679249	w	5.4e-05	zinc ion binding;nucleic acid binding;hydrolases, acting on acid anhydrides, in phosphorus-containing anhydrides
Potri.002G237950	AD	Chr02_23061534	w	0.000249758	SU(VAR)3-9 homolog 4
	BD	Chr02_23061534	w	0.000182166	SU(VAR)3-9 homolog 4
Potri.002G249500	AD	Chr02_23990616	w	0.000271465
	BD	Chr02_23990616	w	0.000370654
Potri.002G250100	AD	Chr02_24038753	w	6.03e-05
	BD	Chr02_24038753	w	0.000135722
Potri.002G250900	AD	Chr02_24070332	1670	0.000468608
	BD	Chr02_24070332	1670	0.000427526
Potri.002G251400	AD	Chr02_24092438	60	0.000172735
	BD	Chr02_24092438	60	0.000392886
Potri.002G253600	AD	Chr02_24249338	w	0.000184565	Protein of unknown function (DUF3741)
	BD	Chr02_24249338	w	0.000365746	Protein of unknown function (DUF3741)
Potri.004G120800	AD	Chr04_11508657	w	0.000166284
	BD	Chr04_11508657	w	0.000206297
Potri.004G164000	DWT	Chr04_18360375	w	7.78e-05	GLN phosphoribosyl pyrophosphate amidotransferase 2
	CLD	Chr04_18360375	w	0.000459992	GLN phosphoribosyl pyrophosphate amidotransferase 2
Potri.004G197900	CLD	Chr04_20983548	w	0.00011499
	AD	Chr04_20983548	w	0.000135408
	BD	Chr04_20983548	w	6.49e-05
Potri.005G115800	FL	Chr05_8450661	w	9.51e-05	AGD2-like defense response protein 1
	H	Chr05_8450661	w	0.000190194	AGD2-like defense response protein 1
Potri.008G040000	DBH	Chr08_2238849	w	0.000165951	alpha/beta-Hydrolases superfamily protein
	H	Chr08_2238724	w	0.000209049	alpha/beta-Hydrolases superfamily protein
Potri.008G097800	AD	Chr08_6097666	w	3.69e-05	Plant-specific transcription factor YABBY family protein
	BD	Chr08_6097666	w	0.000221432	Plant-specific transcription factor YABBY family protein
Potri.010G011200	FW	Chr10_2024465	1526	0.000431959
	CLD	Chr10_2018502	2610	6.05e-05
Potri.010G039000	AD	Chr10_6887833	840	0.000102339	Domain of unknown function (DUF23)
	BD	Chr10_6887833	840	0.00036303	Domain of unknown function (DUF23)
Potri.012G059100	AD	Chr12_5834428	2637	0.000313425	Adenine nucleotide alpha hydrolases-like superfamily protein
	BD	Chr12_5834428	2637	0.000188704	Adenine nucleotide alpha hydrolases-like superfamily protein
Potri.012G116170	AD	Chr12_13435560	2700	0.000269395
	BD	Chr12_13435560	2700	0.000405863
Potri.013G036000	DBH	Chr13_2359170	259	0.000217873	Cytidine/deoxycytidylate deaminase family protein
	H	Chr13_2359170	259	0.000425338	Cytidine/deoxycytidylate deaminase family protein
Potri.014G038300	DBH	Chr14_2465210	w	0.000140432
	H	Chr14_2465210	w	0.000154374
Potri.014G041800	DBH	Chr14_2732548	w	0.000468377
	H	Chr14_2732548	w	0.0001696
Potri.014G156100	CLD	Chr14_11012872	w	0.000281058	ERD (early-responsive to dehydration stress) family protein
	DBH	Chr14_11012872	w	0.000191907	ERD (early-responsive to dehydration stress) family protein
Potri.014G194500	AD	Chr14_17294354	1140	4.34e-05	(1 of 2) PF11998 - Protein of unknown function (DUF3493) (DUF3493)
	BD	Chr14_17294354	1140	1.01e-05	(1 of 2) PF11998 - Protein of unknown function (DUF3493) (DUF3493)
Potri.015G055400	FW	Chr15_7640126	w	0.000415751	Phosphoribulokinase / Uridine kinase family
	DWT	Chr15_7640126	w	0.000437275	Phosphoribulokinase / Uridine kinase family
Potri.015G071200	FW	Chr15_9687717	36	0.000213621	plant U-box 38
	DWT	Chr15_9682971	2315	0.000349461	plant U-box 38
Potri.016G018001	AD	Chr16_944402	1193	0.000264808
	BD	Chr16_944402	1193	0.000416753
Potri.016G134600	DBH	Chr16_13874489	1151	3.4708e-05	with no lysine (K) kinase 5
	H	Chr16_13874489	1151	3.35941e-05	with no lysine (K) kinase 5
Potri.017G019300	DBH	Chr17_1631267	w	9.8153e-05	Plant protein of unknown function (DUF247)
	H	Chr17_1632206	w	0.000156876	Plant protein of unknown function (DUF247)
Potri.017G067900	AD	Chr17_6254203	2095	0.000105391
	BD	Chr17_6254203	2095	0.000114626
Potri.017G071600	DBH	Chr17_7811835	1371	5.66814e-05	Pentatricopeptide repeat (PPR) superfamily protein
	H	Chr17_7811835	1371	0.00034093	Pentatricopeptide repeat (PPR) superfamily protein
Potri.017G072950	DBH	Chr17_7999404	1721	0.000180647
	H	Chr17_7999394	1711	1.10706e-06
Potri.017G141700	DBH	Chr17_14210387	2555	0.000470617
	H	Chr17_14210387	2555	8.00974e-05
Potri.018G056301	CLD	Chr18_5564381	1870	0.000355683
	DBH	Chr18_5565436	815	0.000109577
Potri.018G146300	DBH	Chr18_15038123	w	0.000157683	acetyl Co-enzyme a carboxylase biotin carboxylase subunit
	H	Chr18_15038123	w	0.00011131	acetyl Co-enzyme a carboxylase biotin carboxylase subunit

## Sheet: Table S6
Table S6. Information on the GO annotated from the corresponding gene with eight poplar traits
Trait	ID	Pathway	GeneRatio	BgRatio	P.value	P.adjust	GeneID	Count
FL	GO:0019829	ATPase-coupled cation transmembrane transporter activity	1/43	11/22436	0.0208859	0.180243	Potri.001G205400	1
	GO:0005509	calcium ion binding	3/43	339/22436	0.0270362	0.180243	Potri.011G042500/Potri.005G010700/Potri.014G030200	3
	GO:0009089	lysine biosynthetic process via diaminopimelate	1/43	17/22436	0.032098	0.180243	Potri.005G115800	1
	GO:0071949	FAD binding	1/43	18/22436	0.0339545	0.180243	Potri.007G007600	1
	GO:0019538	protein metabolic process	1/43	22/22436	0.0413456	0.180243	Potri.015G105100	1
	GO:0019898	extrinsic component of membrane	1/43	22/22436	0.0413456	0.180243	Potri.005G010700	1
	GO:0009654	photosystem II oxygen evolving complex	1/43	27/22436	0.0505068	0.180243	Potri.005G010700	1
	GO:0003950	NAD+ ADP-ribosyltransferase activity	1/43	28/22436	0.0523288	0.180243	Potri.009G136501	1
	GO:0004518	nuclease activity	1/43	28/22436	0.0523288	0.180243	Potri.015G041400	1
	GO:0016758	hexosyltransferase activity	2/43	240/22436	0.0773146	0.218332	Potri.016G020400/Potri.016G052500	2
	GO:0006486	protein glycosylation	1/43	45/22436	0.0827846	0.218332	Potri.015G104100	1
	GO:0006139	nucleobase-containing compound metabolic process	1/43	47/22436	0.0863041	0.218332	Potri.005G237500	1
	GO:0004970	ionotropic glutamate receptor activity	1/43	50/22436	0.0915588	0.218332	Potri.004G052400	1
	GO:0009523	photosystem II	1/43	61/22436	0.110574	0.244843	Potri.005G010700	1
	GO:0030170	pyridoxal phosphate binding	1/43	89/22436	0.157241	0.310932	Potri.005G115800	1
	GO:0006812	cation transport	1/43	91/22436	0.160481	0.310932	Potri.001G205400	1
	GO:0006950	response to stress	1/43	105/22436	0.182824	0.333385	Potri.014G001700	1
	GO:0015979	photosynthesis	1/43	114/22436	0.19688	0.339071	Potri.005G010700	1
	GO:0009058	biosynthetic process	1/43	125/22436	0.213739	0.348731	Potri.005G115800	1
	GO:0004252	serine-type endopeptidase activity	1/43	140/22436	0.236172	0.366066	Potri.001G450600	1
	GO:0030001	metal ion transport	1/43	154/22436	0.256545	0.378709	Potri.001G205400	1
	GO:0006281	DNA repair	1/43	170/22436	0.279179	0.393388	Potri.015G041400	1
	GO:0016887	ATP hydrolysis activity	1/43	225/22436	0.351966	0.474389	Potri.015G105100	1
	GO:0004497	monooxygenase activity	1/43	316/22436	0.456929	0.5902	Potri.016G137600	1
	GO:0016787	hydrolase activity	1/43	338/22436	0.479697	0.594824	Potri.019G130900	1
	GO:0016705	oxidoreductase activity, acting on paired donors, with incorporation or reduction of molecular oxygen	1/43	396/22436	0.535345	0.610378	Potri.016G137600	1
	GO:0005840	ribosome	1/43	421/22436	0.557498	0.610378	Potri.010G005000	1
	GO:0003735	structural constituent of ribosome	1/43	451/22436	0.582722	0.610378	Potri.010G005000	1
	GO:0006412	translation	1/43	463/22436	0.592413	0.610378	Potri.010G005000	1
	GO:0006508	proteolysis	1/43	479/22436	0.604994	0.610378	Potri.001G450600	1
	GO:0005506	iron ion binding	1/43	486/22436	0.610378	0.610378	Potri.016G137600	1
FW	GO:0005840	ribosome	4/37	421/22436	0.00494865	0.0736121	Potri.016G061100/Potri.016G143100/Potri.004G029400/Potri.015G071700	4
	GO:0003735	structural constituent of ribosome	4/37	451/22436	0.00629859	0.0736121	Potri.016G061100/Potri.016G143100/Potri.004G029400/Potri.015G071700	4
	GO:0006412	translation	4/37	463/22436	0.00690113	0.0736121	Potri.016G061100/Potri.016G143100/Potri.004G029400/Potri.015G071700	4
	GO:0048544	recognition of pollen	2/37	149/22436	0.0250666	0.100585	Potri.011G036100/Potri.011G037800	2
	GO:0005643	nuclear pore	1/37	16/22436	0.0260709	0.100585	Potri.015G026200	1
	GO:0016570	histone modification	1/37	17/22436	0.0276782	0.100585	Potri.004G161700	1
	GO:0016307	phosphatidylinositol phosphate kinase activity	1/37	18/22436	0.0292829	0.100585	Potri.003G019100	1
	GO:0046488	phosphatidylinositol metabolic process	1/37	18/22436	0.0292829	0.100585	Potri.003G019100	1
	GO:0016226	iron-sulfur cluster assembly	1/37	21/22436	0.0340816	0.100585	Potri.001G144500	1
	GO:0047262	polygalacturonate 4-alpha-galacturonosyltransferase activity	1/37	21/22436	0.0340816	0.100585	Potri.008G010000	1
	GO:0006810	transport	3/37	435/22436	0.0345762	0.100585	Potri.015G026200/Potri.006G091600/Potri.013G123401	3
	GO:0007049	cell cycle	1/37	27/22436	0.0436098	0.102633	Potri.015G055500	1
	GO:0005506	iron ion binding	3/37	486/22436	0.0455918	0.102633	Potri.014G038000/Potri.001G451600/Potri.001G025200	3
	GO:0004674	protein serine/threonine kinase activity	2/37	215/22436	0.0488891	0.102633	Potri.011G036100/Potri.011G037800	2
	GO:0004650	polygalacturonase activity	1/37	34/22436	0.0546105	0.102633	Potri.006G052700	1
	GO:0005215	transporter activity	2/37	232/22436	0.0559693	0.102633	Potri.006G091600/Potri.013G123401	2
	GO:0009607	response to biotic stimulus	1/37	36/22436	0.0577308	0.102633	Potri.011G026100	1
	GO:0009725	response to hormone	1/37	36/22436	0.0577308	0.102633	Potri.011G059101	1
	GO:0006352	DNA-templated transcription, initiation	1/37	39/22436	0.0623926	0.105082	Potri.004G161700	1
	GO:0015935	small ribosomal subunit	1/37	42/22436	0.067032	0.107251	Potri.015G071700	1
	GO:0016301	kinase activity	1/37	46/22436	0.073183	0.111517	Potri.015G055400	1
	GO:0004497	monooxygenase activity	2/37	316/22436	0.0954873	0.138891	Potri.014G038000/Potri.001G025200	2
	GO:0008289	lipid binding	1/37	78/22436	0.120991	0.168336	Potri.003G050100	1
	GO:0006952	defense response	1/37	85/22436	0.131125	0.174833	Potri.011G026100	1
	GO:0016705	oxidoreductase activity, acting on paired donors, with incorporation or reduction of molecular oxygen	2/37	396/22436	0.138492	0.177214	Potri.014G038000/Potri.001G025200	2
	GO:0016757	glycosyltransferase activity	1/37	94/22436	0.143987	0.177214	Potri.008G010000	1
	GO:0016567	protein ubiquitination	1/37	151/22436	0.221248	0.26222	Potri.015G071200	1
	GO:0004842	ubiquitin-protein transferase activity	1/37	167/22436	0.241687	0.276213	Potri.015G071200	1
	GO:0043531	ADP binding	1/37	310/22436	0.402627	0.444278	Potri.019G070393	1
	GO:0007165	signal transduction	1/37	359/22436	0.44971	0.466978	Potri.019G070393	1
	GO:0003723	RNA binding	1/37	362/22436	0.452473	0.466978	Potri.015G071700	1
	GO:0004553	hydrolase activity, hydrolyzing O-glycosyl compounds	1/37	378/22436	0.466978	0.466978	Potri.006G109900	1
DWT	GO:0008289	lipid binding	2/39	78/22436	0.00813513	0.148695	Potri.001G232900/Potri.014G075200	2
	GO:0005779	integral component of peroxisomal membrane	1/39	12/22436	0.0206661	0.148695	Potri.015G041700	1
	GO:0004427	inorganic diphosphatase activity	1/39	14/22436	0.0240697	0.148695	Potri.006G082500	1
	GO:0004402	histone acetyltransferase activity	1/39	15/22436	0.0257672	0.148695	Potri.001G392801	1
	GO:0006754	ATP biosynthetic process	1/39	16/22436	0.0274618	0.148695	Potri.018G006000	1
	GO:0009507	chloroplast	1/39	20/22436	0.0342116	0.148695	Potri.013G053100	1
	GO:0015743	malate transport	1/39	21/22436	0.0358919	0.148695	Potri.001G217050	1
	GO:0009116	nucleoside metabolic process	1/39	31/22436	0.0525391	0.159471	Potri.004G164000	1
	GO:0003712	transcription coregulator activity	1/39	40/22436	0.0672819	0.159471	Potri.003G026510	1
	GO:0003854	3-beta-hydroxy-delta5-steroid dehydrogenase activity	1/39	40/22436	0.0672819	0.159471	Potri.011G103700	1
	GO:0006869	lipid transport	1/39	41/22436	0.0689061	0.159471	Potri.001G232900	1
	GO:0006486	protein glycosylation	1/39	45/22436	0.0753754	0.159471	Potri.015G028300	1
	GO:0006694	steroid biosynthetic process	1/39	45/22436	0.0753754	0.159471	Potri.011G103700	1
	GO:0016301	kinase activity	1/39	46/22436	0.0769859	0.159471	Potri.015G055400	1
	GO:0008080	N-acetyltransferase activity	1/39	57/22436	0.0945218	0.182732	Potri.001G392801	1
	GO:0007275	multicellular organism development	1/39	61/22436	0.100818	0.182732	Potri.010G042400	1
	GO:0005737	cytoplasm	2/39	345/22436	0.120649	0.205814	Potri.008G038200/Potri.006G082500	2
	GO:0042626	ATPase-coupled transmembrane transporter activity	1/39	80/22436	0.130145	0.209678	Potri.005G081500	1
	GO:0004553	hydrolase activity, hydrolyzing O-glycosyl compounds	2/39	378/22436	0.139912	0.213549	Potri.014G143600/Potri.009G076500	2
	GO:0005507	copper ion binding	1/39	102/22436	0.16294	0.225012	Potri.014G154500	1
	GO:0016616	oxidoreductase activity, acting on the CH-OH group of donors, NAD or NADP as acceptor	1/39	102/22436	0.16294	0.225012	Potri.011G103700	1
	GO:0000287	magnesium ion binding	1/39	145/22436	0.223597	0.289692	Potri.006G082500	1
	GO:0016567	protein ubiquitination	1/39	151/22436	0.231712	0.289692	Potri.015G071200	1
	GO:0030246	carbohydrate binding	1/39	157/22436	0.239745	0.289692	Potri.014G143600	1
	GO:0004842	ubiquitin-protein transferase activity	1/39	167/22436	0.252952	0.293425	Potri.015G071200	1
	GO:0006351	transcription, DNA-templated	1/39	177/22436	0.265935	0.29662	Potri.007G135500	1
	GO:0016887	ATP hydrolysis activity	1/39	225/22436	0.325256	0.349349	Potri.018G006000	1
	GO:0043565	sequence-specific DNA binding	1/39	316/22436	0.425166	0.44035	Potri.002G125400	1
	GO:0006810	transport	1/39	435/22436	0.534308	0.534308	Potri.005G081500	1
CLD	GO:0000786	nucleosome	2/32	80/22436	0.0058104	0.105312	Potri.001G212200/Potri.002G026800	2
	GO:0043565	sequence-specific DNA binding	3/32	316/22436	0.0101489	0.105312	Potri.001G273700/Potri.002G125400/Potri.003G213300	3
	GO:0046982	protein heterodimerization activity	2/32	127/22436	0.0141125	0.105312	Potri.001G212200/Potri.002G026800	2
	GO:0005247	voltage-gated chloride channel activity	1/32	10/22436	0.0141744	0.105312	Potri.010G090100	1
	GO:0006821	chloride transport	1/32	12/22436	0.0169859	0.105312	Potri.010G090100	1
	GO:0031047	gene silencing by RNA	1/32	21/22436	0.0295415	0.152631	Potri.010G087400	1
	GO:0005743	mitochondrial inner membrane	1/32	30/22436	0.0419417	0.153885	Potri.004G103300	1
	GO:0009116	nucleoside metabolic process	1/32	31/22436	0.04331	0.153885	Potri.004G164000	1
	GO:0004129	cytochrome-c oxidase activity	1/32	32/22436	0.0446764	0.153885	Potri.004G103300	1
	GO:0005216	ion channel activity	1/32	36/22436	0.0501231	0.155382	Potri.010G090100	1
	GO:0006869	lipid transport	1/32	41/22436	0.0568892	0.160324	Potri.001G232900	1
	GO:0008234	cysteine-type peptidase activity	1/32	61/22436	0.0834896	0.194112	Potri.004G207600	1
	GO:0006855	xenobiotic transmembrane transport	1/32	69/22436	0.093925	0.194112	Potri.011G002700	1
	GO:0015238	xenobiotic transmembrane transporter activity	1/32	69/22436	0.093925	0.194112	Potri.011G002700	1
	GO:0015297	antiporter activity	1/32	69/22436	0.093925	0.194112	Potri.011G002700	1
	GO:0008289	lipid binding	1/32	78/22436	0.105527	0.204459	Potri.001G232900	1
	GO:0022857	transmembrane transporter activity	1/32	89/22436	0.119512	0.216654	Potri.001G108600	1
	GO:0016757	glycosyltransferase activity	1/32	94/22436	0.125799	0.216654	Potri.001G392050	1
	GO:0016614	oxidoreductase activity, acting on CH-OH group of donors	1/32	101/22436	0.134527	0.219492	Potri.011G158100	1
	GO:0051082	unfolded protein binding	1/32	127/22436	0.166214	0.257631	Potri.001G229000	1
	GO:0050660	flavin adenine dinucleotide binding	1/32	172/22436	0.218419	0.322428	Potri.011G158100	1
	GO:0016747	acyltransferase activity, transferring groups other than amino-acyl groups	1/32	200/22436	0.249289	0.35127	Potri.004G103300	1
	GO:0016887	ATP hydrolysis activity	1/32	225/22436	0.27585	0.371798	Potri.004G080100	1
	GO:0016758	hexosyltransferase activity	1/32	240/22436	0.291348	0.376324	Potri.016G016200	1
	GO:0006886	intracellular protein transport	1/32	254/22436	0.305522	0.378847	Potri.004G138600	1
	GO:0043531	ADP binding	1/32	310/22436	0.359521	0.419143	Potri.004G197900	1
	GO:0004497	monooxygenase activity	1/32	316/22436	0.36506	0.419143	Potri.005G030100	1
	GO:0005509	calcium ion binding	1/32	339/22436	0.385864	0.427206	Potri.015G071400	1
	GO:0016705	oxidoreductase activity, acting on paired donors, with incorporation or reduction of molecular oxygen	1/32	396/22436	0.434615	0.464588	Potri.005G030100	1
	GO:0006508	proteolysis	1/32	479/22436	0.49896	0.50405	Potri.004G207600	1
	GO:0005506	iron ion binding	1/32	486/22436	0.50405	0.50405	Potri.005G030100	1
AD	GO:0016788	hydrolase activity, acting on ester bonds	3/38	156/22436	0.00232701	0.104715	Potri.002G233800/Potri.008G104600/Potri.008G104700	3
	GO:0016571	histone methylation	1/38	10/22436	0.0168119	0.12455	Potri.002G237950	1
	GO:0046148	pigment biosynthetic process	1/38	10/22436	0.0168119	0.12455	Potri.001G388600	1
	GO:0004097	catechol oxidase activity	1/38	14/22436	0.0234593	0.12455	Potri.001G388600	1
	GO:0006098	pentose-phosphate shunt	1/38	15/22436	0.0251143	0.12455	Potri.008G097200	1
	GO:0030131	clathrin adaptor complex	1/38	15/22436	0.0251143	0.12455	Potri.004G189700	1
	GO:0006631	fatty acid metabolic process	1/38	16/22436	0.0267666	0.12455	Potri.002G209602	1
	GO:0016818	hydrolase activity, acting on acid anhydrides, in phosphorus-containing anhydrides	1/38	16/22436	0.0267666	0.12455	Potri.002G233800	1
	GO:0034968	histone lysine methylation	1/38	16/22436	0.0267666	0.12455	Potri.002G237950	1
	GO:0030117	membrane coat	1/38	18/22436	0.030063	0.12455	Potri.004G189700	1
	GO:0007034	vacuolar transport	1/38	19/22436	0.0317071	0.12455	Potri.006G154000	1
	GO:0015031	protein transport	2/38	169/22436	0.0332134	0.12455	Potri.002G249500/Potri.004G189700	2
	GO:0018024	histone-lysine N-methyltransferase activity	1/38	23/22436	0.0382564	0.132426	Potri.002G237950	1
	GO:0042026	protein refolding	1/38	28/22436	0.0463825	0.139147	Potri.002G252900	1
	GO:0042393	histone binding	1/38	28/22436	0.0463825	0.139147	Potri.002G237950	1
	GO:0016702	oxidoreductase activity, acting on single donors with incorporation of molecular oxygen, incorporation of two atoms of oxygen	1/38	30/22436	0.0496141	0.13954	Potri.005G032600	1
	GO:0016740	transferase activity	1/38	37/22436	0.0608412	0.16105	Potri.008G104100	1
	GO:0006886	intracellular protein transport	2/38	254/22436	0.0687748	0.162903	Potri.002G249500/Potri.004G189700	2
	GO:0008565	obsolete protein transporter activity	1/38	42/22436	0.0687813	0.162903	Potri.004G189700	1
	GO:0007275	multicellular organism development	1/38	61/22436	0.0983621	0.221315	Potri.008G097800	1
	GO:0006913	nucleocytoplasmic transport	1/38	72/22436	0.115068	0.246573	Potri.002G249500	1
	GO:0003899	DNA-directed 5'-3' RNA polymerase activity	1/38	78/22436	0.124052	0.253743	Potri.008G106900	1
	GO:0006396	RNA processing	1/38	86/22436	0.135894	0.265879	Potri.002G194100	1
	GO:0016757	glycosyltransferase activity	1/38	94/22436	0.147579	0.270857	Potri.001G392050	1
	GO:0000160	phosphorelay signal transduction system	1/38	96/22436	0.150476	0.270857	Potri.002G253100	1
	GO:0006950	response to stress	1/38	105/22436	0.163396	0.274699	Potri.012G059100	1
	GO:0004722	protein serine/threonine phosphatase activity	1/38	106/22436	0.164819	0.274699	Potri.008G104300	1
	GO:0007264	small GTPase mediated signal transduction	1/38	123/22436	0.188663	0.291798	Potri.002G249500	1
	GO:0016192	vesicle-mediated transport	1/38	129/22436	0.196919	0.291798	Potri.004G189700	1
	GO:0004601	peroxidase activity	1/38	131/22436	0.199653	0.291798	Potri.008G106400	1
	GO:0006470	protein dephosphorylation	1/38	132/22436	0.201017	0.291798	Potri.008G104300	1
	GO:0006979	response to oxidative stress	1/38	139/22436	0.210498	0.296013	Potri.008G106400	1
	GO:0006281	DNA repair	1/38	170/22436	0.251187	0.342528	Potri.002G233800	1
	GO:0006351	transcription, DNA-templated	1/38	177/22436	0.260088	0.344234	Potri.008G106900	1
	GO:0003924	GTPase activity	1/38	198/22436	0.286178	0.360769	Potri.002G249500	1
	GO:0016747	acyltransferase activity, transferring groups other than amino-acyl groups	1/38	200/22436	0.288616	0.360769	Potri.001G447700	1
	GO:0005215	transporter activity	1/38	232/22436	0.326531	0.397132	Potri.008G203300	1
	GO:0016758	hexosyltransferase activity	1/38	240/22436	0.335698	0.397537	Potri.016G018001	1
	GO:0005525	GTP binding	1/38	301/22436	0.401712	0.457616	Potri.002G249500	1
	GO:0043531	ADP binding	1/38	310/22436	0.410894	0.457616	Potri.004G197900	1
	GO:0043565	sequence-specific DNA binding	1/38	316/22436	0.416939	0.457616	Potri.004G120800	1
	GO:0005737	cytoplasm	1/38	345/22436	0.445317	0.477125	Potri.002G252900	1
	GO:0007165	signal transduction	1/38	359/22436	0.45853	0.479857	Potri.002G249500	1
	GO:0046983	protein dimerization activity	1/38	392/22436	0.488475	0.499577	Potri.002G231700	1
	GO:0006810	transport	1/38	435/22436	0.525085	0.525085	Potri.008G203300	1
BD	GO:0016571	histone methylation	1/16	10/22436	0.00710998	0.0442434	Potri.002G237950	1
	GO:0046148	pigment biosynthetic process	1/16	10/22436	0.00710998	0.0442434	Potri.001G388600	1
	GO:0016790	thiolester hydrolase activity	1/16	11/22436	0.00781836	0.0442434	Potri.002G245600	1
	GO:0004097	catechol oxidase activity	1/16	14/22436	0.00994067	0.0442434	Potri.001G388600	1
	GO:0016818	hydrolase activity, acting on acid anhydrides, in phosphorus-containing anhydrides	1/16	16/22436	0.0113532	0.0442434	Potri.002G233800	1
	GO:0034968	histone lysine methylation	1/16	16/22436	0.0113532	0.0442434	Potri.002G237950	1
	GO:0016758	hexosyltransferase activity	2/16	240/22436	0.0123882	0.0442434	Potri.016G018001/Potri.007G141900	2
	GO:0018024	histone-lysine N-methyltransferase activity	1/16	23/22436	0.0162821	0.0502431	Potri.002G237950	1
	GO:0042393	histone binding	1/16	28/22436	0.0197886	0.0502431	Potri.002G237950	1
	GO:0043531	ADP binding	2/16	310/22436	0.0200972	0.0502431	Potri.004G197900/Potri.004G194800	2
	GO:0007275	multicellular organism development	1/16	61/22436	0.0426396	0.0969081	Potri.008G097800	1
	GO:0006913	nucleocytoplasmic transport	1/16	72/22436	0.0501449	0.104469	Potri.002G249500	1
	GO:0006633	fatty acid biosynthetic process	1/16	101/22436	0.0696681	0.129163	Potri.002G245600	1
	GO:0006950	response to stress	1/16	105/22436	0.0723313	0.129163	Potri.012G059100	1
	GO:0007264	small GTPase mediated signal transduction	1/16	123/22436	0.0842272	0.135705	Potri.002G249500	1
	GO:0046982	protein heterodimerization activity	1/16	127/22436	0.0868513	0.135705	Potri.015G105900	1
	GO:0016788	hydrolase activity, acting on ester bonds	1/16	156/22436	0.105666	0.150813	Potri.002G233800	1
	GO:0015031	protein transport	1/16	169/22436	0.113981	0.150813	Potri.002G249500	1
	GO:0006281	DNA repair	1/16	170/22436	0.114618	0.150813	Potri.002G233800	1
	GO:0003924	GTPase activity	1/16	198/22436	0.132271	0.165339	Potri.002G249500	1
	GO:0006886	intracellular protein transport	1/16	254/22436	0.166592	0.198324	Potri.002G249500	1
	GO:0005525	GTP binding	1/16	301/22436	0.19441	0.220765	Potri.002G249500	1
	GO:0043565	sequence-specific DNA binding	1/16	316/22436	0.203104	0.220765	Potri.004G120800	1
	GO:0007165	signal transduction	1/16	359/22436	0.22754	0.23702	Potri.002G249500	1
	GO:0046983	protein dimerization activity	1/16	392/22436	0.245814	0.245814	Potri.002G231700	1
DBH	GO:0005777	peroxisome	3/125	18/22436	0.000129589	0.0129589	Potri.013G003301/Potri.013G003100/Potri.013G003200	3
	GO:0000155	phosphorelay sensor kinase activity	2/125	31/22436	0.0128846	0.387639	Potri.010G102900/Potri.013G000300	2
	GO:0048046	apoplast	3/125	89/22436	0.0135408	0.387639	Potri.016G106100/Potri.005G201200/Potri.001G401300	3
	GO:0016747	acyltransferase activity, transferring groups other than amino-acyl groups	4/125	200/22436	0.0257785	0.387639	Potri.007G003800/Potri.013G039700/Potri.003G019900/Potri.005G153600	4
	GO:0046274	lignin catabolic process	2/125	49/22436	0.0305397	0.387639	Potri.016G106100/Potri.001G401300	2
	GO:0052716	hydroquinone:oxygen oxidoreductase activity	2/125	49/22436	0.0305397	0.387639	Potri.016G106100/Potri.001G401300	2
	GO:0006886	intracellular protein transport	4/125	254/22436	0.0539043	0.387639	Potri.015G035400/Potri.002G232600/Potri.015G039700/Potri.005G075300	4
	GO:0004659	prenyltransferase activity	1/125	10/22436	0.0543484	0.387639	Potri.002G216100	1
	GO:0046470	phosphatidylcholine metabolic process	1/125	11/22436	0.0596193	0.387639	Potri.002G016100	1
	GO:0006913	nucleocytoplasmic transport	2/125	72/22436	0.0611461	0.387639	Potri.015G039700/Potri.005G075300	2
	GO:0000079	regulation of cyclin-dependent protein serine/threonine kinase activity	1/125	12/22436	0.0648612	0.387639	Potri.005G097400	1
	GO:0019901	protein kinase binding	1/125	12/22436	0.0648612	0.387639	Potri.005G097400	1
	GO:0043169	cation binding	1/125	12/22436	0.0648612	0.387639	Potri.002G100900	1
	GO:0000139	Golgi membrane	1/125	13/22436	0.070074	0.387639	Potri.005G075600	1
	GO:0004630	phospholipase D activity	1/125	13/22436	0.070074	0.387639	Potri.002G016100	1
	GO:0005199	structural constituent of cell wall	1/125	13/22436	0.070074	0.387639	Potri.016G015500	1
	GO:0006351	transcription, DNA-templated	3/125	177/22436	0.0765223	0.387639	Potri.004G058200/Potri.017G016200/Potri.001G031400	3
	GO:0016818	hydrolase activity, acting on acid anhydrides, in phosphorus-containing anhydrides	1/125	16/22436	0.0855401	0.387639	Potri.016G034000	1
	GO:0042578	phosphoric ester hydrolase activity	1/125	16/22436	0.0855401	0.387639	Potri.005G191400	1
	GO:0016570	histone modification	1/125	17/22436	0.0906386	0.387639	Potri.004G133600	1
	GO:0003697	single-stranded DNA binding	1/125	18/22436	0.0957088	0.387639	Potri.014G035600	1
	GO:0005089	guanyl-nucleotide exchange factor activity	1/125	19/22436	0.100751	0.387639	Potri.014G084200	1
	GO:0016226	iron-sulfur cluster assembly	1/125	21/22436	0.110752	0.387639	Potri.003G009300	1
	GO:0016310	phosphorylation	1/125	21/22436	0.110752	0.387639	Potri.010G102900	1
	GO:0047262	polygalacturonate 4-alpha-galacturonosyltransferase activity	1/125	21/22436	0.110752	0.387639	Potri.012G064500	1
	GO:0005507	copper ion binding	2/125	102/22436	0.11086	0.387639	Potri.016G106100/Potri.001G401300	2
	GO:0008536	small GTPase binding	1/125	22/22436	0.115711	0.387639	Potri.002G232600	1
	GO:0016772	transferase activity, transferring phosphorus-containing groups	1/125	22/22436	0.115711	0.387639	Potri.010G102900	1
	GO:0016874	ligase activity	1/125	22/22436	0.115711	0.387639	Potri.018G146300	1
	GO:0004722	protein serine/threonine phosphatase activity	2/125	106/22436	0.118107	0.387639	Potri.006G059600/Potri.010G121600	2
	GO:0030163	protein catabolic process	1/125	24/22436	0.125547	0.387639	Potri.001G161700	1
	GO:0006508	proteolysis	5/125	479/22436	0.129797	0.387639	Potri.001G356900/Potri.001G241300/Potri.001G348800/Potri.001G291700/Potri.010G040600	5
	GO:0047134	protein-disulfide reductase (NAD(P)) activity	1/125	26/22436	0.135274	0.387639	Potri.001G229900	1
	GO:0006813	potassium ion transport	1/125	27/22436	0.140097	0.387639	Potri.010G078600	1
	GO:0007049	cell cycle	1/125	27/22436	0.140097	0.387639	Potri.001G031400	1
	GO:0007165	signal transduction	4/125	359/22436	0.140922	0.387639	Potri.010G102900/Potri.013G000300/Potri.015G039700/Potri.005G075300	4
	GO:0006357	regulation of transcription by RNA polymerase II	1/125	28/22436	0.144894	0.387639	Potri.001G031400	1
	GO:0007264	small GTPase mediated signal transduction	2/125	123/22436	0.150094	0.387639	Potri.015G039700/Potri.005G075300	2
	GO:0046982	protein heterodimerization activity	2/125	127/22436	0.157856	0.387639	Potri.012G119500/Potri.005G065300	2
	GO:0004866	endopeptidase inhibitor activity	1/125	31/22436	0.159125	0.387639	Potri.010G007833	1
	GO:0005096	GTPase activator activity	1/125	32/22436	0.163817	0.387639	Potri.011G089300	1
	GO:0006470	protein dephosphorylation	2/125	132/22436	0.167663	0.387639	Potri.006G059600/Potri.010G121600	2
	GO:0005516	calmodulin binding	1/125	34/22436	0.173122	0.387639	Potri.015G045300	1
	GO:0003682	chromatin binding	1/125	36/22436	0.182324	0.387639	Potri.003G100000	1
	GO:0004252	serine-type endopeptidase activity	2/125	140/22436	0.18356	0.387639	Potri.001G241300/Potri.001G348800	2
	GO:0016740	transferase activity	1/125	37/22436	0.186887	0.387639	Potri.001G212000	1
	GO:0006352	DNA-templated transcription, initiation	1/125	39/22436	0.195937	0.387639	Potri.004G133600	1
	GO:0010411	xyloglucan metabolic process	1/125	39/22436	0.195937	0.387639	Potri.005G201200	1
	GO:0006073	cellular glucan metabolic process	1/125	40/22436	0.200424	0.387639	Potri.005G201200	1
	GO:0016762	xyloglucan:xyloglucosyl transferase activity	1/125	40/22436	0.200424	0.387639	Potri.005G201200	1
	GO:0008324	cation transmembrane transporter activity	1/125	41/22436	0.204887	0.387639	Potri.010G078600	1
	GO:0016627	oxidoreductase activity, acting on the CH-CH group of donors	1/125	41/22436	0.204887	0.387639	Potri.007G074201	1
	GO:0005840	ribosome	4/125	421/22436	0.208298	0.387639	Potri.006G132450/Potri.016G085800/Potri.003G099900/Potri.008G076100	4
	GO:0015935	small ribosomal subunit	1/125	42/22436	0.209325	0.387639	Potri.016G085800	1
	GO:0042546	cell wall biogenesis	1/125	46/22436	0.226833	0.412423	Potri.005G201200	1
	GO:0015031	protein transport	2/125	169/22436	0.242605	0.427652	Potri.015G039700/Potri.005G075300	2
	GO:0003735	structural constituent of ribosome	4/125	451/22436	0.243761	0.427652	Potri.006G132450/Potri.016G085800/Potri.003G099900/Potri.008G076100	4
	GO:0004185	serine-type carboxypeptidase activity	1/125	52/22436	0.252376	0.43513	Potri.001G291700	1
	GO:0006412	translation	4/125	463/22436	0.258323	0.437836	Potri.006G132450/Potri.016G085800/Potri.003G099900/Potri.008G076100	4
	GO:0005783	endoplasmic reticulum	1/125	58/22436	0.277081	0.455284	Potri.015G035400	1
	GO:0006629	lipid metabolic process	2/125	189/22436	0.283854	0.455284	Potri.001G356900/Potri.009G057900	2
	GO:0007275	multicellular organism development	1/125	61/22436	0.289129	0.455284	Potri.007G011600	1
	GO:0008234	cysteine-type peptidase activity	1/125	61/22436	0.289129	0.455284	Potri.010G040600	1
	GO:0016787	hydrolase activity	3/125	338/22436	0.291382	0.455284	Potri.001G161700/Potri.014G141800/Potri.009G157500	3
	GO:0003924	GTPase activity	2/125	198/22436	0.302381	0.465202	Potri.015G039700/Potri.005G075300	2
	GO:0051536	iron-sulfur cluster binding	1/125	67/22436	0.312629	0.47368	Potri.003G009300	1
	GO:0006260	DNA replication	1/125	76/22436	0.346442	0.517077	Potri.014G035600	1
	GO:0016887	ATP hydrolysis activity	2/125	225/22436	0.357341	0.518636	Potri.010G130700/Potri.005G076200	2
	GO:0042626	ATPase-coupled transmembrane transporter activity	1/125	80/22436	0.360935	0.518636	Potri.005G076200	1
	GO:0005215	transporter activity	2/125	232/22436	0.37136	0.518636	Potri.014G157800/Potri.001G027100	2
	GO:0005871	kinesin complex	1/125	83/22436	0.371596	0.518636	Potri.007G046700	1
	GO:0003777	microtubule motor activity	1/125	85/22436	0.378604	0.518636	Potri.007G046700	1
	GO:0007018	microtubule-based movement	1/125	85/22436	0.378604	0.518636	Potri.007G046700	1
	GO:0009733	response to auxin	1/125	91/22436	0.399168	0.539417	Potri.004G165500	1
	GO:0016757	glycosyltransferase activity	1/125	94/22436	0.409196	0.545595	Potri.012G064500	1
	GO:0000160	phosphorelay signal transduction system	1/125	96/22436	0.415788	0.54709	Potri.010G102900	1
	GO:0004190	aspartic-type endopeptidase activity	1/125	98/22436	0.422308	0.548452	Potri.001G356900	1
	GO:0016614	oxidoreductase activity, acting on CH-OH group of donors	1/125	101/22436	0.431952	0.553785	Potri.016G064800	1
	GO:0006810	transport	3/125	435/22436	0.437808	0.554187	Potri.014G157800/Potri.001G027100/Potri.005G076200	3
	GO:0006950	response to stress	1/125	105/22436	0.444563	0.555704	Potri.015G045300	1
	GO:0008017	microtubule binding	1/125	109/22436	0.456897	0.56407	Potri.007G046700	1
	GO:0005618	cell wall	1/125	118/22436	0.483662	0.589832	Potri.005G201200	1
	GO:0005525	GTP binding	2/125	301/22436	0.501594	0.604331	Potri.015G039700/Potri.005G075300	2
	GO:0005506	iron ion binding	3/125	486/22436	0.510629	0.607892	Potri.004G017800/Potri.007G050000/Potri.003G009300	3
	GO:0005509	calcium ion binding	2/125	339/22436	0.565669	0.647747	Potri.018G141100/Potri.002G016100	2
	GO:0048544	recognition of pollen	1/125	149/22436	0.566223	0.647747	Potri.011G129000	1
	GO:0016567	protein ubiquitination	1/125	151/22436	0.571076	0.647747	Potri.009G040500	1
	GO:0005737	cytoplasm	2/125	345/22436	0.575235	0.647747	Potri.007G074201/Potri.001G161700	2
	GO:0030001	metal ion transport	1/125	154/22436	0.578253	0.647747	Potri.001G326100	1
	GO:0016788	hydrolase activity, acting on ester bonds	1/125	156/22436	0.582972	0.647747	Potri.002G216000	1
	GO:0003723	RNA binding	2/125	362/22436	0.601511	0.660874	Potri.007G065500/Potri.010G201100	2
	GO:0004842	ubiquitin-protein transferase activity	1/125	167/22436	0.608004	0.660874	Potri.009G040500	1
	GO:0050660	flavin adenine dinucleotide binding	1/125	172/22436	0.618884	0.665019	Potri.016G064800	1
	GO:0004553	hydrolase activity, hydrolyzing O-glycosyl compounds	2/125	378/22436	0.625118	0.665019	Potri.005G201200/Potri.002G100900	2
	GO:0016705	oxidoreductase activity, acting on paired donors, with incorporation or reduction of molecular oxygen	2/125	396/22436	0.650378	0.684609	Potri.004G017800/Potri.007G050000	2
	GO:0004674	protein serine/threonine kinase activity	1/125	215/22436	0.700902	0.730106	Potri.011G129000	1
	GO:0016758	hexosyltransferase activity	1/125	240/22436	0.740264	0.758348	Potri.014G041800	1
	GO:0008168	methyltransferase activity	1/125	242/22436	0.743181	0.758348	Potri.003G100000	1
	GO:0004497	monooxygenase activity	1/125	316/22436	0.83103	0.83103	Potri.004G017800	1
	GO:0043565	sequence-specific DNA binding	1/125	316/22436	0.83103	0.83103	Potri.004G058200	1
	GO:0046983	protein dimerization activity	1/125	392/22436	0.89024	0.881426	Potri.004G131100	1
H	GO:0005801	cis-Golgi network	2/90	10/22436	0.00070127	0.0631143	Potri.003G183400/Potri.003G180800	2
	GO:0006888	endoplasmic reticulum to Golgi vesicle-mediated transport	2/90	27/22436	0.00523286	0.185445	Potri.003G183400/Potri.003G180800	2
	GO:0004129	cytochrome-c oxidase activity	2/90	32/22436	0.00729917	0.185445	Potri.004G005900/Potri.011G009900	2
	GO:0043531	ADP binding	5/90	310/22436	0.00824198	0.185445	Potri.011G005700/Potri.011G008420/Potri.011G008740/Potri.017G035300/Potri.011G040800	5
	GO:0016758	hexosyltransferase activity	4/90	240/22436	0.0159422	0.275832	Potri.004G071000/Potri.014G041800/Potri.014G131600/Potri.004G070000	4
	GO:0005783	endoplasmic reticulum	2/90	58/22436	0.0227444	0.275832	Potri.011G007200/Potri.014G131600	2
	GO:0007275	multicellular organism development	2/90	61/22436	0.0249861	0.275832	Potri.012G006100/Potri.003G215400	2
	GO:0009767	photosynthetic electron transport chain	1/90	11/22436	0.0432605	0.275832	Potri.017G140700	1
	GO:0006207	'de novo' pyrimidine nucleobase biosynthetic process	1/90	12/22436	0.0471003	0.275832	Potri.015G129000	1
	GO:0016168	chlorophyll binding	1/90	12/22436	0.0471003	0.275832	Potri.017G140700	1
	GO:0042651	thylakoid membrane	1/90	12/22436	0.0471003	0.275832	Potri.001G292000	1
	GO:0000139	Golgi membrane	1/90	13/22436	0.0509248	0.275832	Potri.003G180800	1
	GO:0005199	structural constituent of cell wall	1/90	13/22436	0.0509248	0.275832	Potri.003G204450	1
	GO:0000045	autophagosome assembly	1/90	14/22436	0.0547341	0.275832	Potri.011G004300	1
	GO:0006221	pyrimidine nucleotide biosynthetic process	1/90	14/22436	0.0547341	0.275832	Potri.015G129000	1
	GO:0007165	signal transduction	4/90	359/22436	0.0564954	0.275832	Potri.011G008548/Potri.011G008740/Potri.001G252100/Potri.010G054300	4
	GO:0003872	6-phosphofructokinase activity	1/90	15/22436	0.0585283	0.275832	Potri.006G152600	1
	GO:0019205	nucleobase-containing compound kinase activity	1/90	15/22436	0.0585283	0.275832	Potri.015G129000	1
	GO:0031011	Ino80 complex	1/90	16/22436	0.0623075	0.275832	Potri.014G119600	1
	GO:0009089	lysine biosynthetic process via diaminopimelate	1/90	17/22436	0.0660716	0.275832	Potri.005G115800	1
	GO:0006367	transcription initiation from RNA polymerase II promoter	1/90	18/22436	0.0698208	0.275832	Potri.003G180800	1
	GO:0000159	protein phosphatase type 2A complex	1/90	19/22436	0.0735552	0.275832	Potri.010G054300	1
	GO:0008601	protein phosphatase regulator activity	1/90	19/22436	0.0735552	0.275832	Potri.010G054300	1
	GO:0016884	carbon-nitrogen ligase activity, with glutamine as amido-N-donor	1/90	19/22436	0.0735552	0.275832	Potri.004G171000	1
	GO:0016874	ligase activity	1/90	22/22436	0.0846694	0.299678	Potri.018G146300	1
	GO:0019684	photosynthesis, light reaction	1/90	23/22436	0.0883448	0.299678	Potri.017G140700	1
	GO:0009058	biosynthetic process	2/90	125/22436	0.0899035	0.299678	Potri.005G115800/Potri.003G176700	2
	GO:0008378	galactosyltransferase activity	1/90	27/22436	0.102901	0.319444	Potri.011G004200	1
	GO:0005743	mitochondrial inner membrane	1/90	30/22436	0.113667	0.319444	Potri.011G023100	1
	GO:0007186	G protein-coupled receptor signaling pathway	1/90	30/22436	0.113667	0.319444	Potri.005G253800	1
	GO:0009664	plant-type cell wall organization	1/90	31/22436	0.117227	0.319444	Potri.003G204450	1
	GO:0046873	metal ion transmembrane transporter activity	1/90	31/22436	0.117227	0.319444	Potri.003G183600	1
	GO:0048544	recognition of pollen	2/90	149/22436	0.12043	0.319444	Potri.011G037000/Potri.010G025500	2
	GO:0051537	2 iron, 2 sulfur cluster binding	1/90	32/22436	0.120773	0.319444	Potri.003G182100	1
	GO:0006508	proteolysis	4/90	479/22436	0.126577	0.319444	Potri.018G094400/Potri.001G291700/Potri.014G139500/Potri.003G185175	4
	GO:0005516	calmodulin binding	1/90	34/22436	0.127823	0.319444	Potri.001G292000	1
	GO:0009522	photosystem I	1/90	35/22436	0.131327	0.319444	Potri.001G292000	1
	GO:0008081	phosphoric diester hydrolase activity	1/90	37/22436	0.138293	0.327537	Potri.001G252100	1
	GO:0035556	intracellular signal transduction	1/90	40/22436	0.148639	0.342136	Potri.001G252100	1
	GO:0006869	lipid transport	1/90	41/22436	0.15206	0.342136	Potri.011G021900	1
	GO:0008610	lipid biosynthetic process	1/90	44/22436	0.162243	0.354879	Potri.003G176700	1
	GO:0006486	protein glycosylation	1/90	45/22436	0.16561	0.354879	Potri.011G004200	1
	GO:0006139	nucleobase-containing compound metabolic process	1/90	47/22436	0.172304	0.356569	Potri.015G129000	1
	GO:0046274	lignin catabolic process	1/90	49/22436	0.178946	0.356569	Potri.001G401100	1
	GO:0052716	hydroquinone:oxygen oxidoreductase activity	1/90	49/22436	0.178946	0.356569	Potri.001G401100	1
	GO:0004970	ionotropic glutamate receptor activity	1/90	50/22436	0.182246	0.356569	Potri.005G253800	1
	GO:0004185	serine-type carboxypeptidase activity	1/90	52/22436	0.188809	0.361548	Potri.001G291700	1
	GO:0006096	glycolytic process	1/90	61/22436	0.2177	0.405637	Potri.006G152600	1
	GO:0004222	metalloendopeptidase activity	1/90	62/22436	0.220847	0.405637	Potri.014G139500	1
	GO:0051536	iron-sulfur cluster binding	1/90	67/22436	0.236394	0.425508	Potri.003G182100	1
	GO:0006511	ubiquitin-dependent protein catabolic process	1/90	74/22436	0.257645	0.442583	Potri.003G215400	1
	GO:0030599	pectinesterase activity	1/90	75/22436	0.260632	0.442583	Potri.018G051400	1
	GO:0042545	cell wall modification	1/90	75/22436	0.260632	0.442583	Potri.018G051400	1
	GO:0008289	lipid binding	1/90	78/22436	0.269524	0.449207	Potri.011G021900	1
	GO:0005871	kinesin complex	1/90	83/22436	0.28411	0.45185	Potri.011G031200	1
	GO:0003777	microtubule motor activity	1/90	85/22436	0.289863	0.45185	Potri.011G031200	1
	GO:0007018	microtubule-based movement	1/90	85/22436	0.289863	0.45185	Potri.011G031200	1
	GO:0022857	transmembrane transporter activity	1/90	89/22436	0.301233	0.45185	Potri.011G148400	1
	GO:0030170	pyridoxal phosphate binding	1/90	89/22436	0.301233	0.45185	Potri.005G115800	1
	GO:0048046	apoplast	1/90	89/22436	0.301233	0.45185	Potri.001G401100	1
	GO:0016757	glycosyltransferase activity	1/90	94/22436	0.315193	0.465038	Potri.015G061800	1
	GO:0004190	aspartic-type endopeptidase activity	1/90	98/22436	0.326161	0.47346	Potri.003G185175	1
	GO:0005507	copper ion binding	1/90	102/22436	0.336956	0.481366	Potri.001G401100	1
	GO:0004722	protein serine/threonine phosphatase activity	1/90	106/22436	0.34758	0.488784	Potri.010G006200	1
	GO:0008017	microtubule binding	1/90	109/22436	0.355437	0.492144	Potri.011G031200	1
	GO:0004857	enzyme inhibitor activity	1/90	112/22436	0.363201	0.494765	Potri.018G051400	1
	GO:0015979	photosynthesis	1/90	114/22436	0.368325	0.494765	Potri.001G292000	1
	GO:0005618	cell wall	1/90	118/22436	0.378452	0.500892	Potri.018G051400	1
	GO:0007264	small GTPase mediated signal transduction	1/90	123/22436	0.390885	0.509849	Potri.011G024000	1
	GO:0004601	peroxidase activity	1/90	131/22436	0.410267	0.523074	Potri.009G015400	1
	GO:0006470	protein dephosphorylation	1/90	132/22436	0.412647	0.523074	Potri.010G006200	1
	GO:0006979	response to oxidative stress	1/90	139/22436	0.42904	0.531795	Potri.009G015400	1
	GO:0004252	serine-type endopeptidase activity	1/90	140/22436	0.431345	0.531795	Potri.018G094400	1
	GO:0016567	protein ubiquitination	1/90	151/22436	0.456096	0.553017	Potri.003G215400	1
	GO:0030001	metal ion transport	1/90	154/22436	0.46266	0.553017	Potri.003G183600	1
	GO:0016788	hydrolase activity, acting on ester bonds	1/90	156/22436	0.466992	0.553017	Potri.002G216000	1
	GO:0004842	ubiquitin-protein transferase activity	1/90	167/22436	0.490208	0.572971	Potri.003G215400	1
	GO:0006629	lipid metabolic process	1/90	189/22436	0.533682	0.610142	Potri.001G252100	1
	GO:0009055	electron transfer activity	1/90	190/22436	0.535569	0.610142	Potri.003G182100	1
	GO:0016747	acyltransferase activity, transferring groups other than amino-acyl groups	1/90	200/22436	0.554024	0.623277	Potri.003G176700	1
	GO:0004674	protein serine/threonine kinase activity	1/90	215/22436	0.580354	0.644838	Potri.011G037000	1
	GO:0016887	ATP hydrolysis activity	1/90	225/22436	0.597048	0.655296	Potri.014G139500	1
	GO:0006886	intracellular protein transport	1/90	254/22436	0.641834	0.695965	Potri.011G007200	1
	GO:0016787	hydrolase activity	1/90	338/22436	0.745616	0.797063	Potri.011G023000	1
	GO:0005737	cytoplasm	1/90	345/22436	0.752781	0.797063	Potri.011G004300	1
	GO:0046983	protein dimerization activity	1/90	392/22436	0.795984	0.833006	Potri.015G063300	1
	GO:0005840	ribosome	1/90	421/22436	0.818821	0.847057	Potri.003G178800	1
	GO:0006810	transport	1/90	435/22436	0.828923	0.847484	Potri.003G183400	1
	GO:0003735	structural constituent of ribosome	1/90	451/22436	0.839787	0.847484	Potri.003G178800	1
	GO:0006412	translation	1/90	463/22436	0.847484	0.847484	Potri.003G178800	1

## Sheet: Table S7
Table S7. Information on the KEGG annotated from the Corresponding gene with 8 wood property traits.
Trait	ID	Description	GeneRatio	BgRatio	pvalue	p.adjust	geneID	Count
FL	ko00909	Sesquiterpenoid and triterpenoid biosynthesis	1/5	23/5822	0.0196039	0.0408984	Potri.007G007600	1
	ko03430	Mismatch repair	1/5	24/5822	0.0204492	0.0408984	Potri.015G041400	1
	ko00480	Glutathione metabolism	1/5	115/5822	0.0949693	0.126626	Potri.011G114000	1
	ko03010	Ribosome	1/5	412/5822	0.307263	0.307263	Potri.010G005000	1
FW	ko03010	Ribosome	4/10	412/5822	0.00368211	0.0257747	Potri.016G061100/Potri.016G143100/Potri.004G029400/Potri.015G071700	4
	ko00051	Fructose and mannose metabolism	1/10	21/5822	0.0355172	0.12431	Potri.006G109900	1
	ko03013	Nucleocytoplasmic transport	1/10	68/5822	0.110928	0.258832	Potri.015G026200	1
	ko00040	Pentose and glucuronate interconversions	1/10	101/5822	0.16066	0.259404	Potri.010G011200	1
	ko03018	RNA degradation	1/10	118/5822	0.185289	0.259404	Potri.018G020900	1
	ko00520	Amino sugar and nucleotide sugar metabolism	1/10	153/5822	0.233959	0.272286	Potri.008G010000	1
	ko04144	Endocytosis	1/10	182/5822	0.272286	0.272286	Potri.003G019100	1
DWT	ko00190	Oxidative phosphorylation	2/13	111/5822	0.0244997	0.119816	Potri.018G006000/Potri.006G082500	2
	ko00250	Alanine, aspartate and glutamate metabolism	1/13	18/5822	0.0394951	0.119816	Potri.004G164000	1
	ko00790	Folate biosynthesis	1/13	24/5822	0.0523368	0.119816	Potri.001G352800	1
	ko00410	beta-Alanine metabolism	1/13	25/5822	0.0544616	0.119816	Potri.002G057700	1
	ko00511	Other glycan degradation	1/13	25/5822	0.0544616	0.119816	Potri.014G143600	1
	ko00906	Carotenoid biosynthesis	1/13	42/5822	0.0899171	0.164848	Potri.013G053100	1
	ko04146	Peroxisome	1/13	115/5822	0.228659	0.359322	Potri.015G041700	1
	ko00520	Amino sugar and nucleotide sugar metabolism	1/13	153/5822	0.292888	0.381482	Potri.011G103700	1
	ko00940	Phenylpropanoid biosynthesis	1/13	165/5822	0.312121	0.381482	Potri.008G038200	1
	ko04141	Protein processing in endoplasmic reticulum	1/13	194/5822	0.356626	0.392288	Potri.015G028300	1
	ko04075	Plant hormone signal transduction	1/13	346/5822	0.549476	0.549476	Potri.002G125400	1
CLD	ko00250	Alanine, aspartate and glutamate metabolism	1/7	18/5822	0.0214533	0.150173	Potri.004G164000	1
	ko00040	Pentose and glucuronate interconversions	1/7	101/5822	0.115352	0.233799	Potri.010G011200	1
	ko04146	Peroxisome	1/7	115/5822	0.130403	0.233799	Potri.010G192600	1
	ko03018	RNA degradation	1/7	118/5822	0.133599	0.233799	Potri.009G072500	1
	ko00940	Phenylpropanoid biosynthesis	1/7	165/5822	0.182379	0.246501	Potri.006G169700	1
	ko04141	Protein processing in endoplasmic reticulum	1/7	194/5822	0.211287	0.246501	Potri.015G071400	1
	ko04075	Plant hormone signal transduction	1/7	346/5822	0.348912	0.348912	Potri.002G125400	1
AD	ko04144	Endocytosis	3/13	182/5822	0.00681869	0.0681869	Potri.006G154000/Potri.002G249500/Potri.004G189700	3
	ko00950	Isoquinoline alkaloid biosynthesis	1/13	11/5822	0.0243103	0.0879476	Potri.001G388600	1
	ko00030	Pentose phosphate pathway	1/13	12/5822	0.026493	0.0879476	Potri.008G097200	1
	ko00310	Lysine degradation	1/13	16/5822	0.035179	0.0879476	Potri.002G237950	1
	ko01040	Biosynthesis of unsaturated fatty acids	1/13	22/5822	0.048074	0.0961479	Potri.002G209602	1
	ko00592	alpha-Linolenic acid metabolism	1/13	47/5822	0.100109	0.148795	Potri.008G106400	1
	ko03020	RNA polymerase	1/13	49/5822	0.104156	0.148795	Potri.008G106900	1
	ko03008	Ribosome biogenesis in eukaryotes	1/13	80/5822	0.164779	0.205973	Potri.002G194100	1
	ko03018	RNA degradation	1/13	118/5822	0.233919	0.25991	Potri.002G252900	1
	ko04141	Protein processing in endoplasmic reticulum	1/13	194/5822	0.356626	0.356626	Potri.011G000900	1
BD	ko00950	Isoquinoline alkaloid biosynthesis	1/5	11/5822	0.00941452	0.0341758	Potri.001G388600	1
	ko00310	Lysine degradation	1/5	16/5822	0.0136703	0.0341758	Potri.002G237950	1
	ko00061	Fatty acid biosynthesis	1/5	26/5822	0.0221381	0.0368968	Potri.002G245600	1
	ko04120	Ubiquitin mediated proteolysis	1/5	177/5822	0.14309	0.146879	Potri.011G111400	1
	ko04144	Endocytosis	1/5	182/5822	0.146879	0.146879	Potri.002G249500	1
DBH	ko00270	Cysteine and methionine metabolism	2/33	72/5822	0.0622647	0.44237	Potri.008G157400/Potri.003G100000	2
	ko00630	Glyoxylate and dicarboxylate metabolism	1/33	15/5822	0.0818249	0.44237	Potri.015G092000	1
	ko04144	Endocytosis	3/33	182/5822	0.0827166	0.44237	Potri.002G016100/Potri.015G039700/Potri.017G078800	3
	ko00500	Starch and sucrose metabolism	2/33	85/5822	0.0831346	0.44237	Potri.018G149500/Potri.002G100900	2
	ko00350	Tyrosine metabolism	1/33	23/5822	0.122771	0.44237	Potri.007G108500	1
	ko00670	One carbon pool by folate	1/33	25/5822	0.132727	0.44237	Potri.001G212000	1
	ko00061	Fatty acid biosynthesis	1/33	26/5822	0.137664	0.44237	Potri.018G146300	1
	ko03250	Viral life cycle - HIV-1	1/33	28/5822	0.147457	0.44237	Potri.005G097400	1
	ko03022	Basal transcription factors	1/33	39/5822	0.199417	0.471126	Potri.012G119500	1
	ko00240	Pyrimidine metabolism	1/33	43/5822	0.21754	0.471126	Potri.009G157500	1
	ko00620	Pyruvate metabolism	1/33	48/5822	0.239634	0.471126	Potri.016G064800	1
	ko00860	Porphyrin metabolism	1/33	48/5822	0.239634	0.471126	Potri.002G216100	1
	ko04712	Circadian rhythm - plant	1/33	54/5822	0.26535	0.471126	Potri.013G000300	1
	ko00900	Terpenoid backbone biosynthesis	1/33	64/5822	0.306346	0.471126	Potri.017G073200	1
	ko04075	Plant hormone signal transduction	3/33	346/5822	0.312326	0.471126	Potri.002G108000/Potri.010G102900/Potri.004G165500	3
	ko03013	Nucleocytoplasmic transport	1/33	68/5822	0.322116	0.471126	Potri.002G125300	1
	ko00710	Carbon fixation in photosynthetic organisms	1/33	71/5822	0.333714	0.471126	Potri.005G191400	1
	ko03050	Proteasome	1/33	79/5822	0.363711	0.484948	Potri.001G161700	1
	ko03010	Ribosome	3/33	412/5822	0.416702	0.52636	Potri.006G132450/Potri.016G085800/Potri.008G076100	3
	ko04146	Peroxisome	1/33	115/5822	0.48325	0.5799	Potri.014G169400	1
	ko00520	Amino sugar and nucleotide sugar metabolism	1/33	153/5822	0.585749	0.667839	Potri.012G064500	1
	ko00940	Phenylpropanoid biosynthesis	1/33	165/5822	0.613804	0.667839	Potri.002G018300	1
	ko04120	Ubiquitin mediated proteolysis	1/33	177/5822	0.640012	0.667839	Potri.008G215100	1
	ko04141	Protein processing in endoplasmic reticulum	1/33	194/5822	0.674209	0.674209	Potri.018G141100	1
H	ko00513	Various types of N-glycan biosynthesis	1/27	21/5822	0.0931554	0.372308	Potri.014G131600	1
	ko00511	Other glycan degradation	1/27	25/5822	0.109925	0.372308	Potri.003G178000	1
	ko00670	One carbon pool by folate	1/27	25/5822	0.109925	0.372308	Potri.011G006800	1
	ko00061	Fatty acid biosynthesis	1/27	26/5822	0.114071	0.372308	Potri.018G146300	1
	ko00380	Tryptophan metabolism	1/27	27/5822	0.118198	0.372308	Potri.004G171000	1
	ko00240	Pyrimidine metabolism	1/27	43/5822	0.181765	0.372308	Potri.015G129000	1
	ko04070	Phosphatidylinositol signaling system	1/27	45/5822	0.189394	0.372308	Potri.001G252100	1
	ko04130	SNARE interactions in vesicular transport	1/27	45/5822	0.189394	0.372308	Potri.003G180800	1
	ko04120	Ubiquitin mediated proteolysis	2/27	177/5822	0.197501	0.372308	Potri.008G041300/Potri.003G215400	2
	ko00620	Pyruvate metabolism	1/27	48/5822	0.200708	0.372308	Potri.010G038400	1
	ko04136	Autophagy - other	1/27	50/5822	0.208167	0.372308	Potri.011G004300	1
	ko00564	Glycerophospholipid metabolism	1/27	54/5822	0.222883	0.372308	Potri.011G023000	1
	ko04712	Circadian rhythm - plant	1/27	54/5822	0.222883	0.372308	Potri.003G176700	1
	ko04141	Protein processing in endoplasmic reticulum	2/27	194/5822	0.226622	0.372308	Potri.011G007200/Potri.015G068900	2
	ko03013	Nucleocytoplasmic transport	1/27	68/5822	0.272344	0.417594	Potri.003G180000	1
	ko04626	Plant-pathogen interaction	2/27	262/5822	0.344701	0.489227	Potri.011G022000/Potri.017G035300	2
	ko00040	Pentose and glucuronate interconversions	1/27	101/5822	0.377227	0.489227	Potri.018G051400	1
	ko00480	Glutathione metabolism	1/27	115/5822	0.417181	0.489227	Potri.009G015400	1
	ko04146	Peroxisome	1/27	115/5822	0.417181	0.489227	Potri.011G007100	1
	ko03018	RNA degradation	1/27	118/5822	0.425415	0.489227	Potri.006G152600	1
	ko03015	mRNA surveillance pathway	1/27	144/5822	0.492238	0.536919	Potri.010G054300	1
	ko00520	Amino sugar and nucleotide sugar metabolism	1/27	153/5822	0.513575	0.536919	Potri.013G067300	1
	ko03010	Ribosome	1/27	412/5822	0.862793	0.862793	Potri.003G180700	1

## Sheet: Table S8
Table S8. Expression level of the candidate genes in CL290 and CL33.
ID	CL290	CL33
Potri.008G038200	420.17	482.333
Potri.008G221200	345.785	784.421
Potri.009G015400	334.763	397.314
Potri.002G108000	289.539	349.759
Potri.016G015500	227.916	60.1044
Potri.013G067300	214.024	130.688
Potri.001G027100	202.878	51.2805
Potri.011G007100	193.041	212.212
Potri.006G139500	189.38	116.986
Potri.001G356900	187.046	213.936
Potri.004G096000	145.701	352.542
Potri.019G018100	136.661	171.862
Potri.001G000900	124.7	89.7764
Potri.009G027300	115.719	368.841
Potri.011G111400	113.791	104.049
Potri.003G050100	113.774	114.661
Potri.006G036300	111.686	133.568
Potri.003G114000	92.3046	110.526
Potri.010G038400	83.9388	64.5277
Potri.006G154000	78.3153	79.1061
Potri.001G345300	72.2372	31.9044
Potri.006G109900	71.3684	60.9062
Potri.004G079900	70.1179	100.865
Potri.016G061100	67.9921	31.279
Potri.015G058500	67.9805	83.0662
Potri.002G249600	66.3498	144.44
Potri.001G401300	65.5844	64.4027
Potri.015G068900	65.4557	50.8244
Potri.002G024400	64.9141	59.078
Potri.011G023100	64.5476	78.3808
Potri.001G002000	60.683	134.503
Potri.016G085800	59.7571	40.6583
Potri.018G020900	53.2525	81.5668
Potri.006G169700	52.394	41.4242
Potri.002G026800	52.38	54.018
Potri.005G191400	51.998	83.6433
Potri.017G016200	51.5079	72.3398
Potri.010G163200	51.2919	39.0126
Potri.002G057700	49.1553	42.6476
Potri.001G161700	48.9067	45.566
Potri.008G076100	48.433	41.3248
Potri.014G131600	47.5821	20.2335
Potri.008G097200	46.6946	123.963
Potri.003G202500	46.172	70.0877
Potri.015G056000	45.1076	47.4487
Potri.002G094200	43.1944	100.399
Potri.014G191100	42.8572	34.7599
Potri.001G358300	42.5097	30.0267
Potri.003G156301	40.6895	59.3331
Potri.015G143700	37.5916	25.9214
Potri.010G090100	37.4888	38.4894
Potri.004G071000	36.161	29.5063
Potri.014G139500	36.1337	44.8567
Potri.019G051300	35.8063	40.1164
Potri.009G119900	34.9216	573.766
Potri.015G028300	32.6048	24.9976
Potri.008G041300	31.4437	26.2087
Potri.011G032700	31.1254	34.3706
Potri.014G169400	30.0769	30.8477
Potri.011G103700	29.6928	18.8644
Potri.002G253600	28.787	19.5503
Potri.004G161800	27.8393	35.9049
Potri.007G065500	27.3848	34.7804
Potri.013G018800	26.9201	18.9801
Potri.015G061800	26.751	17.0565
Potri.015G105100	26.5029	45.8611
Potri.003G178000	26.4832	26.0567
Potri.014G141800	25.6735	25.3989
Potri.011G006800	25.3188	16.597
Potri.010G192600	24.9458	30.1895
Potri.004G005900	24.3313	16.4867
Potri.002G107902	24.0504	22.2811
Potri.011G007200	23.7521	18.3041
Potri.010G054300	23.5714	24.0495
Potri.002G251200	23.503	32.2581
Potri.005G076200	22.7256	19.2816
Potri.003G183400	22.63	20.4703
Potri.002G216100	22.1263	13.1085
Potri.011G024000	21.9702	18.6557
Potri.004G123300	21.747	20.3554
Potri.005G237500	21.3938	24.312
Potri.011G148400	20.5414	32.0294
Potri.003G215700	19.6747	19.8664
Potri.001G156500	19.6623	14.4626
Potri.007G139300	19.2823	24.432
Potri.011G009900	19.1989	22.1299
Potri.007G135500	19.0635	29.4397
Potri.010G034900	18.4101	17.8993
Potri.018G104900	18.2399	20.0136
Potri.011G000900	18.1473	18.9628
Potri.003G026510	17.788	18.2836
Potri.017G081500	17.1188	18.4612
Potri.017G069100	17.1	27.0209
Potri.006G082500	16.5798	11.7078
Potri.013G028200	16.331	24.0048
Potri.011G032900	16.11	18.3953
Potri.010G146100	15.7916	12.4855
Potri.007G069500	15.5576	14.0366
Potri.008G103000	15.5295	22.7427
Potri.004G029400	15.2614	7.75997
Potri.005G075600	15.1871	10.7888
Potri.013G000300	15.1281	16.0929
Potri.008G085400	15.0256	20.5337
Potri.011G010500	14.9589	8.53943
Potri.002G232600	14.8294	11.1458
Potri.015G071200	14.6852	21.3938
Potri.017G073200	14.5857	20.488
Potri.016G064800	14.4682	10.9105
Potri.012G006100	14.4258	15.2244
Potri.004G189700	14.4017	12.4264
Potri.011G023000	14.0487	15.0392
Potri.006G150000	13.9948	16.3373
Potri.006G175161	13.7386	17.6767
Potri.008G098600	13.4862	14.8708
Potri.009G072500	13.4649	17.6008
Potri.006G174900	13.4312	9.94369
Potri.018G141100	13.3098	13.8462
Potri.012G055800	13.0594	9.64405
Potri.003G180800	12.8684	11.0269
Potri.002G237950	12.6925	15.9968
Potri.017G058200	12.6178	14.6815
Potri.019G024200	12.37	8.85546
Potri.005G081500	12.3348	14.5117
Potri.004G048201	12.3206	5.92969
Potri.010G086700	12.2533	18.3804
Potri.015G071700	11.8626	10.5488
Potri.001G241300	11.8036	5.26619
Potri.010G201100	11.7689	18.1002
Potri.015G055500	11.6773	12.5658
Potri.015G082500	11.5367	13.3868
Potri.014G035600	11.3958	15.5912
Potri.011G089300	11.3192	13.4031
Potri.005G083100	11.0367	17.8164
Potri.014G143600	10.9706	13.2981
Potri.004G133600	10.9246	12.5528
Potri.011G031900	10.7866	14.3757
Potri.002G249500	10.6566	11.0691
Potri.009G119800	10.6439	6.1735
Potri.018G149500	10.5478	10.9525
Potri.002G125400	10.4197	16.3889
Potri.019G117500	10.3854	2.19418
Potri.004G066700	10.1764	15.4076
Potri.004G101250	10.1504	9.85707
Potri.002G245600	9.959	10.9584
Potri.003G172500	9.95821	16.5367
Potri.013G003200	9.95774	11.9277
Potri.004G119500	9.87142	10.9124
Potri.002G252700	9.86833	11.7458
Potri.016G134600	9.84865	30.6443
Potri.010G070750	9.60361	11.563
Potri.015G041700	9.4125	8.44824
Potri.008G107100	9.35461	11.3732
Potri.002G209900	9.3206	17.8213
Potri.012G064500	9.28648	7.33313
Potri.007G046700	9.23031	10.4664
Potri.001G031400	8.96634	10.481
Potri.015G039700	8.79658	12.7887
Potri.004G207600	8.74098	4.33706
Potri.005G216200	8.7253	15.7035
Potri.013G119700	8.69166	11.7418
Potri.003G099900	8.64331	7.26332
Potri.008G105000	8.62887	9.51546
Potri.004G138600	8.53188	8.28788
Potri.010G039466	8.47695	10.803
Potri.019G130900	8.42101	9.59367
Potri.015G055400	8.39606	10.8682
Potri.004G080100	8.36592	9.39711
Potri.003G204900	8.33868	10.2216
Potri.004G236000	8.29463	16.4708
Potri.014G170500	8.22707	8.65021
Potri.001G348800	8.08506	12.4975
Potri.014G119600	8.08474	7.98566
Potri.014G038300	7.8891	4.04845
Potri.007G067700	7.861	10.3353
Potri.005G074066	7.84729	8.44076
Potri.015G129000	7.82756	11.6496
Potri.005G130900	7.82369	28.4786
Potri.017G078800	7.80572	5.81847
Potri.002G252900	7.79023	7.0203
Potri.003G183600	7.72983	9.41572
Potri.006G117300	7.6113	9.8017
Potri.009G050200	7.58138	8.68975
Potri.018G051500	7.5807	10.3631
Potri.004G161700	7.54196	9.58109
Potri.013G000200	7.53359	8.51284
Potri.008G035200	7.49128	11.7564
Potri.003G046600	7.41339	11.0189
Potri.001G166800	7.23288	25.2211
Potri.006G054100	7.12511	12.1275
Potri.016G047600	6.94321	8.77673
Potri.005G076500	6.90555	2.98975
Potri.003G019100	6.86626	2.16161
Potri.005G120700	6.81616	2.8566
Potri.011G042500	6.80986	7.11252
Potri.008G159500	6.78881	39.3097
Potri.001G062700	6.64161	9.36777
Potri.012G005500	6.49777	5.12097
Potri.005G039100	6.39878	7.28075
Potri.010G087400	6.38079	7.18317
Potri.002G006300	6.36206	6.88984
Potri.015G058900	6.34779	6.40377
Potri.009G040500	6.23429	9.1369
Potri.012G102500	6.22544	8.54089
Potri.002G221000	6.17782	7.72762
Potri.013G099700	6.14735	6.13989
Potri.009G107500	6.11551	0
Potri.006G132450	6.0847	5.24927
Potri.010G102900	6.08445	7.00731
Potri.002G231700	6.02896	7.61506
Potri.007G108500	6.02706	2.51588
Potri.008G215100	6.00543	5.51496
Potri.010G250100	5.97937	9.58797
Potri.008G106400	5.90764	2.12832
Potri.001G252100	5.86179	1.50692
Potri.001G232900	5.71288	13.4636
Potri.006G069100	5.64943	6.52364
Potri.003G180700	5.60944	6.4203
Potri.010G040600	5.58538	6.59642
Potri.007G020500	5.58072	5.42336
Potri.001G229000	5.53	11.4306
Potri.015G103300	5.41894	4.97735
Potri.003G100000	5.21559	4.02416
Potri.008G101800	5.09115	7.01582
Potri.001G212000	5.05502	6.40592
Potri.001G352800	5.05244	5.41425
Potri.007G020732	5.04088	4.61608
Potri.006G059600	5.01319	20.4052
Potri.008G105100	4.99622	6.26705
Potri.005G144400	4.93137	6.44556
Potri.009G076500	4.89593	6.97153
Potri.006G016100	4.70514	5.04978
Potri.006G026600	4.6524	2.30065
Potri.002G068600	4.64018	8.1097
Potri.019G080900	4.55402	4.48401
Potri.005G097400	4.54219	7.04462
Potri.001G058600	4.52647	2.68986
Potri.008G025700	4.47304	4.76382
Potri.017G035300	4.47263	6.95116
Potri.003G178800	4.45016	4.66534
Potri.001G392801	4.40131	3.52429
Potri.013G003400	4.32194	7.47933
Potri.001G079800	4.22985	5.70466
Potri.009G157500	4.19764	4.89478
Potri.009G058500	4.11737	1.58736
Potri.011G004000	4.07188	2.05042
Potri.014G017600	4.06414	1.14188
Potri.015G071400	4.06236	4.97416
Potri.008G106900	4.04302	4.99796
Potri.010G148000	3.99558	5.56836
Potri.005G253800	3.90954	4.22762
Potri.001G450600	3.90755	3.21503
Potri.016G143100	3.90218	3.19677
Potri.003G126500	3.85383	5.29959
Potri.015G104100	3.78411	3.48916
Potri.006G052700	3.76609	8.81465
Potri.001G144500	3.74854	4.56318
Potri.001G376800	3.74304	5.32607
Potri.003G180000	3.61656	4.48462
Potri.002G100900	3.54722	12.704
Potri.002G250100	3.52199	1.25857
Potri.002G251800	3.47638	4.44335
Potri.018G146300	3.47197	2.02989
Potri.008G104300	3.46807	1.58166
Potri.003G053301	3.37536	4.68221
Potri.010G005000	3.32415	6.25127
Potri.001G114500	3.30769	2.28087
Potri.011G037000	3.19987	5.00984
Potri.010G130700	3.1904	4.69999
Potri.014G194500	3.16051	2.97302
Potri.019G021200	3.13229	5.84267
Potri.014G162000	3.08285	0.690221
Potri.003G183501	2.98996	2.21338
Potri.007G007600	2.95073	1.76024
Potri.017G069300	2.92038	3.60668
Potri.001G205400	2.80004	3.52079
Potri.005G075300	2.65668	0.753563
Potri.011G004800	2.60508	2.90879
Potri.007G063700	2.59011	3.81008
Potri.008G104100	2.56171	4.852
Potri.002G216000	2.51507	3.18116
Potri.003G182100	2.51079	2.93262
Potri.005G087200	2.47152	4.56092
Potri.010G101200	2.40761	1.73598
Potri.002G233800	2.36574	2.71451
Potri.006G259300	2.34574	1.59094
Potri.010G039000	2.2335	3.3797
Potri.010G137200	2.2156	1.25412
Potri.005G115800	2.15177	1.32235
Potri.006G168400	2.12987	2.24959
Potri.004G120800	2.11993	2.21202
Potri.008G029500	2.07187	4.74618
Potri.001G043700	2.06217	3.09182
Potri.010G078600	1.92694	1.96559
Potri.004G103300	1.88445	0.630191
Potri.004G164000	1.88192	3.42157
Potri.003G185175	1.84554	1.00149
Potri.003G215400	1.83378	0.825292
Potri.015G026200	1.81391	1.56918
Potri.006G091500	1.75809	2.40468
Potri.011G059101	1.73736	1.1131
Potri.012G040200	1.66385	1.06281
Potri.002G251400	1.64374	3.59173
Potri.017G020398	1.63507	0.316005
Potri.004G194800	1.62003	1.34037
Potri.011G005601	1.5585	2.82174
Potri.011G031200	1.51677	0.321184
Potri.010G239400	1.45956	1.87682
Potri.002G194100	1.39415	1.88927
Potri.014G038000	1.37215	3.84917
Potri.002G030200	1.37057	1.89445
Potri.013G110300	1.35183	0.0677229
Potri.001G168600	1.35039	2.71065
Potri.017G019300	1.31978	2.25503
Potri.002G024966	1.28681	1.87059
Potri.003G219300	1.28337	0.286361
Potri.010G007833	1.26818	0
Potri.019G010600	1.21401	4.26415
Potri.003G180400	1.20624	0.4359
Potri.017G116200	1.18987	0.415706
Potri.013G003100	1.14547	1.83973
Potri.014G192701	1.13607	0.156026
Potri.010G025500	1.12704	1.76504
Potri.010G036400	1.0729	6.27454
Potri.006G199200	1.07115	0.901781
Potri.003G009300	1.05373	1.93362
Potri.011G008420	1.05288	0.38997
Potri.005G051100	0.98714	1.36542
Potri.017G035401	0.931685	1.37718
Potri.012G021900	0.921961	0.532736
Potri.001G443025	0.908326	1.13861
Potri.004G070000	0.908087	0.612157
Potri.004G015800	0.885756	0.796415
Potri.008G130700	0.858067	1.72369
Potri.005G085700	0.857508	0.361993
Potri.014G156100	0.841469	0.392786
Potri.014G163100	0.772299	0.535312
Potri.011G165500	0.75758	0.538833
Potri.016G121900	0.753579	0.130851
Potri.015G105900	0.749166	1.20481
Potri.013G112200	0.739878	0.795715
Potri.007G011600	0.729151	0.299134
Potri.006G122100	0.713241	0.937294
Potri.011G040800	0.700183	0.481169
Potri.004G134300	0.690996	1.35054
Potri.012G119500	0.639101	1.26192
Potri.015G018000	0.625135	4.12593
Potri.001G422000	0.615352	0.143745
Potri.011G004200	0.61523	0.47423
Potri.015G035400	0.585325	0.1606
Potri.013G157500	0.582921	0.192261
Potri.003G182000	0.552089	0.184389
Potri.016G034000	0.523185	0.317085
Potri.002G018300	0.510039	2.56913
Potri.002G208251	0.500631	0.171553
Potri.008G040000	0.487651	1.09064
Potri.004G058200	0.473953	0.149115
Potri.011G114000	0.473297	0.326553
Potri.003G200080	0.47262	1.46773
Potri.011G165600	0.469991	0.81949
Potri.017G071600	0.460696	0.678952
Potri.015G093100	0.45602	0.142614
Potri.010G104600	0.451255	4.26391
Potri.013G006700	0.413695	0.682719
Potri.014G084200	0.406002	0.454243
Potri.003G185401	0.381749	0.0578077
Potri.012G001400	0.378155	1.32426
Potri.011G002700	0.374108	0.0956101
Potri.006G216300	0.364694	0.190198
Potri.003G060000	0.335569	0.207246
Potri.008G104700	0.334637	0.0954213
Potri.002G250900	0.329164	1.78784
Potri.011G023500	0.316856	0.0335999
Potri.008G223987	0.301221	0.633667
Potri.017G032100	0.299673	0.335984
Potri.009G028800	0.299661	0.421267
Potri.010G121600	0.280919	0.148554
Potri.014G157800	0.267546	0.400326
Potri.004G197900	0.244414	2.95331
Potri.007G141900	0.238581	0.223717
Potri.001G388600	0.238186	0.0874144
Potri.005G010700	0.236578	2.67002
Potri.018G006000	0.235138	1.18967
Potri.006G021000	0.233068	0.157492
Potri.004G171000	0.228758	0.19813
Potri.008G093000	0.222736	0.37011
Potri.010G006700	0.22019	0.0367792
Potri.010G006200	0.21873	1.58395
Potri.004G131100	0.208269	0
Potri.004G234500	0.201324	0.195142
Potri.013G039700	0.201108	0.0312406
Potri.015G059301	0.193022	0.0319839
Potri.004G113000	0.190388	0.366629
Potri.018G104500	0.181698	1.04238
Potri.015G041400	0.168936	0.0408363
Potri.005G122500	0.166518	0.214758
Potri.014G036700	0.165851	0.232141
Potri.001G070700	0.162838	0.571231
Potri.015G103000	0.152077	0.211843
Potri.007G074201	0.132622	0.150163
Potri.003G065701	0.121971	0
Potri.006G219100	0.121687	0.235042
Potri.008G122100	0.117064	0.170341
Potri.014G001700	0.11453	0.198477
Potri.003G120500	0.109456	0.120425
Potri.013G053100	0.109088	0.175329
Potri.005G032600	0.0996174	0.195829
Potri.008G086000	0.0962969	0.153566
Potri.007G050000	0.0960897	0.0176548
Potri.011G036100	0.0960553	0.282961
Potri.007G039901	0.0958833	0.111276
Potri.002G244500	0.0926938	0.186898
Potri.009G064200	0.0808861	0.0251653
Potri.013G036000	0.0773087	0.0743111
Potri.001G401100	0.0768807	0.132408
Potri.007G093850	0.0768658	0.12088
Potri.006G083850	0.0705652	0
Potri.002G249550	0.069848	1.06978
Potri.002G016100	0.0630677	0.0643352
Potri.011G008548	0.062569	0
Potri.015G106300	0.0567946	0.105672
Potri.002G125300	0.0529917	0.266563
Potri.015G103100	0.049736	0.0455692
Potri.019G129400	0.04658	0.0772865
Potri.011G019500	0.0419462	0
Potri.011G037800	0.0404558	0.276281
Potri.011G019750	0.0402384	0.0911043
Potri.016G020400	0.0390755	0.0230788
Potri.011G019200	0.0387451	0.32172
Potri.001G447700	0.0381596	0
Potri.014G154500	0.0341863	0.0345504
Potri.013G123401	0.0340717	0.0329276
Potri.013G159500	0.0339725	0.136915
Potri.004G025800	0.0335954	0.067439
Potri.001G326100	0.0317918	0
Potri.011G021900	0.0307166	0
Potri.001G355200	0.0299758	0.0592597
Potri.001G229900	0.0296101	0
Potri.001G420000	0.0283582	0.0223128
Potri.011G005700	0.0224737	0.431804
Potri.016G137600	0.0218126	0.00697666
Potri.004G052400	0.0214011	0.00389587
Potri.003G213300	0.0201213	0
Potri.014G030200	0.0196827	0.0789042
Potri.019G095200	0.0192789	0
Potri.006G152600	0.0179111	0.0466275
Potri.012G116170	0.0174838	0.00444385
Potri.002G252400	0.016601	0
Potri.012G088400	0.0142729	0
Potri.007G003800	0.0138414	0.0143934
Potri.015G076300	0.0119205	0.0492164
Potri.008G224084	0.0116739	0.317835
Potri.012G120768	0.0106304	0
Potri.013G062700	0.00928619	0.0049567
Potri.008G203300	0.00906067	0
Potri.012G059100	0.00888154	0.160432
Potri.003G181600	0.00782671	0.0239435
Potri.001G025200	0.00632293	0.0572881
Potri.018G077983	0.00567073	0.00531195
Potri.006G091600	0.00550122	0.0218049
Potri.019G070393	0.0052873	0.195536
Potri.016G126900	0.00445903	0.0931264
Potri.010G165800	0.00407392	0.0244524
Potri.014G075200	0.00360785	0.0426466
Potri.011G021400	0.00355576	0
Potri.012G067600	0.00354908	0.0136105
Potri.014G129000	0	0.502967
Potri.001G268400	0	0.193672
Potri.001G451600	0	0.0717546
Potri.004G191101	0	0.0349943
Potri.005G201200	0	0.0319252
Potri.014G041800	0	0.0298568
Potri.004G142900	0	0.0275366
Potri.016G052500	0	0.0253726
Potri.011G022000	0	0.019119
Potri.017G066200	0	0.0188741
Potri.018G056301	0	0.0148323
Potri.010G129000	0	0.0147256
Potri.001G291700	0	0.0135424
Potri.013G093100	0	0.0122507
Potri.008G013900	0	0.0108811
Potri.011G129000	0	0.00946967
Potri.004G017800	0	0.00848458
Potri.003G055501	0	0.00738785
Potri.016G018001	0	0.00696239
Potri.005G235500	0	0.00692359
Potri.009G057900	0	0.00526028
Potri.011G016400	0	0.00448053
Potri.001G014200	0	0
Potri.001G108600	0	0
Potri.001G142900	0	0
Potri.001G175900	0	0
Potri.001G212200	0	0
Potri.001G217050	0	0
Potri.001G292000	0	0
Potri.001G347200	0	0
Potri.001G392050	0	0
Potri.001G414677	0	0
Potri.002G097132	0	0
Potri.002G209602	0	0
Potri.002G252050	0	0
Potri.002G253100	0	0
Potri.003G019900	0	0
Potri.003G057700	0	0
Potri.003G176700	0	0
Potri.003G184300	0	0
Potri.003G204450	0	0
Potri.004G008000	0	0
Potri.004G048000	0	0
Potri.004G124200	0	0
Potri.004G165500	0	0
Potri.005G030100	0	0
Potri.005G065300	0	0
Potri.005G084400	0	0
Potri.005G153600	0	0
Potri.005G228550	0	0
Potri.006G061300	0	0
Potri.007G067000	0	0
Potri.008G010000	0	0
Potri.008G097800	0	0
Potri.008G104600	0	0
Potri.008G157400	0	0
Potri.008G163100	0	0
Potri.008G205550	0	0
Potri.008G208100	0	0
Potri.008G210650	0	0
Potri.009G136501	0	0
Potri.009G142600	0	0
Potri.010G000301	0	0
Potri.010G011200	0	0
Potri.010G042400	0	0
Potri.011G004300	0	0
Potri.011G008740	0	0
Potri.011G021332	0	0
Potri.011G025100	0	0
Potri.011G025300	0	0
Potri.011G026100	0	0
Potri.011G158100	0	0
Potri.012G001900	0	0
Potri.012G044150	0	0
Potri.013G003301	0	0
Potri.013G157250	0	0
Potri.014G054900	0	0
Potri.014G136532	0	0
Potri.014G186733	0	0
Potri.015G015275	0	0
Potri.015G045300	0	0
Potri.015G050601	0	0
Potri.015G063300	0	0
Potri.015G067700	0	0
Potri.015G092000	0	0
Potri.016G016200	0	0
Potri.016G106100	0	0
Potri.016G130950	0	0
Potri.017G006500	0	0
Potri.017G031450	0	0
Potri.017G063966	0	0
Potri.017G067900	0	0
Potri.017G072950	0	0
Potri.017G140700	0	0
Potri.017G141700	0	0
Potri.018G051400	0	0
Potri.018G053400	0	0
Potri.018G094400	0	0
Potri.018G113901	0	0
Potri.019G126700	0	0

## Sheet: Table S9
Table S9. Differential expression of candidate genes between CL290 and CL33.
ID	CL290	CL33	log2FoldChange	p-value	threshold
Potri.004G197900.v4.1	39.2227	429.107	3.44868	3.76e-35	Up
Potri.005G010700.v4.1	6.57218	66.4483	3.33329	3.45e-11	Up
Potri.010G104600.v4.1	26.6709	225.273	3.08094	1.81e-10	Up
Potri.009G119900.v4.1	694.413	9778.56	3.81574	1.41e-09	Up
Potri.008G159500.v4.1	582.503	2984.5	2.35699	1.47e-07	Up
Potri.010G006200.v4.1	11.9763	77.4757	2.6849	2.17e-07	Up
Potri.014G129000.v4.1	0	18.2683	6.56735	4.92e-06	Up
Potri.019G070393.v4.1	0.72421	23.7485	5.08315	2.01e-05	Up
Potri.010G036400.v4.1	46.6507	245.578	2.39401	3.16e-05	Up
Potri.002G018300.v4.1	18.4473	84.874	2.19335	3.71e-05	Up
Potri.011G019200.v4.1	2.80861	21.7393	2.95469	0.00014942	Up
Potri.002G249550.v4.1	1.68462	24.3274	3.8257	0.000184956	Up
Potri.011G005700.v4.1	2.6267	47.2189	4.14115	0.000431393	Up
Potri.015G018000.v4.1	36.372	218.385	2.58432	0.00143199	Up
Potri.008G224084.v4.1	0.368548	8.54126	4.50783	0.00383974	Up
Potri.011G037800.v4.1	3.0577	17.9841	2.54451	0.00501369	Up
Potri.016G126900.v4.1	0.355661	6.54245	4.12624	0.0138086	Up
Potri.012G059100.v4.1	0.355661	6.07432	4.01345	0.0138572	Up
Potri.018G104500.v4.1	2.79572	14.416	2.37198	0.0150147	Up
Potri.018G006000.v4.1	22.2957	107.102	2.26156	0.0224691	Up
Potri.002G250900.v4.1	5.02265	24.8802	2.29593	0.0242452	Up
Potri.006G059600.v4.1	390.189	1406.35	1.84988	5.4e-10	NoSignifi
Potri.016G134600.v4.1	767.489	2175.17	1.50248	1.79e-07	NoSignifi
Potri.005G076500.v4.1	400.467	156.736	-1.3519	3.41e-07	NoSignifi
Potri.002G100900.v4.1	292.468	956.632	1.70888	4.39e-07	NoSignifi
Potri.014G131600.v4.1	2036.1	791.584	-1.36343	1.02e-06	NoSignifi
Potri.008G221200.v4.1	7921.15	16327.7	1.04358	1.09e-06	NoSignifi
Potri.005G075300.v4.1	80.9872	21.8434	-1.90098	1.35e-06	NoSignifi
Potri.011G008420.v4.1	86.4319	28.5504	-1.595	1.87e-06	NoSignifi
Potri.001G166800.v4.1	545.019	1692.66	1.63509	3.3e-06	NoSignifi
Potri.004G103300.v4.1	74.016	21.8041	-1.75725	4.53e-06	NoSignifi
Potri.003G019100.v4.1	419.76	119.548	-1.81292	2.3e-05	NoSignifi
Potri.005G120700.v4.1	1289.78	503.236	-1.35816	2.54e-05	NoSignifi
Potri.009G027300.v4.1	3904.15	11395.9	1.54537	2.91e-05	NoSignifi
Potri.015G028300.v4.1	2697.84	1809.18	-0.576248	3.92e-05	NoSignifi
Potri.001G345300.v4.1	26490.8	10563.8	-1.32638	3.98e-05	NoSignifi
Potri.016G061100.v4.1	875.374	359.701	-1.28255	4.17e-05	NoSignifi
Potri.002G094200.v4.1	2153.59	4477.26	1.056	6.58e-05	NoSignifi
Potri.019G024200.v4.1	2694.8	1735.91	-0.634299	8.92e-05	NoSignifi
Potri.005G216200.v4.1	400.596	647.97	0.693058	9.19e-05	NoSignifi
Potri.001G058600.v4.1	255.671	133.769	-0.935492	0.000181605	NoSignifi
Potri.017G078800.v4.1	1061.12	714.227	-0.571713	0.000209616	NoSignifi
Potri.003G180400.v4.1	116.927	38.0608	-1.61753	0.000214429	NoSignifi
Potri.003G182000.v4.1	58.8454	17.1909	-1.76999	0.00022409	NoSignifi
Potri.002G232600.v4.1	1819.36	1239.29	-0.553923	0.000248409	NoSignifi
Potri.004G236000.v4.1	730.599	1293.73	0.824517	0.000260539	NoSignifi
Potri.004G079900.v4.1	4168.16	5389	0.370533	0.000319347	NoSignifi
Potri.003G200080.v4.1	62.1498	169.054	1.44688	0.000379801	NoSignifi
Potri.008G029500.v4.1	99.9362	204.349	1.03209	0.000387848	NoSignifi
Potri.018G146300.v4.1	208.11	106.578	-0.96544	0.000492615	NoSignifi
Potri.013G157500.v4.1	46.2645	14.453	-1.68203	0.000547561	NoSignifi
Potri.002G253600.v4.1	3430.69	2102.72	-0.706246	0.000569021	NoSignifi
Potri.002G209900.v4.1	733.226	1249.37	0.768966	0.000638712	NoSignifi
Potri.011G006800.v4.1	1540.06	921.089	-0.742125	0.000723402	NoSignifi
Potri.006G052700.v4.1	158.476	342.399	1.11001	0.000748302	NoSignifi
Potri.002G250100.v4.1	89.7285	28.7324	-1.64203	0.000756569	NoSignifi
Potri.001G392801.v4.1	544.62	393.675	-0.46778	0.000950624	NoSignifi
Potri.001G229000.v4.1	451.754	841.408	0.897263	0.00123321	NoSignifi
Potri.015G143700.v4.1	995.417	609.082	-0.709167	0.00148897	NoSignifi
Potri.002G251400.v4.1	76.5354	147.014	0.939683	0.00162583	NoSignifi
Potri.014G017600.v4.1	131.576	33.8903	-1.96116	0.00181	NoSignifi
Potri.007G108500.v4.1	236.141	87.2273	-1.43736	0.00185628	NoSignifi
Potri.019G021200.v4.1	336.637	572.492	0.765636	0.00186561	NoSignifi
Potri.016G085800.v4.1	1293.04	766.498	-0.754089	0.00196223	NoSignifi
Potri.005G083100.v4.1	729.199	1084.99	0.573246	0.00203463	NoSignifi
Potri.004G189700.v4.1	1481.37	1123.21	-0.399202	0.00203708	NoSignifi
Potri.003G215400.v4.1	125.678	49.8988	-1.32745	0.00219702	NoSignifi
Potri.002G216100.v4.1	1085	598.861	-0.858018	0.00227668	NoSignifi
Potri.005G085700.v4.1	33.6624	12.7924	-1.39268	0.00241481	NoSignifi
Potri.015G105100.v4.1	2889.47	4548.14	0.654362	0.00243023	NoSignifi
Potri.008G104300.v4.1	260.211	105.115	-1.30653	0.002486	NoSignifi
Potri.009G058500.v4.1	63.9977	21.429	-1.5765	0.00263119	NoSignifi
Potri.015G061800.v4.1	1597.31	924.762	-0.788803	0.0026811	NoSignifi
Potri.008G035200.v4.1	796.178	1122.55	0.495127	0.00274173	NoSignifi
Potri.017G116200.v4.1	55.4673	17.8717	-1.63918	0.00309685	NoSignifi
Potri.007G007600.v4.1	183.562	100.759	-0.865599	0.00311605	NoSignifi
Potri.005G191400.v4.1	2256.84	3339.99	0.565343	0.00318533	NoSignifi
Potri.004G029400.v4.1	168.629	76.8081	-1.13225	0.00319457	NoSignifi
Potri.012G001400.v4.1	17.9199	54.2929	1.59848	0.00321422	NoSignifi
Potri.011G059101.v4.1	113.355	66.1125	-0.77475	0.00351156	NoSignifi
Potri.006G174900.v4.1	581.268	389.352	-0.578356	0.00356183	NoSignifi
Potri.003G172500.v4.1	839.354	1210.98	0.529212	0.00359744	NoSignifi
Potri.005G130900.v4.1	602.812	1999.96	1.73005	0.00366316	NoSignifi
Potri.019G010600.v4.1	41.0952	136.273	1.72435	0.00394986	NoSignifi
Potri.014G038000.v4.1	61.494	160.196	1.38152	0.00418128	NoSignifi
Potri.001G241300.v4.1	515.884	203.539	-1.34201	0.00418164	NoSignifi
Potri.012G021900.v4.1	75.169	39.7755	-0.921622	0.00454807	NoSignifi
Potri.015G068900.v4.1	2852.14	2050.8	-0.475968	0.00487437	NoSignifi
Potri.001G000900.v4.1	4997.94	3263.68	-0.614965	0.00584136	NoSignifi
Potri.010G005000.v4.1	63.5105	107.06	0.756308	0.00658627	NoSignifi
Potri.003G009300.v4.1	68.9927	113.937	0.723374	0.00663655	NoSignifi
Potri.015G093100.v4.1	53.7673	14.7757	-1.85608	0.0070767	NoSignifi
Potri.017G035300.v4.1	454.916	643.764	0.500559	0.0072598	NoSignifi
Potri.006G139500.v4.1	10449.8	6138.1	-0.767694	0.00766241	NoSignifi
Potri.012G064500.v4.1	573.126	409.495	-0.485943	0.00783695	NoSignifi
Potri.003G156301.v4.1	800.203	1053.19	0.396788	0.00801336	NoSignifi
Potri.003G185175.v4.1	157.938	73.6215	-1.09951	0.00811784	NoSignifi
Potri.001G358300.v4.1	3210.67	2061.28	-0.639604	0.00824979	NoSignifi
Potri.007G135500.v4.1	3065.34	4276.62	0.480326	0.00929632	NoSignifi
Potri.008G097200.v4.1	1933.44	4446.53	1.20147	0.00951473	NoSignifi
Potri.004G096000.v4.1	1038.97	2278.13	1.13257	0.00990369	NoSignifi
Potri.013G018800.v4.1	1758.35	1122.14	-0.648179	0.0128313	NoSignifi
Potri.018G020900.v4.1	1938.04	2649.96	0.451556	0.0130502	NoSignifi
Potri.002G125400.v4.1	559.76	791.184	0.498912	0.0130642	NoSignifi
Potri.006G026600.v4.1	163.084	70.7879	-1.20215	0.0145942	NoSignifi
Potri.004G164000.v4.1	107.445	174.991	0.705659	0.0148	NoSignifi
Potri.001G002000.v4.1	6590.56	12891.7	0.967986	0.0152694	NoSignifi
Potri.004G207600.v4.1	315.197	141.076	-1.15993	0.0152892	NoSignifi
Potri.013G159500.v4.1	3.48325	12.5822	1.85225	0.015944	NoSignifi
Potri.008G106400.v4.1	390.866	125.521	-1.63875	0.0163513	NoSignifi
Potri.009G119800.v4.1	398.065	208.544	-0.933246	0.0167737	NoSignifi
Potri.011G010500.v4.1	1096.97	555.097	-0.982254	0.0173615	NoSignifi
Potri.001G070700.v4.1	5.16788	16.4582	1.66161	0.0180481	NoSignifi
Potri.012G005500.v4.1	470.545	332.081	-0.502728	0.0181875	NoSignifi
Potri.006G054100.v4.1	696.092	1027.5	0.561996	0.0184923	NoSignifi
Potri.005G075600.v4.1	626.737	395.554	-0.664439	0.0187188	NoSignifi
Potri.002G208251.v4.1	26.8228	7.69362	-1.78999	0.0190865	NoSignifi
Potri.014G191100.v4.1	2598.29	1899.43	-0.452089	0.0193291	NoSignifi
Potri.013G028200.v4.1	1512.28	2013.44	0.412582	0.0196975	NoSignifi
Potri.011G103700.v4.1	2011.34	1166.29	-0.786398	0.0197259	NoSignifi
Potri.011G004000.v4.1	266.112	110.827	-1.26142	0.0202662	NoSignifi
Potri.017G069100.v4.1	761.153	1047.48	0.460894	0.0208157	NoSignifi
Potri.010G201100.v4.1	1430.84	1966.49	0.458785	0.0229436	NoSignifi
Potri.014G038300.v4.1	582.461	271.175	-1.10368	0.0234162	NoSignifi
Potri.001G232900.v4.1	115.944	248.09	1.0955	0.0257333	NoSignifi
Potri.002G249600.v4.1	1241.13	2408.29	0.95622	0.0259949	NoSignifi
Potri.008G103000.v4.1	845.516	1119.27	0.404967	0.0264425	NoSignifi
Potri.008G040000.v4.1	19.4362	39.2073	1.01498	0.0276312	NoSignifi
Potri.009G040500.v4.1	1697.85	2234.7	0.396163	0.0277547	NoSignifi
Potri.014G156100.v4.1	81.0558	32.7536	-1.30618	0.027892	NoSignifi
Potri.013G067300.v4.1	7991.92	4599.9	-0.796995	0.0284822	NoSignifi
Potri.017G073200.v4.1	682.368	865.853	0.343226	0.0291371	NoSignifi
Potri.010G146100.v4.1	310.821	220.558	-0.493927	0.0301754	NoSignifi
Potri.004G066700.v4.1	315.302	435.32	0.463966	0.0303367	NoSignifi
Potri.003G202500.v4.1	2695.33	3697.23	0.456025	0.0313728	NoSignifi
Potri.010G101200.v4.1	131.847	85.6667	-0.621785	0.0335824	NoSignifi
Potri.003G100000.v4.1	598.054	412.681	-0.534985	0.0349124	NoSignifi
Potri.004G134300.v4.1	52.4939	94.0667	0.838968	0.0351637	NoSignifi
Potri.014G035600.v4.1	458.346	580.761	0.341058	0.0364124	NoSignifi
Potri.003G046600.v4.1	319.886	427.284	0.417187	0.0367937	NoSignifi
Potri.003G180800.v4.1	495.226	386.462	-0.359164	0.0368197	NoSignifi
Potri.008G130700.v4.1	31.3481	56.8318	0.856617	0.0403572	NoSignifi
Potri.008G104100.v4.1	24.9211	42.4224	0.763801	0.0417085	NoSignifi
Potri.017G016200.v4.1	8365.85	10560.6	0.33608	0.0435877	NoSignifi
Potri.013G003400.v4.1	248.123	367.267	0.567375	0.0439175	NoSignifi
Potri.011G024000.v4.1	3526.93	2705.68	-0.382418	0.0440621	NoSignifi
Potri.003G183400.v4.1	480.091	378.975	-0.34017	0.0456718	NoSignifi
Potri.003G099900.v4.1	230.787	175.068	-0.39707	0.0462715	NoSignifi
Potri.011G005601.v4.1	35.4822	57.8053	0.699311	0.0484848	NoSignifi
Potri.010G137200.v4.1	291.642	155.245	-0.910398	0.0493208	NoSignifi
Potri.010G086700.v4.1	652.475	907.375	0.475556	0.0504439	NoSignifi
Potri.012G055800.v4.1	1186.31	806.423	-0.557448	0.0521615	NoSignifi
Potri.011G111400.v4.1	2940.06	2434.95	-0.272	0.0533006	NoSignifi
Potri.001G156500.v4.1	416.464	271.76	-0.616403	0.054232	NoSignifi
Potri.015G129000.v4.1	344.724	464.831	0.429902	0.0551657	NoSignifi
Potri.015G071200.v4.1	922.017	1169.56	0.343406	0.0573065	NoSignifi
Potri.005G097400.v4.1	379.521	518.762	0.450542	0.0583594	NoSignifi
Potri.010G250100.v4.1	191.504	272.773	0.512034	0.0601012	NoSignifi
Potri.001G027100.v4.1	9648.22	2267.32	-2.08924	0.0615028	NoSignifi
Potri.001G168600.v4.1	49.8578	90.261	0.856774	0.0617766	NoSignifi
Potri.005G076200.v4.1	2938.22	2230.55	-0.39776	0.0643205	NoSignifi
Potri.004G048201.v4.1	266.867	119.559	-1.15994	0.0690221	NoSignifi
Potri.015G041700.v4.1	462.199	376.954	-0.294817	0.0707169	NoSignifi
Potri.004G194800.v4.1	292.869	215.5	-0.441496	0.0722845	NoSignifi
Potri.006G082500.v4.1	525.662	333.172	-0.658359	0.0744898	NoSignifi
Potri.010G163200.v4.1	4398.73	3042.69	-0.531792	0.0765638	NoSignifi
Potri.011G037000.v4.1	241.674	339.195	0.487499	0.0777196	NoSignifi
Potri.004G123300.v4.1	1147	950.64	-0.271324	0.0786479	NoSignifi
Potri.003G053301.v4.1	257.983	322.89	0.32498	0.0790176	NoSignifi
Potri.014G163100.v4.1	57.7168	35.921	-0.682395	0.0791415	NoSignifi
Potri.007G011600.v4.1	48.2364	18.3404	-1.40099	0.0803233	NoSignifi
Potri.011G031900.v4.1	712.249	853.249	0.260905	0.082619	NoSignifi
Potri.016G064800.v4.1	806.822	556.121	-0.537138	0.082956	NoSignifi
Potri.002G125300.v4.1	1.74708	7.9841	2.19741	0.0834064	NoSignifi
Potri.015G059301.v4.1	4.22035	0.656865	-2.71906	0.0844478	NoSignifi
Potri.011G019500.v4.1	2.79572	0	-4.00689	0.085214	NoSignifi
Potri.010G121600.v4.1	25.1424	11.8602	-1.07771	0.0885311	NoSignifi
Potri.008G085400.v4.1	960.535	1184.04	0.301686	0.0903257	NoSignifi
Potri.002G068600.v4.1	461.261	696.612	0.595192	0.0904746	NoSignifi
Potri.001G114500.v4.1	384.399	243.404	-0.660639	0.0912091	NoSignifi
Potri.012G040200.v4.1	111.786	64.6437	-0.792767	0.0924457	NoSignifi
Potri.001G348800.v4.1	375.41	530.116	0.497772	0.094516	NoSignifi
Potri.012G102500.v4.1	599.238	767.707	0.356787	0.0976006	NoSignifi
Potri.003G183501.v4.1	100.677	67.6328	-0.575587	0.0993693	NoSignifi
Potri.004G005900.v4.1	1993.33	1240.75	-0.684073	0.102804	NoSignifi
Potri.001G161700.v4.1	2318	1958.13	-0.243579	0.10526	NoSignifi
Potri.012G119500.v4.1	25.6223	47.7076	0.891939	0.107335	NoSignifi
Potri.011G036100.v4.1	7.49393	19.131	1.34663	0.108488	NoSignifi
Potri.002G252900.v4.1	495.104	401.499	-0.301567	0.110566	NoSignifi
Potri.004G101250.v4.1	1998.03	1714.05	-0.221358	0.111251	NoSignifi
Potri.015G105900.v4.1	25.0297	37.5275	0.581561	0.113471	NoSignifi
Potri.004G131100.v4.1	3.69368	0	-4.41215	0.118193	NoSignifi
Potri.010G130700.v4.1	133.611	178.977	0.424168	0.118366	NoSignifi
Potri.009G064200.v4.1	8.11428	2.25672	-1.856	0.12008	NoSignifi
Potri.008G215100.v4.1	530.169	430.096	-0.302244	0.120484	NoSignifi
Potri.011G040800.v4.1	26.9817	16.9764	-0.671711	0.126534	NoSignifi
Potri.018G051500.v4.1	329.971	394.097	0.25662	0.130525	NoSignifi
Potri.004G058200.v4.1	9.16293	2.68387	-1.7987	0.130741	NoSignifi
Potri.015G041400.v4.1	9.9828	2.03338	-2.2645	0.134554	NoSignifi
Potri.002G237950.v4.1	942.871	1066.65	0.178012	0.135533	NoSignifi
Potri.010G038400.v4.1	3835.61	2641.2	-0.538331	0.136041	NoSignifi
Potri.005G144400.v4.1	276.813	324.454	0.229872	0.138521	NoSignifi
Potri.010G148000.v4.1	217.496	272.834	0.328066	0.144864	NoSignifi
Potri.011G023100.v4.1	1307.64	1463.28	0.162468	0.149434	NoSignifi
Potri.010G039000.v4.1	127.4	172.371	0.438542	0.149635	NoSignifi
Potri.013G119700.v4.1	633.247	779.157	0.298709	0.149931	NoSignifi
Potri.005G115800.v4.1	162.794	93.2614	-0.805274	0.150567	NoSignifi
Potri.006G259300.v4.1	49.31	30.298	-0.703269	0.152244	NoSignifi
Potri.001G450600.v4.1	342.936	260.077	-0.400136	0.153457	NoSignifi
Potri.008G076100.v4.1	266.589	204.326	-0.383523	0.154274	NoSignifi
Potri.013G006700.v4.1	31.9364	48.6552	0.601084	0.155899	NoSignifi
Potri.016G143100.v4.1	94.3868	69.1715	-0.447383	0.158174	NoSignifi
Potri.015G103300.v4.1	366.113	301.278	-0.28107	0.161091	NoSignifi
Potri.016G047600.v4.1	308.985	363.846	0.234549	0.164649	NoSignifi
Potri.001G376800.v4.1	186.91	247.174	0.402266	0.16792	NoSignifi
Potri.002G107902.v4.1	2160.94	1854.91	-0.220415	0.171483	NoSignifi
Potri.006G091500.v4.1	109.808	136.188	0.311089	0.17292	NoSignifi
Potri.011G007200.v4.1	836.007	578.267	-0.532114	0.174386	NoSignifi
Potri.008G104700.v4.1	10.9581	3.26048	-1.76603	0.17631	NoSignifi
Potri.014G075200.v4.1	0.355661	4.05838	3.42876	0.177017	NoSignifi
Potri.016G034000.v4.1	61.4139	35.3579	-0.800334	0.18427	NoSignifi
Potri.002G221000.v4.1	514.517	583.551	0.181389	0.185622	NoSignifi
Potri.007G067700.v4.1	944.945	1102.39	0.221795	0.187225	NoSignifi
Potri.004G161800.v4.1	906.202	1071.58	0.242088	0.187655	NoSignifi
Potri.015G026200.v4.1	163.745	127.994	-0.355049	0.188241	NoSignifi
Potri.003G060000.v4.1	21.3808	11.7433	-0.863007	0.19686	NoSignifi
Potri.011G148400.v4.1	864.994	1247.71	0.5282	0.199551	NoSignifi
Potri.013G003100.v4.1	56.7951	82.0477	0.533726	0.200265	NoSignifi
Potri.007G050000.v4.1	3.45202	0.685072	-2.39173	0.203589	NoSignifi
Potri.006G175161.v4.1	559.456	658.847	0.23502	0.204079	NoSignifi
Potri.011G165600.v4.1	20.7476	31.7349	0.619122	0.206521	NoSignifi
Potri.002G251200.v4.1	491.772	610.788	0.312261	0.209562	NoSignifi
Potri.007G063700.v4.1	188.335	241.432	0.358389	0.214121	NoSignifi
Potri.006G169700.v4.1	3668.73	2719.81	-0.431912	0.215832	NoSignifi
Potri.002G030200.v4.1	129.449	160.277	0.310609	0.215909	NoSignifi
Potri.010G034900.v4.1	1054.01	924.979	-0.187917	0.217816	NoSignifi
Potri.001G025200.v4.1	0.324434	3.39715	3.17086	0.21866	NoSignifi
Potri.017G019300.v4.1	59.4006	87.0227	0.554635	0.220253	NoSignifi
Potri.009G072500.v4.1	182.064	214.8	0.240442	0.230731	NoSignifi
Potri.006G132450.v4.1	331.213	258.253	-0.357959	0.231056	NoSignifi
Potri.001G388600.v4.1	14.5534	5.71465	-1.36812	0.232791	NoSignifi
Potri.015G104100.v4.1	182.679	150.773	-0.274631	0.239603	NoSignifi
Potri.001G043700.v4.1	137.031	186.249	0.442395	0.240205	NoSignifi
Potri.015G035400.v4.1	13.6887	3.49019	-1.97665	0.241939	NoSignifi
Potri.006G199200.v4.1	69.9734	54.5539	-0.359177	0.243785	NoSignifi
Potri.006G216300.v4.1	16.7518	7.67182	-1.11711	0.250003	NoSignifi
Potri.010G039466.v4.1	212.329	244.467	0.203886	0.255095	NoSignifi
Potri.008G101800.v4.1	153.056	188.835	0.305282	0.255339	NoSignifi
Potri.011G165500.v4.1	23.5758	15.3852	-0.617089	0.265532	NoSignifi
Potri.002G194100.v4.1	112.466	137.792	0.292448	0.266402	NoSignifi
Potri.001G212000.v4.1	477.916	544.997	0.188539	0.269695	NoSignifi
Potri.001G062700.v4.1	319.223	408.206	0.354144	0.270265	NoSignifi
Potri.010G165800.v4.1	0.368548	1.86649	2.31817	0.270468	NoSignifi
Potri.002G024400.v4.1	6960.44	5796.67	-0.263929	0.275445	NoSignifi
Potri.003G215700.v4.1	1457.97	1305.35	-0.159942	0.276404	NoSignifi
Potri.015G058900.v4.1	787.614	712.433	-0.144331	0.284944	NoSignifi
Potri.005G051100.v4.1	75.5152	93.1822	0.306389	0.287037	NoSignifi
Potri.015G071700.v4.1	216.408	172.315	-0.327392	0.29066	NoSignifi
Potri.006G117300.v4.1	645.369	749.185	0.21582	0.293182	NoSignifi
Potri.014G141800.v4.1	1912.47	1752.44	-0.126238	0.302796	NoSignifi
Potri.002G244500.v4.1	4.52446	8.63896	0.92666	0.307016	NoSignifi
Potri.006G154000.v4.1	2489.47	2266.31	-0.135627	0.312313	NoSignifi
Potri.004G070000.v4.1	52.6847	34.0011	-0.635805	0.314254	NoSignifi
Potri.011G019750.v4.1	2.71493	5.75999	1.06338	0.31436	NoSignifi
Potri.008G093000.v4.1	15.3408	22.9465	0.584236	0.317886	NoSignifi
Potri.005G032600.v4.1	10.6344	18.9335	0.832537	0.318093	NoSignifi
Potri.014G139500.v4.1	2658.03	3011.89	0.180128	0.321335	NoSignifi
Potri.008G041300.v4.1	1058.44	797.305	-0.40883	0.323053	NoSignifi
Potri.002G024966.v4.1	94.5271	124.549	0.400128	0.326143	NoSignifi
Potri.015G039700.v4.1	252.3	328.663	0.382082	0.329158	NoSignifi
Potri.001G447700.v4.1	1.75451	0	-3.33418	0.330648	NoSignifi
Potri.017G071600.v4.1	34.6229	45.8364	0.406371	0.333096	NoSignifi
Potri.001G451600.v4.1	0	1.79059	3.22194	0.344726	NoSignifi
Potri.019G080900.v4.1	327.892	291.947	-0.168122	0.34701	NoSignifi
Potri.017G035401.v4.1	31.2103	41.3169	0.398288	0.354943	NoSignifi
Potri.002G057700.v4.1	3094.98	2465.5	-0.328169	0.3551	NoSignifi
Potri.004G161700.v4.1	1280.58	1470.69	0.199551	0.35683	NoSignifi
Potri.004G138600.v4.1	440.344	386.018	-0.190782	0.357789	NoSignifi
Potri.014G169400.v4.1	2544.64	2343.11	-0.119086	0.360302	NoSignifi
Potri.007G065500.v4.1	1237.99	1375.38	0.151993	0.362876	NoSignifi
Potri.015G055400.v4.1	679.273	794.542	0.225821	0.363096	NoSignifi
Potri.011G114000.v4.1	12.7942	8.0862	-0.675676	0.375114	NoSignifi
Potri.003G183600.v4.1	625.055	689.412	0.140797	0.375232	NoSignifi
Potri.008G223987.v4.1	3.1147	5.83789	0.910677	0.376243	NoSignifi
Potri.004G071000.v4.1	1846.8	1374.75	-0.42601	0.377334	NoSignifi
Potri.003G178000.v4.1	2973.9	2666.18	-0.157806	0.379366	NoSignifi
Potri.004G015800.v4.1	102.986	79.2791	-0.374842	0.383401	NoSignifi
Potri.008G107100.v4.1	327.545	364.137	0.153934	0.384676	NoSignifi
Potri.006G219100.v4.1	3.51448	6.07868	0.788203	0.385887	NoSignifi
Potri.014G194500.v4.1	109.396	92.4949	-0.243048	0.389802	NoSignifi
Potri.004G052400.v4.1	1.6534	0.342536	-2.29792	0.397865	NoSignifi
Potri.007G069500.v4.1	1763	1481.7	-0.250872	0.398023	NoSignifi
Potri.013G099700.v4.1	544.033	501.449	-0.117474	0.404543	NoSignifi
Potri.009G015400.v4.1	17176.3	18334.2	0.0941218	0.413075	NoSignifi
Potri.014G119600.v4.1	541.274	490.542	-0.141617	0.418378	NoSignifi
Potri.007G139300.v4.1	1234.84	1414.78	0.196207	0.420776	NoSignifi
Potri.006G152600.v4.1	1.00453	2.60797	1.33986	0.425554	NoSignifi
Potri.011G004200.v4.1	43.9669	30.291	-0.535225	0.428963	NoSignifi
Potri.010G006700.v4.1	2.21129	0.342536	-2.70218	0.429599	NoSignifi
Potri.010G192600.v4.1	969.735	1059.85	0.127815	0.430596	NoSignifi
Potri.014G157800.v4.1	14.7177	19.5625	0.417404	0.431233	NoSignifi
Potri.007G020732.v4.1	90.8119	76.1331	-0.257869	0.438249	NoSignifi
Potri.014G001700.v4.1	7.43419	10.9302	0.565554	0.440868	NoSignifi
Potri.006G109900.v4.1	4169.56	3254.02	-0.357709	0.441497	NoSignifi
Potri.003G026510.v4.1	609.432	569.44	-0.0984801	0.445305	NoSignifi
Potri.002G231700.v4.1	275.603	315.334	0.194558	0.448375	NoSignifi
Potri.006G122100.v4.1	55.1085	63.4266	0.203625	0.452122	NoSignifi
Potri.019G018100.v4.1	5291.69	5796.66	0.131546	0.454872	NoSignifi
Potri.003G126500.v4.1	104.39	126.826	0.284355	0.456181	NoSignifi
Potri.005G087200.v4.1	88.3203	154.13	0.802293	0.463571	NoSignifi
Potri.006G021000.v4.1	6.19075	3.86529	-0.69713	0.463881	NoSignifi
Potri.011G000900.v4.1	1288.5	1218.43	-0.0805728	0.476012	NoSignifi
Potri.012G116170.v4.1	1.32896	0.342536	-1.98326	0.478076	NoSignifi
Potri.003G114000.v4.1	4246.65	4469.04	0.0736612	0.479017	NoSignifi
Potri.010G070750.v4.1	729.331	802.008	0.13617	0.480097	NoSignifi
Potri.018G149500.v4.1	742.898	695.426	-0.0955679	0.482426	NoSignifi
Potri.017G069300.v4.1	255.971	282.395	0.142741	0.486404	NoSignifi
Potri.015G106300.v4.1	3.38214	5.77071	0.766859	0.486816	NoSignifi
Potri.006G150000.v4.1	1059.14	1136.59	0.102153	0.492888	NoSignifi
Potri.008G105100.v4.1	397.055	446.496	0.170344	0.49646	NoSignifi
Potri.014G041800.v4.1	0	1.18578	2.6287	0.498694	NoSignifi
Potri.010G090100.v4.1	3667.42	3413.05	-0.103902	0.502786	NoSignifi
Potri.010G054300.v4.1	1817.02	1684.41	-0.109725	0.503056	NoSignifi
Potri.001G229900.v4.1	1.10565	0	-2.66201	0.504712	NoSignifi
Potri.009G076500.v4.1	263.945	327.907	0.313987	0.509339	NoSignifi
Potri.001G144500.v4.1	184.709	205.565	0.152638	0.517827	NoSignifi
Potri.011G021900.v4.1	1.03576	0	-2.57602	0.519106	NoSignifi
Potri.002G108000.v4.1	14613.4	15755.1	0.108558	0.521272	NoSignifi
Potri.013G053100.v4.1	4.9629	7.19291	0.545746	0.529915	NoSignifi
Potri.005G081500.v4.1	646.155	697.196	0.11011	0.532083	NoSignifi
Potri.003G065701.v4.1	0.973302	0	-2.49493	0.532865	NoSignifi
Potri.003G204900.v4.1	563.059	605.014	0.103958	0.546034	NoSignifi
Potri.010G239400.v4.1	43.2822	51.0765	0.235167	0.546123	NoSignifi
Potri.005G201200.v4.1	0	1.02761	2.40507	0.546489	NoSignifi
Potri.017G058200.v4.1	622.108	671.682	0.110297	0.552554	NoSignifi
Potri.004G142900.v4.1	0	0.999401	2.36819	0.552866	NoSignifi
Potri.004G191101.v4.1	0	0.999401	2.36819	0.552866	NoSignifi
Potri.004G113000.v4.1	1.6534	3.08047	0.876784	0.552927	NoSignifi
Potri.006G091600.v4.1	0.324434	1.18578	1.67317	0.558518	NoSignifi
Potri.015G076300.v4.1	0.324434	1.18578	1.67317	0.558518	NoSignifi
Potri.015G103000.v4.1	22.4728	27.2628	0.282231	0.568015	NoSignifi
Potri.016G052500.v4.1	0	0.919141	2.25833	0.572065	NoSignifi
Potri.003G178800.v4.1	365.058	341.92	-0.0930218	0.576629	NoSignifi
Potri.003G180000.v4.1	183.351	198.316	0.115109	0.57695	NoSignifi
Potri.001G268400.v4.1	0	0.895294	2.22395	0.578133	NoSignifi
Potri.019G129400.v4.1	3.68823	5.62767	0.594185	0.581819	NoSignifi
Potri.002G026800.v4.1	998.912	935.571	-0.0947452	0.583051	NoSignifi
Potri.008G106900.v4.1	99.8484	111.249	0.158105	0.586399	NoSignifi
Potri.010G040600.v4.1	380.138	410.031	0.108626	0.595304	NoSignifi
Potri.001G205400.v4.1	259.962	306.69	0.237413	0.598214	NoSignifi
Potri.001G079800.v4.1	153.571	182.428	0.25003	0.600283	NoSignifi
Potri.015G058500.v4.1	289.139	317.847	0.138317	0.602256	NoSignifi
Potri.006G036300.v4.1	5741.23	6341.76	0.143444	0.609565	NoSignifi
Potri.001G355200.v4.1	1.06153	1.94675	0.872395	0.610493	NoSignifi
Potri.019G095200.v4.1	0.72421	0	-2.05177	0.611003	NoSignifi
Potri.001G326100.v4.1	0.711323	0	-2.02924	0.615097	NoSignifi
Potri.014G030200.v4.1	0.368548	1.37014	1.85949	0.615216	NoSignifi
Potri.014G143600.v4.1	1077.89	1138.91	0.0798309	0.620349	NoSignifi
Potri.007G020500.v4.1	222.372	197.784	-0.169263	0.631083	NoSignifi
Potri.006G083850.v4.1	0.648868	0	-1.91426	0.636149	NoSignifi
Potri.004G171000.v4.1	10.9405	8.63224	-0.340803	0.636541	NoSignifi
Potri.012G067600.v4.1	0.368548	1.25732	1.74524	0.640714	NoSignifi
Potri.001G401100.v4.1	3.54571	5.71434	0.691625	0.650167	NoSignifi
Potri.004G133600.v4.1	789.201	826.466	0.0660687	0.651279	NoSignifi
Potri.001G291700.v4.1	0	0.685072	1.81551	0.652258	NoSignifi
Potri.011G129000.v4.1	0	0.685072	1.81551	0.652258	NoSignifi
Potri.003G181600.v4.1	0.324434	0.923501	1.30444	0.661078	NoSignifi
Potri.008G086000.v4.1	2.49706	3.52712	0.502744	0.663451	NoSignifi
Potri.002G249500.v4.1	326.61	296.537	-0.137862	0.664426	NoSignifi
Potri.009G028800.v4.1	11.5167	14.2468	0.316547	0.668937	NoSignifi
Potri.002G252700.v4.1	204.751	224.663	0.1327	0.676558	NoSignifi
Potri.011G022000.v4.1	0	0.604812	1.65863	0.681596	NoSignifi
Potri.003G050100.v4.1	12894.2	12227.1	-0.076702	0.681624	NoSignifi
Potri.010G129000.v4.1	0	0.580965	1.60873	0.691014	NoSignifi
Potri.015G082500.v4.1	653.662	682.922	0.0640183	0.694882	NoSignifi
Potri.016G137600.v4.1	0.973302	0.290482	-1.53349	0.696965	NoSignifi
Potri.002G251800.v4.1	47.3728	53.9575	0.192563	0.699425	NoSignifi
Potri.009G050200.v4.1	958.18	992.855	0.0515931	0.701647	NoSignifi
Potri.004G025800.v4.1	1.9466	3.60502	0.879948	0.703057	NoSignifi
Potri.015G071400.v4.1	273.214	294.991	0.112267	0.707018	NoSignifi
Potri.012G006100.v4.1	650.923	624.215	-0.061335	0.707282	NoSignifi
Potri.004G120800.v4.1	128.934	121.388	-0.0848583	0.708957	NoSignifi
Potri.002G216000.v4.1	121.241	140.506	0.212298	0.711901	NoSignifi
Potri.014G170500.v4.1	286.274	269.944	-0.0828792	0.717133	NoSignifi
Potri.001G420000.v4.1	3.55116	2.41925	-0.535696	0.722485	NoSignifi
Potri.010G087400.v4.1	602.879	631.188	0.0657318	0.724621	NoSignifi
Potri.011G089300.v4.1	1205.76	1262.16	0.0656799	0.728072	NoSignifi
Potri.001G031400.v4.1	931.38	974.159	0.0652717	0.732364	NoSignifi
Potri.015G056000.v4.1	3079.24	2937.8	-0.0680131	0.737211	NoSignifi
Potri.007G093850.v4.1	2.35927	3.61174	0.599017	0.745792	NoSignifi
Potri.013G003200.v4.1	846.4	901.302	0.0911735	0.748414	NoSignifi
Potri.005G122500.v4.1	10.7593	13.1678	0.281408	0.748787	NoSignifi
Potri.016G020400.v4.1	1.77831	0.999401	-0.843037	0.75239	NoSignifi
Potri.011G023000.v4.1	433.868	418.866	-0.0509178	0.753037	NoSignifi
Potri.010G025500.v4.1	84.3617	120.132	0.509605	0.761164	NoSignifi
Potri.008G122100.v4.1	4.57403	5.79255	0.337361	0.770257	NoSignifi
Potri.011G009900.v4.1	1666.19	1736.28	0.0591556	0.775244	NoSignifi
Potri.011G032900.v4.1	605.051	625.956	0.0485346	0.775455	NoSignifi
Potri.007G141900.v4.1	10.4939	9.04431	-0.222271	0.776237	NoSignifi
Potri.014G036700.v4.1	7.7036	9.34317	0.288198	0.778248	NoSignifi
Potri.008G105000.v4.1	155.596	149.333	-0.0570954	0.780992	NoSignifi
Potri.013G062700.v4.1	0.737097	0.342536	-1.11226	0.782652	NoSignifi
Potri.001G356900.v4.1	10363	10697.1	0.0457993	0.782898	NoSignifi
Potri.002G252400.v4.1	0.368548	0	-1.10956	0.785685	NoSignifi
Potri.003G213300.v4.1	0.368548	0	-1.10956	0.785685	NoSignifi
Potri.008G203300.v4.1	0.368548	0	-1.10956	0.785685	NoSignifi
Potri.011G008548.v4.1	0.355661	0	-1.10956	0.785685	NoSignifi
Potri.011G021400.v4.1	0.368548	0	-1.10956	0.785685	NoSignifi
Potri.012G088400.v4.1	0.368548	0	-1.10956	0.785685	NoSignifi
Potri.012G120768.v4.1	0.324434	0	-1.10956	0.785685	NoSignifi
Potri.015G103100.v4.1	6.72832	5.5887	-0.259167	0.794884	NoSignifi
Potri.010G078600.v4.1	159.034	151.871	-0.0682447	0.798843	NoSignifi
Potri.008G038200.v4.1	29682.4	31130.7	0.0687186	0.821715	NoSignifi
Potri.001G401300.v4.1	3956.26	3614.09	-0.130518	0.823155	NoSignifi
Potri.010G102900.v4.1	718.941	749.116	0.0596521	0.825042	NoSignifi
Potri.002G233800.v4.1	220.143	228.014	0.0499802	0.826468	NoSignifi
Potri.018G104900.v4.1	792.373	809.219	0.029705	0.839908	NoSignifi
Potri.002G006300.v4.1	270.611	262.252	-0.043672	0.840463	NoSignifi
Potri.003G055501.v4.1	0	0.290482	0.813997	0.841883	NoSignifi
Potri.004G017800.v4.1	0	0.342536	0.813997	0.841883	NoSignifi
Potri.005G235500.v4.1	0	0.290482	0.813997	0.841883	NoSignifi
Potri.008G013900.v4.1	0	0.314329	0.813997	0.841883	NoSignifi
Potri.009G057900.v4.1	0	0.314329	0.813997	0.841883	NoSignifi
Potri.011G016400.v4.1	0	0.342536	0.813997	0.841883	NoSignifi
Potri.013G093100.v4.1	0	0.342536	0.813997	0.841883	NoSignifi
Potri.016G018001.v4.1	0	0.314329	0.813997	0.841883	NoSignifi
Potri.017G066200.v4.1	0	0.314329	0.813997	0.841883	NoSignifi
Potri.018G056301.v4.1	0	0.314329	0.813997	0.841883	NoSignifi
Potri.011G042500.v4.1	420.297	409.366	-0.0386514	0.848456	NoSignifi
Potri.019G051300.v4.1	1298.14	1324.96	0.0290237	0.848978	NoSignifi
Potri.009G157500.v4.1	320.733	331.969	0.0489262	0.850069	NoSignifi
Potri.008G025700.v4.1	132.481	126.133	-0.0716602	0.852273	NoSignifi
Potri.013G000300.v4.1	1690.04	1661.36	-0.0247465	0.859298	NoSignifi
Potri.005G253800.v4.1	450.412	436.717	-0.0439798	0.862132	NoSignifi
Potri.018G141100.v4.1	788.931	762.345	-0.0496358	0.865371	NoSignifi
Potri.002G245600.v4.1	424.332	410.374	-0.0473852	0.867623	NoSignifi
Potri.006G069100.v4.1	144.827	150.869	0.0587354	0.870033	NoSignifi
Potri.013G112200.v4.1	30.9673	28.9752	-0.0896512	0.889544	NoSignifi
Potri.006G168400.v4.1	86.1165	83.094	-0.0555559	0.889988	NoSignifi
Potri.002G016100.v4.1	4.79933	4.44626	-0.124144	0.891181	NoSignifi
Potri.001G443025.v4.1	54.5463	58.409	0.101734	0.892982	NoSignifi
Potri.005G039100.v4.1	540.614	549.905	0.0254287	0.905687	NoSignifi
Potri.011G032700.v4.1	1404.57	1383.08	-0.0226843	0.911037	NoSignifi
Potri.011G004800.v4.1	159.381	161.99	0.021525	0.913603	NoSignifi
Potri.004G234500.v4.1	4.62558	4.1709	-0.14883	0.915262	NoSignifi
Potri.003G182100.v4.1	64.8489	66.173	0.0316007	0.917465	NoSignifi
Potri.014G154500.v4.1	2.03483	1.8188	-0.158169	0.9232	NoSignifi
Potri.005G074066.v4.1	470.87	459.802	-0.03438	0.924965	NoSignifi
Potri.004G080100.v4.1	307.074	303.773	-0.0159306	0.935193	NoSignifi
Potri.013G123401.v4.1	1.74708	1.55652	-0.16386	0.935232	NoSignifi
Potri.013G036000.v4.1	2.10274	1.9229	-0.134631	0.935782	NoSignifi
Potri.017G081500.v4.1	742.861	734.499	-0.0169583	0.937177	NoSignifi
Potri.004G119500.v4.1	276.937	273.767	-0.0166026	0.937942	NoSignifi
Potri.007G046700.v4.1	996.285	1012.63	0.0235973	0.939889	NoSignifi
Potri.017G032100.v4.1	26.9763	26.3239	-0.0327984	0.941775	NoSignifi
Potri.013G000200.v4.1	110.321	112.151	0.0223448	0.943725	NoSignifi
Potri.011G007100.v4.1	5311.11	5391.9	0.0217211	0.950827	NoSignifi
Potri.015G055500.v4.1	617.771	613.81	-0.00909321	0.951129	NoSignifi
Potri.003G180700.v4.1	173.566	175.136	0.0132224	0.959313	NoSignifi
Potri.019G130900.v4.1	570.341	574.327	0.00937598	0.959746	NoSignifi
Potri.006G016100.v4.1	201.673	200.419	-0.00947024	0.960726	NoSignifi
Potri.005G237500.v4.1	2179.97	2193.65	0.00885523	0.964453	NoSignifi
Potri.018G077983.v4.1	0.355661	0.314329	-0.147776	0.971111	NoSignifi
Potri.007G074201.v4.1	4.94456	4.99465	0.0242673	0.979371	NoSignifi
Potri.003G120500.v4.1	6.34886	6.20428	-0.02192	0.979506	NoSignifi
Potri.008G098600.v4.1	1423.05	1428.92	0.00586185	0.979597	NoSignifi
Potri.001G352800.v4.1	142.772	143.311	0.00433904	0.989428	NoSignifi
Potri.007G003800.v4.1	0.648868	0.685072	0.0476973	0.990259	NoSignifi
Potri.007G039901.v4.1	1.80408	1.79059	0.0150101	0.993743	NoSignifi
Potri.014G084200.v4.1	27.1445	26.9613	-0.00277222	0.995732	NoSignifi
Potri.001G252100.v4.1	453.836	104.962	-2.11106	2.37e-15	Down
Potri.009G107500.v4.1	205.432	0	-10.2072	1.53e-14	Down
Potri.017G020398.v4.1	104.974	18.7542	-2.4911	1.87e-09	Down
Potri.013G110300.v4.1	55.0569	2.63618	-4.42859	2.72e-09	Down
Potri.016G015500.v4.1	11990	2870.37	-2.06257	6.15e-08	Down
Potri.014G192701.v4.1	43.8814	5.10949	-3.07558	3.32e-05	Down
Potri.014G162000.v4.1	145.802	31.3582	-2.22372	3.36e-05	Down
Potri.011G031200.v4.1	120.42	22.3545	-2.42508	3.62e-05	Down
Potri.016G121900.v4.1	25.8299	4.18398	-2.63975	0.000232906	Down
Potri.019G117500.v4.1	139.713	26.8713	-2.38429	0.00210005	Down
Potri.011G023500.v4.1	13.2115	1.23783	-3.39694	0.00212178	Down
Potri.003G185401.v4.1	13.9669	1.94239	-2.8593	0.0130791	Down
Potri.010G007833.v4.1	13.3459	0	-6.26418	0.0174544	Down
Potri.003G219300.v4.1	35.1538	7.20163	-2.28751	0.0179671	Down
Potri.001G422000.v4.1	19.6853	4.17526	-2.24262	0.0179676	Down
Potri.013G039700.v4.1	9.16838	1.34194	-2.81561	0.0281899	Down
Potri.011G002700.v4.1	17.7508	3.96705	-2.14815	0.047679	Down
Potri.001G014200.v4.1	0	0
Potri.001G108600.v4.1	0	0
Potri.001G142900.v4.1	0	0
Potri.001G175900.v4.1	0	0
Potri.001G212200.v4.1	0	0
Potri.001G217050.v4.1	0	0
Potri.001G292000.v4.1	0	0
Potri.001G347200.v4.1	0	0
Potri.001G392050.v4.1	0	0
Potri.001G414677.v4.1	0	0
Potri.002G097132.v4.1	0	0
Potri.002G209602.v4.1	0	0
Potri.002G252050.v4.1	0	0
Potri.002G253100.v4.1	0	0
Potri.003G019900.v4.1	0	0
Potri.003G057700.v4.1	0	0
Potri.003G176700.v4.1	0	0
Potri.003G184300.v4.1	0	0
Potri.003G204450.v4.1	0	0
Potri.004G008000.v4.1	0	0
Potri.004G048000.v4.1	0	0
Potri.004G124200.v4.1	0	0
Potri.004G165500.v4.1	0	0
Potri.005G030100.v4.1	0	0
Potri.005G065300.v4.1	0	0
Potri.005G084400.v4.1	0	0
Potri.005G153600.v4.1	0	0
Potri.005G228550.v4.1	0	0
Potri.006G061300.v4.1	0	0
Potri.007G067000.v4.1	0	0
Potri.008G010000.v4.1	0	0
Potri.008G097800.v4.1	0	0
Potri.008G104600.v4.1	0	0
Potri.008G157400.v4.1	0	0
Potri.008G163100.v4.1	0	0
Potri.008G205550.v4.1	0	0
Potri.008G208100.v4.1	0	0
Potri.008G210650.v4.1	0	0
Potri.009G136501.v4.1	0	0
Potri.009G142600.v4.1	0	0
Potri.010G000301.v4.1	0	0
Potri.010G011200.v4.1	0	0
Potri.010G042400.v4.1	0	0
Potri.011G004300.v4.1	0	0
Potri.011G008740.v4.1	0	0
Potri.011G021332.v4.1	0	0
Potri.011G025100.v4.1	0	0
Potri.011G025300.v4.1	0	0
Potri.011G026100.v4.1	0	0
Potri.011G158100.v4.1	0	0
Potri.012G001900.v4.1	0	0
Potri.012G044150.v4.1	0	0
Potri.013G003301.v4.1	0	0
Potri.013G157250.v4.1	0	0
Potri.014G054900.v4.1	0	0
Potri.014G136532.v4.1	0	0
Potri.014G186733.v4.1	0	0
Potri.015G015275.v4.1	0	0
Potri.015G045300.v4.1	0	0
Potri.015G050601.v4.1	0	0
Potri.015G063300.v4.1	0	0
Potri.015G067700.v4.1	0	0
Potri.015G092000.v4.1	0	0
Potri.016G016200.v4.1	0	0
Potri.016G106100.v4.1	0	0
Potri.016G130950.v4.1	0	0
Potri.017G006500.v4.1	0	0
Potri.017G031450.v4.1	0	0
Potri.017G063966.v4.1	0	0
Potri.017G067900.v4.1	0	0
Potri.017G072950.v4.1	0	0
Potri.017G140700.v4.1	0	0
Potri.017G141700.v4.1	0	0
Potri.018G051400.v4.1	0	0
Potri.018G053400.v4.1	0	0
Potri.018G094400.v4.1	0	0
Potri.018G113901.v4.1	0	0
Potri.019G126700.v4.1	0	0

## Sheet: Table S10
Table S10. miRNA related to the candidate genes.
SiteID	Query	Transcript	TStart	TStop	TSlice	TrueTSlice	SliceType	MFEperfect	MFEsite	MFEratio	AllenScore	Paired	Unpaired	Structure	Sequence	DegradomeCategory	DegradomePval
Potri.012G001400:miR164a-Known-5p-mature:652	miR164a-Known-5p-mature	Potri.012G001400	639	661	652	652	10	-44.3	-39.5	0.891648	3	1-18,661-644;19-20,641-640	x-x,643-642[BULt];21-21,639-639[UP3]	.((..((((((((((((((((((&))))))))))))))))))--)).	GGCCUACGUGCCCUGCUUCUCCA&UGGAGAAGCAGGGCACGU--GCA	0	0.000336282
Potri.012G001400:miR164b-Probable-5p-mature:652	miR164b-Probable-5p-mature	Potri.012G001400	639	661	652	652	10	-44.3	-39.5	0.891648	3	1-18,661-644;19-20,641-640	x-x,643-642[BULt];21-21,639-639[UP3]	.((..((((((((((((((((((&))))))))))))))))))--)).	GGCCUACGUGCCCUGCUUCUCCA&UGGAGAAGCAGGGCACGU--GCA	0	0.000336282
Potri.012G001400:miR164c-Known-5p-mature:652	miR164c-Known-5p-mature	Potri.012G001400	639	661	652	652	10	-44.3	-39.5	0.891648	3	1-18,661-644;19-20,641-640	x-x,643-642[BULt];21-21,639-639[UP3]	.((..((((((((((((((((((&))))))))))))))))))--)).	GGCCUACGUGCCCUGCUUCUCCA&UGGAGAAGCAGGGCACGU--GCA	0	0.000336282
Potri.012G001400:miR164d-Probable-5p-mature:652	miR164d-Probable-5p-mature	Potri.012G001400	639	661	652	652	10	-44.3	-39.5	0.891648	3	1-18,661-644;19-20,641-640	x-x,643-642[BULt];21-21,639-639[UP3]	.((..((((((((((((((((((&))))))))))))))))))--)).	GGCCUACGUGCCCUGCUUCUCCA&UGGAGAAGCAGGGCACGU--GCA	0	0.000336282
Potri.012G001400:miR164e-Known-5p-mature:652	miR164e-Known-5p-mature	Potri.012G001400	639	661	652	652	10	-44.3	-39.5	0.891648	3	1-18,661-644;19-20,641-640	x-x,643-642[BULt];21-21,639-639[UP3]	.((..((((((((((((((((((&))))))))))))))))))--)).	GGCCUACGUGCCCUGCUUCUCCA&UGGAGAAGCAGGGCACGU--GCA	0	0.000336282
Potri.011G025300:miR475a-Probable-3p-star:25	miR475a-Probable-3p-star	Potri.011G025300	14	34	25	25	10	-35.9	-27.9	0.777159	5.5	3-16,32-19;18-21,17-14	1-2,34-33[UP5];17-17,18-18[SIL]	((((.((((((((((((((..&..)))))))))))))).))))	UCAAAGGGCUCUGUAAGGGGU&CACUCUUACAGAGUCCAUUGA	1	0.000423275
Potri.001G002000:miR172c-Probable-3p-mature:1383	miR172c-Probable-3p-mature	Potri.001G002000	1373	1392	1383	1383	10	-34.3	-24.9	0.725948	6	1-2,1392-1391;5-12,1388-1381;14-21,1380-1373	3-4,1390-1389[SIL];13-13,x-x[BULq]	((((((((-((((((((..((&))..)))))))).))))))))	AUGCAGCA-UAUCAAGAGGCU&AGAAUCUUGAUGAUGCUGCAU	2	0.0729546
Potri.001G058600:miRN8-Novel-3p-mature:435	miRN8-Novel-3p-mature	Potri.001G058600	423	444	434	435	9	-32.2	-21.8	0.677019	10	1-5,444-440;7-18,437-426	6-6,439-438[AILt];19-21,425-423[UP3]	...((((((((((((..(((((&)))))-.))))))))))))...	UGAGGGGAAGCGAAGCUGCAGA&UUUGC-UCUUCGUUUUCUCAUG	2	0.531176
Potri.001G166800:miR476-Known-5p-star:1058	miR476-Known-5p-star	Potri.001G166800	1047	1068	1058	1058	10	-30.8	-21.4	0.694805	6.5	1-9,1068-1060;10-18,1058-1050	x-x,1059-1059[BULt];19-21,1049-1047[UP3]	...(((((((((.(((((((((&)))))))))-)))))))))...	GAGUGCAAAGAAUGGAUUAUUG&UAGUAAUCC-UUCUUUGCAAAG	2	0.340742
Potri.001G345300:miR403a-Probable-5p-star:13253	miR403a-Probable-5p-star	Potri.001G345300	13242	13262	13253	13253	10	-31.3	-20.5	0.654952	9.5	1-1,13262-13262;3-9,13260-13254;11-17,13252-13246	2-2,13261-13261[SIL];10-10,13253-13253[SIL];18-21,13245-13242[UP3]	....(((((((.(((((((.(&).))))))).)))))))....	ACAAGGAUUCGAGCACAAAGC&GGUUUGUGCAUGAAUCUAAUA	2	0.17253
Potri.001G356900:miR396a-Probable-3p-star:592	miR396a-Probable-3p-star	Potri.001G356900	581	601	592	592	10	-34.7	-23.4	0.674352	6.5	1-9,601-593;11-15,591-587;17-20,585-582	10-10,592-592[SIL];16-16,586-586[SIL];21-21,581-581[UP3]	.((((.(((((.(((((((((&))))))))).))))).)))).	AGUUUGAUGGCAUUCUUGGAC&GUUCAAGAAAGCCGUGGAAUA	2	0.037168
Potri.002G026800:miR169a-Probable-3p-star:111	miR169a-Probable-3p-star	Potri.002G026800	100	118	111	111	10	-37.6	-24.5	0.651596	7.5	2-5,117-114;8-21,113-100	1-1,118-118[UP5];6-7,x-x[BULq]	((((((((((((((--((((.&.))))..))))))))))))))	GGUGGAGUCAAGAA--GCCUC&CAGGUUGUUCUUGGCUCUACU	2	0.315293
Potri.002G125400:miR477a-Known-3p-star:396	miR477a-Known-3p-star	Potri.002G125400	384	404	395	396	9	-41.7	-28.5	0.683453	5.5	1-2,404-403;4-14,401-391;16-16,389-389;18-21,387-384	3-3,402-402[SIL];15-15,390-390[SIL];17-17,388-388[SIL]	((((.(.(((((((((((.((&)).))))))))))).).))))	UAAUGUGCCCCAGAGGCAGCC&GGAUGCCUUUGGGGGAGAUUG	2	0.0729546
Potri.002G232600:miR167b-Probable-5p-mature:930	miR167b-Probable-5p-mature	Potri.002G232600	919	940	931	930	11	-38.9	-25.3	0.650386	10.5	4-17,937-924;18-19,922-921	1-3,940-938[UP5];x-x,923-923[BULt];20-21,920-919[UP3]	..((.((((((((((((((...&...))))))))))))))-))..	GUGAUUCGUGCUGGUGGCUAUU&UGAAGCUGCCAGCAUGA-UCUA	2	0.140587
Potri.002G232600:miR167d-Probable-5p-mature:930	miR167d-Probable-5p-mature	Potri.002G232600	919	940	931	930	11	-38.9	-25.3	0.650386	10.5	4-17,937-924;18-19,922-921	1-3,940-938[UP5];x-x,923-923[BULt];20-21,920-919[UP3]	..((.((((((((((((((...&...))))))))))))))-))..	GUGAUUCGUGCUGGUGGCUAUU&UGAAGCUGCCAGCAUGA-UCUA	2	0.140587
Potri.002G232600:miR167e-Probable-5p-mature:930	miR167e-Probable-5p-mature	Potri.002G232600	919	940	931	930	11	-38.9	-25.3	0.650386	10.5	4-17,937-924;18-19,922-921	1-3,940-938[UP5];x-x,923-923[BULt];20-21,920-919[UP3]	..((.((((((((((((((...&...))))))))))))))-))..	GUGAUUCGUGCUGGUGGCUAUU&UGAAGCUGCCAGCAUGA-UCUA	2	0.140587
Potri.003G050100:miR166a-Known-3p-mature:562	miR166a-Known-3p-mature	Potri.003G050100	551	571	562	562	10	-44.1	-37.9	0.85941	3	2-19,570-553	1-1,571-571[UP5];20-21,552-551[UP3]	..((((((((((((((((((.&.))))))))))))))))))..	CUGGAAUGAAGCCUGGUCCGG&UCGGACCAGGCUUCAUUCCCC	2	0.037168
Potri.003G050100:miR166b-Probable-3p-mature:562	miR166b-Probable-3p-mature	Potri.003G050100	551	571	562	562	10	-44.1	-37.9	0.85941	3	2-19,570-553	1-1,571-571[UP5];20-21,552-551[UP3]	..((((((((((((((((((.&.))))))))))))))))))..	CUGGAAUGAAGCCUGGUCCGG&UCGGACCAGGCUUCAUUCCCC	2	0.037168
Potri.003G050100:miR166c-Known-3p-mature:562	miR166c-Known-3p-mature	Potri.003G050100	551	571	562	562	10	-44.1	-37.9	0.85941	3	2-19,570-553	1-1,571-571[UP5];20-21,552-551[UP3]	..((((((((((((((((((.&.))))))))))))))))))..	CUGGAAUGAAGCCUGGUCCGG&UCGGACCAGGCUUCAUUCCCC	2	0.037168
Potri.003G050100:miR166e-Probable-3p-mature:562	miR166e-Probable-3p-mature	Potri.003G050100	551	571	562	562	10	-44.1	-37.9	0.85941	3	2-19,570-553	1-1,571-571[UP5];20-21,552-551[UP3]	..((((((((((((((((((.&.))))))))))))))))))..	CUGGAAUGAAGCCUGGUCCGG&UCGGACCAGGCUUCAUUCCCC	2	0.037168
Potri.003G050100:miR166f-Known-3p-mature:562	miR166f-Known-3p-mature	Potri.003G050100	551	571	562	562	10	-44.1	-37.9	0.85941	3	2-19,570-553	1-1,571-571[UP5];20-21,552-551[UP3]	..((((((((((((((((((.&.))))))))))))))))))..	CUGGAAUGAAGCCUGGUCCGG&UCGGACCAGGCUUCAUUCCCC	2	0.037168
Potri.003G050100:miR166g-Known-5p-mature:562	miR166g-Known-5p-mature	Potri.003G050100	551	571	562	562	10	-44.1	-37.9	0.85941	3	2-19,570-553	1-1,571-571[UP5];20-21,552-551[UP3]	..((((((((((((((((((.&.))))))))))))))))))..	CUGGAAUGAAGCCUGGUCCGG&UCGGACCAGGCUUCAUUCCCC	2	0.037168
Potri.003G050100:miR166i-Known-3p-mature:562	miR166i-Known-3p-mature	Potri.003G050100	551	571	562	562	10	-44.1	-37.9	0.85941	3	2-19,570-553	1-1,571-571[UP5];20-21,552-551[UP3]	..((((((((((((((((((.&.))))))))))))))))))..	CUGGAAUGAAGCCUGGUCCGG&UCGGACCAGGCUUCAUUCCCC	2	0.037168
Potri.003G050100:miR166j-Probable-3p-mature:562	miR166j-Probable-3p-mature	Potri.003G050100	551	571	562	562	10	-44.1	-37.9	0.85941	3	2-19,570-553	1-1,571-571[UP5];20-21,552-551[UP3]	..((((((((((((((((((.&.))))))))))))))))))..	CUGGAAUGAAGCCUGGUCCGG&UCGGACCAGGCUUCAUUCCCC	2	0.037168
Potri.003G050100:miR166l-Known-3p-mature:562	miR166l-Known-3p-mature	Potri.003G050100	551	571	562	562	10	-44.1	-37.9	0.85941	3	2-19,570-553	1-1,571-571[UP5];20-21,552-551[UP3]	..((((((((((((((((((.&.))))))))))))))))))..	CUGGAAUGAAGCCUGGUCCGG&UCGGACCAGGCUUCAUUCCCC	2	0.037168
Potri.003G050100:miR166m-Known-3p-mature:562	miR166m-Known-3p-mature	Potri.003G050100	551	571	562	562	10	-44.1	-37.9	0.85941	3	2-19,570-553	1-1,571-571[UP5];20-21,552-551[UP3]	..((((((((((((((((((.&.))))))))))))))))))..	CUGGAAUGAAGCCUGGUCCGG&UCGGACCAGGCUUCAUUCCCC	2	0.037168
Potri.003G050100:miR166n-Known-3p-mature:562	miR166n-Known-3p-mature	Potri.003G050100	551	571	562	562	10	-44.1	-37.9	0.85941	3	2-19,570-553	1-1,571-571[UP5];20-21,552-551[UP3]	..((((((((((((((((((.&.))))))))))))))))))..	CUGGAAUGAAGCCUGGUCCGG&UCGGACCAGGCUUCAUUCCCC	2	0.037168
Potri.003G099900:miR395a-Known-5p-star:249	miR395a-Known-5p-star	Potri.003G099900	227	259	250	249	11	-39.2	-26	0.663265	25.5	1-10,259-250;11-16,238-233;17-20,231-228	x-x,249-239[BULt];x-x,232-232[BULt];21-21,227-227[UP3]	.((((.((((((...........((((((((((&))))))))))-----------))))))-)))).	UGGUGCAAGUGCGUCAUGUUUCAUCAAGGGAGC&GUUCCCUUGA-----------GCACUU-CACUG	2	0.232897
Potri.003G178000:miR166e-Probable-5p-star:549	miR166e-Probable-5p-star	Potri.003G178000	539	558	549	549	10	-40.8	-27.3	0.669118	7	1-11,558-548;14-19,546-541	12-13,547-547[AILq];20-21,540-539[UP3]	..((((((.-(((((((((((&)))))))))))..))))))..	ACUUGAGUG-GCCAGCAUUCC&GGAAUGUUGGCUGGCUCGAAG	2	0.0729546
Potri.004G101250:miR396g-Known-3p-star:4831	miR396g-Known-3p-star	Potri.004G101250	4819	4839	4830	4831	9	-36.7	-25.4	0.692098	5.5	2-10,4838-4830;11-18,4828-4821;20-20,4819-4819	1-1,4839-4839[UP5];x-x,4829-4829[BULt];19-19,4820-4820[SIL]	(.((((((((.(((((((((.&.)))))))))-)))))))).)	UGUCCCGCAGAUUUUCUUGAA&CUCAAGAAAG-CUGUGGGAGA	2	0.037168
Potri.006G036300:miR169b-Probable-3p-star:607	miR169b-Probable-3p-star	Potri.006G036300	596	615	606	607	9	-38.8	-26.1	0.67268	7	1-17,615-599	18-20,598-596[UP3]	...(((((((((((((((((&)))))))))))))))))...	CAGAGCCAAAGGGGGUUGUC&GGCAGUCUCCUUUGGCUAUC	2	0.203285
Potri.006G054100:miR167a-Probable-5p-mature:2486	miR167a-Probable-5p-mature	Potri.006G054100	2472	2493	2485	2486	9	-42.5	-28.2	0.663529	5	2-9,2492-2485;11-16,2484-2479;18-22,2477-2473	1-1,2493-2493[UP5];10-10,x-x[BULq];17-17,2478-2478[SIL];23-23,2472-2472[UP3]	.(((((.((((((-((((((((.&.)))))))).)))))).))))).	AUUAGAACAUGCU-GCAGCUUCU&UGAAGCUGCCAGCAUGAUCUAAC	2	0.037168
Potri.006G054100:miR167b-Probable-5p-mature:2486	miR167b-Probable-5p-mature	Potri.006G054100	2474	2493	2485	2486	9	-38.9	-27.4	0.70437	4	2-9,2492-2485;11-16,2484-2479;18-21,2477-2474	1-1,2493-2493[UP5];10-10,x-x[BULq];17-17,2478-2478[SIL]	((((.((((((-((((((((.&.)))))))).)))))).))))	UAGAACAUGCU-GCAGCUUCU&UGAAGCUGCCAGCAUGAUCUA	2	0.037168
Potri.006G054100:miR167c-Probable-5p-mature:2486	miR167c-Probable-5p-mature	Potri.006G054100	2474	2493	2485	2486	9	-40.2	-27	0.671642	4.5	2-9,2492-2485;11-16,2484-2479;18-21,2477-2474	1-1,2493-2493[UP5];10-10,x-x[BULq];17-17,2478-2478[SIL]	((((.((((((-((((((((.&.)))))))).)))))).))))	UAGAACAUGCU-GCAGCUUCU&UGAAGCUGCCAGCAUGAUCUG	2	0.037168
Potri.006G054100:miR167d-Probable-5p-mature:2486	miR167d-Probable-5p-mature	Potri.006G054100	2474	2493	2485	2486	9	-38.9	-27.4	0.70437	4	2-9,2492-2485;11-16,2484-2479;18-21,2477-2474	1-1,2493-2493[UP5];10-10,x-x[BULq];17-17,2478-2478[SIL]	((((.((((((-((((((((.&.)))))))).)))))).))))	UAGAACAUGCU-GCAGCUUCU&UGAAGCUGCCAGCAUGAUCUA	2	0.037168
Potri.006G054100:miR167e-Probable-5p-mature:2486	miR167e-Probable-5p-mature	Potri.006G054100	2474	2493	2485	2486	9	-38.9	-27.4	0.70437	4	2-9,2492-2485;11-16,2484-2479;18-21,2477-2474	1-1,2493-2493[UP5];10-10,x-x[BULq];17-17,2478-2478[SIL]	((((.((((((-((((((((.&.)))))))).)))))).))))	UAGAACAUGCU-GCAGCUUCU&UGAAGCUGCCAGCAUGAUCUA	2	0.037168
Potri.006G054100:miR167g-Known-5p-mature:2486	miR167g-Known-5p-mature	Potri.006G054100	2473	2493	2485	2486	9	-39.8	-25.9	0.650754	6	2-9,2492-2485;11-16,2484-2479;18-20,2477-2475	1-1,2493-2493[UP5];10-10,x-x[BULq];17-17,2478-2478[SIL];21-22,2474-2473[UP3]	..(((.((((((-((((((((.&.)))))))).)))))).)))..	UUAGAACAUGCU-GCAGCUUCU&UGAAGCUGCCAGCAUGAUCUUA	2	0.107411
Potri.006G132450:miR6457a-Probable-3p-star:748	miR6457a-Probable-3p-star	Potri.006G132450	741	757	748	748	10	-33	-21.7	0.657576	8	3-12,755-746;14-17,745-742	1-2,757-756[UP5];13-13,x-x[BULq];18-18,741-741[UP3]	.((((-((((((((((..&..)))))))))).)))).	GCUGG-CUCCCGGCGGUC&CUCUGCUGGGAGAUUAGA	2	0.288861
Potri.006G139500:miR395a-Known-3p-mature:713	miR395a-Known-3p-mature	Potri.006G139500	698	723	714	713	11	-39.1	-25.7	0.657289	13.5	2-10,722-714;11-17,708-702;19-21,700-698	1-1,723-723[UP5];x-x,713-709[BULt];18-18,701-701[SIL]	(((.(((((((.....(((((((((.&.)))))))))-----))))))).)))	GAGAUUCCCCAUUUUGGACACUUCAU&CUGAAGUGUU-----UGGGGGAACUC	2	0.037168
Potri.006G139500:miR395b-Probable-3p-mature:713	miR395b-Probable-3p-mature	Potri.006G139500	698	723	714	713	11	-39.1	-25.7	0.657289	13.5	2-10,722-714;11-17,708-702;19-21,700-698	1-1,723-723[UP5];x-x,713-709[BULt];18-18,701-701[SIL]	(((.(((((((.....(((((((((.&.)))))))))-----))))))).)))	GAGAUUCCCCAUUUUGGACACUUCAU&CUGAAGUGUU-----UGGGGGAACUC	2	0.037168
Potri.006G139500:miR395c-Probable-3p-mature:713	miR395c-Probable-3p-mature	Potri.006G139500	698	723	714	713	11	-39.1	-25.7	0.657289	13.5	2-10,722-714;11-17,708-702;19-21,700-698	1-1,723-723[UP5];x-x,713-709[BULt];18-18,701-701[SIL]	(((.(((((((.....(((((((((.&.)))))))))-----))))))).)))	GAGAUUCCCCAUUUUGGACACUUCAU&CUGAAGUGUU-----UGGGGGAACUC	2	0.037168
Potri.006G139500:miR395d-Probable-3p-mature:713	miR395d-Probable-3p-mature	Potri.006G139500	698	723	714	713	11	-39.1	-25.7	0.657289	13.5	2-10,722-714;11-17,708-702;19-21,700-698	1-1,723-723[UP5];x-x,713-709[BULt];18-18,701-701[SIL]	(((.(((((((.....(((((((((.&.)))))))))-----))))))).)))	GAGAUUCCCCAUUUUGGACACUUCAU&CUGAAGUGUU-----UGGGGGAACUC	2	0.037168
Potri.006G139500:miR395e-Probable-3p-mature:713	miR395e-Probable-3p-mature	Potri.006G139500	698	723	714	713	11	-39.1	-25.7	0.657289	13.5	2-10,722-714;11-17,708-702;19-21,700-698	1-1,723-723[UP5];x-x,713-709[BULt];18-18,701-701[SIL]	(((.(((((((.....(((((((((.&.)))))))))-----))))))).)))	GAGAUUCCCCAUUUUGGACACUUCAU&CUGAAGUGUU-----UGGGGGAACUC	2	0.037168
Potri.006G139500:miR395f-Known-3p-mature:713	miR395f-Known-3p-mature	Potri.006G139500	698	723	714	713	11	-39.1	-25.7	0.657289	13.5	2-10,722-714;11-17,708-702;19-21,700-698	1-1,723-723[UP5];x-x,713-709[BULt];18-18,701-701[SIL]	(((.(((((((.....(((((((((.&.)))))))))-----))))))).)))	GAGAUUCCCCAUUUUGGACACUUCAU&CUGAAGUGUU-----UGGGGGAACUC	2	0.037168
Potri.008G035200:miR171a-Known-3p-mature:1303	miR171a-Known-3p-mature	Potri.008G035200	1293	1313	1304	1303	11	-40.3	-26.7	0.662531	8	2-4,1312-1310;6-12,1308-1302;15-22,1300-1293	1-1,1313-1313[UP5];5-5,1309-1309[SIL];13-14,1301-1301[AILq]	((((((((.-(((((((.(((.&.))).)))))))..))))))))	GAGUGAUGG-GGUGCGGGUUAU&UUGAGCCGCGCCAAUAUCACUU	2	0.037168
Potri.008G035200:miR171d-Known-3p-mature:1303	miR171d-Known-3p-mature	Potri.008G035200	1293	1313	1304	1303	11	-40.3	-26.7	0.662531	8	2-4,1312-1310;6-12,1308-1302;15-22,1300-1293	1-1,1313-1313[UP5];5-5,1309-1309[SIL];13-14,1301-1301[AILq]	((((((((.-(((((((.(((.&.))).)))))))..))))))))	GAGUGAUGG-GGUGCGGGUUAU&UUGAGCCGCGCCAAUAUCACUU	2	0.037168
Potri.008G159500:miR164a-Known-3p-star:296	miR164a-Known-3p-star	Potri.008G159500	285	305	296	296	10	-40.1	-29.7	0.740648	6	3-3,303-303;5-20,301-286	1-2,305-304[UP5];4-4,302-302[SIL];21-21,285-285[UP3]	.((((((((((((((((.(..&..).)))))))))))))))).	UUUGGAGAAGAAGAGCGAGGA&CACGCGCUCUUCUUCUCCAAC	2	0.037168
Potri.009G015400:miR319j-Probable-5p-star:592	miR319j-Probable-5p-star	Potri.009G015400	582	603	592	592	10	-38.8	-25.5	0.657216	9	1-5,603-599;6-11,596-591;14-20,588-582	x-x,598-597[BULt];12-13,590-589[SIL]	(((((((..((((((..(((((&)))))--))))))..)))))))	GAGUGGGGAGAAGGAAGGGCUU&GAGCU--UCCUUCAGUCCACUC	2	0.288861
Potri.009G015400:miRN8-Novel-3p-mature:595	miRN8-Novel-3p-mature	Potri.009G015400	584	604	595	595	10	-32.2	-21.1	0.65528	12	4-10,601-595;12-18,593-587	1-3,604-602[UP5];11-11,594-594[SIL];19-21,586-584[UP3]	...(((((((.(((((((...&...))))))).)))))))...	GUGGGGAGAAGGAAGGGCUUC&UUUGCUCUUCGUUUUCUCAUG	2	0.744249
Potri.009G040500:miR169a-Probable-3p-star:1816	miR169a-Probable-3p-star	Potri.009G040500	1806	1825	1816	1816	10	-37.6	-25	0.664894	8.5	1-5,1825-1821;7-10,1819-1816;13-21,1814-1806	6-6,1820-1820[SIL];11-12,1815-1815[AILq]	(((((((((.-((((.(((((&))))).))))..)))))))))	AGUAGGGCCU-GGAUUACCUG&CAGGUUGUUCUUGGCUCUACU	2	0.203285
Potri.009G157500:miR319d-Known-3p-mature:17	miR319d-Known-3p-mature	Potri.009G157500	8	27	18	17	11	-35.2	-23.1	0.65625	8	1-14,27-14	15-20,13-8[UP3]	......((((((((((((((&))))))))))))))......	UCUCAGCCCUUCAGUCCAGA&UUUGGAUUGAAGGGAGCUCU	2	0.288861
Potri.009G157500:miR319h-Known-3p-mature:17	miR319h-Known-3p-mature	Potri.009G157500	8	27	18	17	11	-35.2	-23.1	0.65625	8	1-14,27-14	15-20,13-8[UP3]	......((((((((((((((&))))))))))))))......	UCUCAGCCCUUCAGUCCAGA&UUUGGAUUGAAGGGAGCUCU	2	0.288861
Potri.010G038400:miR396d-Probable-5p-mature:301	miR396d-Probable-5p-mature	Potri.010G038400	292	310	301	301	10	-34.9	-22.8	0.653295	7.5	4-12,307-299;14-18,298-294;20-21,293-292	1-3,310-308[UP5];13-13,x-x[BULq];19-19,x-x[BULq]	((-(((((-(((((((((...&...))))))))).))))).))	GG-UCAAG-AAGCCGUGGCCG&UUUCCACGGCUUUCUUGAACU	2	0.388838
Potri.010G101200:miR319g-Probable-3p-star:201	miR319g-Probable-3p-star	Potri.010G101200	190	211	202	201	11	-37.1	-25.1	0.67655	5.5	1-12,211-200;14-18,198-194;20-21,193-192	13-13,199-199[SIL];19-19,x-x[BULq];22-23,191-190[UP3]	..((-(((((.((((((((((((&)))))))))))).))))).))..	AGCC-AAGGGUUUCAAAGAGACC&GGUUUCUUUGAAUCUCUUAGGAG	2	0.037168
Potri.011G006800:miR396a-Probable-5p-mature:69	miR396a-Probable-5p-mature	Potri.011G006800	58	78	69	69	10	-33.4	-23.8	0.712575	7.5	1-16,78-63	17-21,62-58[UP3]	.....((((((((((((((((&)))))))))))))))).....	GCUGAUAAGAAGGCUGUGGGA&UUCCACAGCUUUCUUGAACUU	2	0.140587
Potri.011G006800:miR396b-Known-5p-mature:69	miR396b-Known-5p-mature	Potri.011G006800	55	78	69	69	10	-35.1	-24.92	0.709972	7.5	1-16,78-63;19-21,57-55	17-18,62-58[AILt]	(((.....((((((((((((((((&))))))))))))))))---..)))	CAGGCUGAUAAGAAGGCUGUGGGA&UUCCACAGCUUUCUUG---AACUG	2	0.140587
Potri.011G006800:miR396c-Probable-5p-mature:69	miR396c-Probable-5p-mature	Potri.011G006800	58	78	69	69	10	-33.4	-23.8	0.712575	7.5	1-16,78-63	17-21,62-58[UP3]	.....((((((((((((((((&)))))))))))))))).....	GCUGAUAAGAAGGCUGUGGGA&UUCCACAGCUUUCUUGAACUU	2	0.140587
Potri.011G006800:miR396e-Probable-5p-mature:69	miR396e-Probable-5p-mature	Potri.011G006800	58	78	69	69	10	-34.9	-23.1	0.661891	8.5	1-16,78-63	17-21,62-58[UP3]	.....((((((((((((((((&)))))))))))))))).....	GCUGAUAAGAAGGCUGUGGGA&UUCCACGGCUUUCUUGAACUU	2	0.288861
Potri.011G006800:miR396f-Known-5p-mature:69	miR396f-Known-5p-mature	Potri.011G006800	55	78	69	69	10	-35.1	-24.92	0.709972	7.5	1-16,78-63;19-21,57-55	17-18,62-58[AILt]	(((.....((((((((((((((((&))))))))))))))))---..)))	CAGGCUGAUAAGAAGGCUGUGGGA&UUCCACAGCUUUCUUG---AACUG	2	0.140587
Potri.011G006800:miR396g-Known-5p-mature:69	miR396g-Known-5p-mature	Potri.011G006800	58	78	69	69	10	-33.4	-23.8	0.712575	7.5	1-16,78-63	17-21,62-58[UP3]	.....((((((((((((((((&)))))))))))))))).....	GCUGAUAAGAAGGCUGUGGGA&UUCCACAGCUUUCUUGAACUU	2	0.140587
Potri.011G006800:miR530-Known-3p-star:339	miR530-Known-3p-star	Potri.011G006800	328	348	339	339	10	-46.4	-31.4	0.676724	6	1-2,348-347;4-4,345-345;6-20,343-329	3-3,346-346[SIL];5-5,344-344[SIL];21-21,328-328[UP3]	.(((((((((((((((.(.((&)).).))))))))))))))).	GCUGCGCUUGCACCUGGAACU&AGGUGCAGGUGCAGGUGCAGG	2	0.17253
Potri.011G010500:miR1446b-Probable-3p-star:1095	miR1446b-Probable-3p-star	Potri.011G010500	1083	1103	1095	1095	10	-39.8	-26.6	0.668342	9	3-9,1101-1095;11-14,1094-1091;15-18,1089-1086	1-2,1103-1102[UP5];10-10,x-x[BULq];x-x,1090-1090[BULt];19-21,1085-1083[UP3]	...((((.((((-(((((((..&..))))))).))))-))))...	GGAUCUGAAGCC-CCCACCUGC&CAAGGUGGGAGGCU-CAGAAAA	2	0.140587
Potri.011G103700:miR6434-Known-5p-mature:913	miR6434-Known-5p-mature	Potri.011G103700	900	924	912	913	9	-33.7	-24.6	0.72997	11.5	1-7,924-918;8-12,914-910;13-20,908-901	x-x,917-915[BULt];x-x,909-909[BULt];21-21,900-900[UP3]	.((((((((.(((((...(((((((&)))))))---)))))-)))))))).	GGGUUGGUCGGAGCACACUACAUGG&CUAUGUA---UGCUU-GACCAAUCA	2	0.0729546
Potri.013G119700:miRN8-Novel-3p-mature:962	miRN8-Novel-3p-mature	Potri.013G119700	952	976	963	962	11	-32.2	-21.7	0.673913	14	1-8,976-969;9-12,964-961;14-20,959-953	x-x,968-965[BULt];13-13,960-960[SIL];21-21,952-952[UP3]	.(((((((.((((....((((((((&))))))))----)))).))))))).	GAUGAGGGUGCGAAGAUGGAGCAGA&UUUGCUCU----UCGUUUUCUCAUG	2	0.597086
Potri.014G139500:miR319j-Probable-5p-star:791	miR319j-Probable-5p-star	Potri.014G139500	782	801	791	791	10	-38.8	-26	0.670103	6	3-7,799-795;8-12,793-789;14-20,788-782	1-2,801-800[UP5];x-x,794-794[BULt];13-13,x-x[BULq]	(((((((-(((((.(((((..&..)))))-))))).)))))))	GAGUGGA-UGAAGCGAAGCAG&GAGCUUC-CUUCAGUCCACUC	2	0.261409
Potri.014G170500:miR167c-Probable-3p-star:209	miR167c-Probable-3p-star	Potri.014G170500	199	219	209	209	10	-32.3	-22	0.681115	9.5	3-4,217-216;6-9,214-211;10-20,209-199	1-2,219-218[UP5];5-5,215-215[SIL];x-x,210-210[BULt]	(((((((((((.((((.((..&..)).))))-)))))))))))	GAUGAGACUGCUCACGCGAGC&GAUCAUGUG-GUAGUUUCAUC	2	0.232897
Potri.015G061800:miRN8-Novel-3p-mature:1184	miRN8-Novel-3p-mature	Potri.015G061800	1173	1194	1185	1184	11	-32.2	-21.7	0.673913	11.5	5-12,1190-1183;13-21,1181-1173	1-4,1194-1191[UP5];x-x,1182-1182[BULt]	(((((((((.((((((((....&....))))))))-)))))))))	CAUGAGAAGCAUGGAGAGAGCU&UUUGCUCUUCGU-UUUCUCAUG	2	0.581533
Potri.015G068900:miR475a-Probable-5p-mature:232	miR475a-Probable-5p-mature	Potri.015G068900	221	241	232	232	10	-34.2	-26.4	0.77193	9	4-20,238-222	1-3,241-239[UP5];21-21,221-221[UP3]	.(((((((((((((((((...&...))))))))))))))))).	CUUGCUCUUAUGAUGGCCGAG&AAUGGCCAUUGUAAGAGUAGA	2	0.0729546
Potri.015G071200:miR472b-Known-3p-mature:1351	miR472b-Known-3p-mature	Potri.015G071200	1340	1360	1351	1351	10	-43.3	-28.5	0.658199	11	3-7,1358-1354;10-10,1351-1351;12-17,1349-1344;19-22,1343-1340	1-2,1360-1359[UP5];8-9,1353-1352[SIL];11-11,1350-1350[SIL];18-18,x-x[BULq]	((((-((((((.(..(((((..&..)))))..).)))))).))))	GGGA-GGGUGGUGGAGGGGAUU&UUUUCCCAACUCCACCCAUCCC	2	0.203285
Potri.015G071200:miR482a-Known-3p-mature:1351	miR482a-Known-3p-mature	Potri.015G071200	1340	1360	1351	1351	10	-43.7	-29.1	0.665904	9	3-8,1358-1353;10-10,1351-1351;12-17,1349-1344;19-22,1343-1340	1-2,1360-1359[UP5];9-9,1352-1352[SIL];11-11,1350-1350[SIL];18-18,x-x[BULq]	((((-((((((.(.((((((..&..)))))).).)))))).))))	GGGA-GGGUGGUGGAGGGGAUU&UUUUCCCUACUCCACCCAUCCC	2	0.232897
Potri.015G105100:miR395b-Probable-5p-star:947	miR395b-Probable-5p-star	Potri.015G105100	933	957	948	947	11	-37.2	-24.3	0.653226	10	3-13,955-945;14-18,940-936	1-2,957-956[UP5];x-x,944-941[BULt];19-21,935-933[UP3]	...(((((....(((((((((((..&..)))))))))))----)))))...	UGCUGAAGGUCUUGCUCAGAGGAUA&GUUCCUCUGAGCA----CUUCAUUG	2	0.17253
Potri.015G105100:miR395e-Probable-5p-star:947	miR395e-Probable-5p-star	Potri.015G105100	933	957	948	947	11	-37.2	-24.3	0.653226	10	3-13,955-945;14-18,940-936	1-2,957-956[UP5];x-x,944-941[BULt];19-21,935-933[UP3]	...(((((....(((((((((((..&..)))))))))))----)))))...	UGCUGAAGGUCUUGCUCAGAGGAUA&GUUCCUCUGAGCA----CUUCAUUG	2	0.17253
Potri.015G105100:miR395f-Known-5p-star:947	miR395f-Known-5p-star	Potri.015G105100	933	957	948	947	11	-37.2	-24.5	0.658602	10	3-13,955-945;14-18,940-936	1-2,957-956[UP5];x-x,944-941[BULt];19-21,935-933[UP3]	...(((((....(((((((((((..&..)))))))))))----)))))...	UGCUGAAGGUCUUGCUCAGAGGAUA&GUUCCUCUGAGCA----CUUCAAUG	2	0.107411
Potri.016G085800:miR477b-Probable-3p-star:139	miR477b-Probable-3p-star	Potri.016G085800	127	148	139	139	10	-39.4	-26	0.659898	6.5	2-12,147-137;13-19,135-129	1-1,148-148[UP5];x-x,136-136[BULt];20-21,128-127[UP3]	..(((((((.(((((((((((.&.)))))))))))-)))))))..	UCAUCUCAUGCCAAAGGCAUUG&GGAUGCCUUUGG-GUGAGAUUG	2	0.140587
Potri.017G016200:miR319g-Probable-5p-mature:4565	miR319g-Probable-5p-mature	Potri.017G016200	4550	4575	4566	4565	11	-38.5	-25.4	0.65974	14.5	1-7,4575-4569;9-12,4567-4564;13-20,4557-4550	8-8,4568-4568[SIL];x-x,4563-4558[BULt]	((((((((......((((.(((((((&))))))).))))------))))))))	GGAGCUUCAUUAAGCUUCCAUCCAAG&CUUGGAUUGAAG------GGAGCUCC	2	0.140587
Potri.017G035300:miR482c-Known-3p-mature:1075	miR482c-Known-3p-mature	Potri.017G035300	1063	1084	1075	1075	10	-43.3	-31.3	0.722864	5.5	1-9,1084-1076;11-18,1074-1067;21-22,1064-1063	10-10,1075-1075[SIL];19-20,1066-1065[SIL]	((..((((((((.(((((((((&))))))))).))))))))..))	GGGAUGGGGGGAAUUGGAAAGA&UCUUUCCGAGUCCUCCCAUACC	2	0.037168
Potri.017G058200:miR399b-Known-5p-star:620	miR399b-Known-5p-star	Potri.017G058200	609	629	620	620	10	-37.6	-26.8	0.712766	5.5	2-16,628-614;18-18,612-612	1-1,629-629[UP5];17-17,613-613[SIL];19-21,611-609[UP3]	...(.(((((((((((((((.&.))))))))))))))).)...	AGAGGCAGAGGAGAAUUGCAA&GUGCAAUUCUCCUUUGGCAGA	2	0.0729546
Potri.017G073200:miR2111a-Known-5p-mature:482	miR2111a-Known-5p-mature	Potri.017G073200	469	491	481	482	9	-35.7	-24.7	0.691877	8.5	3-5,489-487;6-15,485-476;16-20,474-470	1-2,491-490[UP5];x-x,486-486[BULt];x-x,475-475[BULt];21-21,469-469[UP3]	.(((((.((((((((((.(((..&..)))-))))))))))-))))).	GGGGCCUUCAGGAUGCAUGAUGC&UAAUC-UGCAUCCUGA-GGUUUG	2	0.107411
Potri.017G073200:miR2111b-Known-5p-mature:482	miR2111b-Known-5p-mature	Potri.017G073200	469	491	481	482	9	-35.7	-24.7	0.691877	8.5	3-5,489-487;6-15,485-476;16-20,474-470	1-2,491-490[UP5];x-x,486-486[BULt];x-x,475-475[BULt];21-21,469-469[UP3]	.(((((.((((((((((.(((..&..)))-))))))))))-))))).	GGGGCCUUCAGGAUGCAUGAUGC&UAAUC-UGCAUCCUGA-GGUUUG	2	0.107411
Potri.018G006000:miR482b-Known-3p-mature:1476	miR482b-Known-3p-mature	Potri.018G006000	1465	1485	1476	1476	10	-38.6	-26.9	0.696891	8	3-18,1483-1468	1-2,1485-1484[UP5];19-21,1467-1465[UP3]	...((((((((((((((((..&..))))))))))))))))...	CCCUUGUUCGAUCCUCCCAGG&UAUGGGAGGAUUGGACAGUAC	2	0.107411
Potri.019G130900:miR164b-Probable-3p-star:1133	miR164b-Probable-3p-star	Potri.019G130900	1123	1144	1133	1133	10	-39.8	-26.4	0.663317	7	1-3,1144-1142;4-9,1140-1135;10-18,1133-1125;20-21,1124-1123	x-x,1141-1141[BULt];x-x,1134-1134[BULt];19-19,x-x[BULq]	((-(((((((((.((((((.(((&)))-))))))-))))))))).))	GA-GAGGAAGACAAGGUGCAAUG&CAU-GUGCCU-GUCUUCCUCAUC	2	0.17253
Potri.001G345300:miR164b-Probable-3p-star:12282	miR164b-Probable-3p-star	Potri.001G345300	12271	12290	12282	12282	10	-39.8	-27.2	0.683417	7	3-3,12288-12288;5-9,12286-12282;11-21,12281-12271	1-2,12290-12289[UP5];4-4,12287-12287[SIL];10-10,x-x[BULq]	(((((((((((-(((((.(..&..).))))).)))))))))))	GAUGAGGAAGA-AGGCAGAAC&CAUGUGCCUGUCUUCCUCAUC	3	0.132102
Potri.001G345300:miRN8-Novel-3p-mature:10912	miRN8-Novel-3p-mature	Potri.001G345300	10900	10921	10912	10912	10	-32.2	-21.7	0.673913	9	1-10,10921-10912;13-18,10908-10903	11-12,10911-10909[AILt];19-21,10902-10900[UP3]	...((((((...((((((((((&))))))))))-..))))))...	GAAGAGAAAUUAGAAGAGCAAA&UUUGCUCUUC-GUUUUCUCAUG	3	0.524707
Potri.001G345300:miRN8-Novel-3p-mature:1621	miRN8-Novel-3p-mature	Potri.001G345300	1609	1631	1621	1621	10	-32.2	-21.1	0.65528	8.5	2-5,1630-1627;6-11,1625-1620;12-20,1618-1610	1-1,1631-1631[UP5];x-x,1626-1626[BULt];x-x,1619-1619[BULt];21-21,1609-1609[UP3]	.(((((((((.((((((.((((.&.))))-))))))-))))))))).	AAUGAGAAGAUUGAAGACGCAGG&UUUGC-UCUUCG-UUUUCUCAUG	3	0.730327
Potri.001G356900:miR399a-Probable-5p-star:1399	miR399a-Probable-5p-star	Potri.001G356900	1387	1408	1399	1399	10	-41.9	-27.3	0.651551	8	1-5,1408-1404;7-10,1402-1399;12-18,1398-1392;20-22,1390-1388	6-6,1403-1403[SIL];11-11,x-x[BULq];19-19,1391-1391[SIL];23-23,1387-1387[UP3]	.(((.(((((((-((((.(((((&))))).)))).))))))).))).	GUUGGCGAGGGA-GAUGUAGCCC&GGGCUUUAUCCUCCUUUGGCAAA	3	0.162305
Potri.001G358300:miR396e-Probable-5p-mature:88	miR396e-Probable-5p-mature	Potri.001G358300	78	97	89	88	11	-34.9	-23.2	0.664756	7.5	1-5,97-93;7-17,92-82	6-6,x-x[BULq];18-21,81-78[UP3]	....(((((((((((-(((((&))))).)))))))))))....	GCUGUCGAGGAAGCC-UGGAA&UUCCACGGCUUUCUUGAACUU	3	0.246752
Potri.001G401300:miR530-Known-3p-star:98	miR530-Known-3p-star	Potri.001G401300	82	107	97	98	9	-46.4	-31	0.668103	14.5	2-6,106-102;8-10,99-97;11-21,92-82	1-1,107-107[UP5];7-7,101-100[AILt];x-x,96-93[BULt]	(((((((((((....(((..(((((.&.)))))-.)))----)))))))))))	CCUGCACUUGCCAUUACCAGGCACUA&AGGUGC-AGGU----GCAGGUGCAGG	3	0.219594
Potri.002G100900:miR6459-Probable-5p-star:248	miR6459-Probable-5p-star	Potri.002G100900	237	257	248	248	10	-34.8	-22.7	0.652299	7	2-12,256-246;15-17,243-241	1-1,257-257[UP5];13-14,245-244[SIL];18-21,240-237[UP3]	....(((..(((((((((((.&.)))))))))))..)))....	UCAAGAAAGUGUGCUUGAGCA&AGCUCAAGCACAAAUUCGAUC	3	0.0348002
Potri.002G125400:miR472b-Known-3p-mature:973	miR472b-Known-3p-mature	Potri.002G125400	955	981	973	973	10	-43.3	-29.1	0.672055	11	2-9,980-973;11-14,972-969;15-22,962-955	1-1,981-981[UP5];10-10,x-x[BULq];x-x,968-963[BULt]	((((((((......((((-((((((((.&.)))))))).))))------))))))))	GGGAUGGGAGUGGUUGGA-UUGGGAGGU&UUUUCCCAACUCCA------CCCAUCCC	3	0.162305
Potri.002G209900:miR6427-Known-5p-mature:768	miR6427-Known-5p-mature	Potri.002G209900	755	778	768	768	10	-34.5	-22.5	0.652174	10.5	3-6,776-773;8-17,770-761;18-22,759-755	1-2,778-777[UP5];7-7,772-771[AILt];x-x,760-760[BULt]	(((((.((((((((((..((((..&..))))-.))))))))))-)))))	UUGUGAAGAGUGGAGCCUUUGCUA&UCGUAA-UGCUUCAUUCU-CACAA	3	0.0348002
Potri.002G232600:miR166i-Known-5p-star:1873	miR166i-Known-5p-star	Potri.002G232600	1863	1883	1874	1873	11	-37.7	-27.5	0.729443	7.5	1-2,1883-1882;5-9,1879-1875;11-21,1873-1863	3-4,1881-1880[SIL];10-10,1874-1874[SIL]	(((((((((((.(((((..((&))..))))).)))))))))))	UCUUGAGUCAGUCAGCAGGCU&GGAAUGCUGUCUGAUUCGAGA	3	0.0348002
Potri.003G050100:miR166k-Known-3p-mature:564	miR166k-Known-3p-mature	Potri.003G050100	553	572	564	564	10	-42	-38.4	0.914286	2	1-2,572-571;4-21,570-553	3-3,x-x[BULq]	((((((((((((((((((-((&)).))))))))))))))))))	GGAAUGAAGCCUGGUCCG-GA&UCUCGGACCAGGCUUCAUUCC	3	0.0348002
Potri.003G050100:miR166p-Known-3p-mature:564	miR166p-Known-3p-mature	Potri.003G050100	553	572	564	564	10	-42	-38.4	0.914286	2	1-2,572-571;4-21,570-553	3-3,x-x[BULq]	((((((((((((((((((-((&)).))))))))))))))))))	GGAAUGAAGCCUGGUCCG-GA&UCUCGGACCAGGCUUCAUUCC	3	0.0348002
Potri.003G050100:miR477c-Known-5p-star:854	miR477c-Known-5p-star	Potri.003G050100	842	867	853	854	9	-40.8	-28.3	0.693627	14	2-6,866-862;7-8,856-855;10-20,853-843	1-1,867-867[UP5];x-x,861-857[BULt];9-9,854-854[SIL];21-21,842-842[UP3]	.(((((((((((.((.....(((((.&.)))))-----)).))))))))))).	AUGGAAGCCUUGUGGUUUGUGAGAGA&ACUCUC-----CCUCAAGGCUUCCAA	3	0.0683894
Potri.003G114000:miR482b-Known-3p-mature:60	miR482b-Known-3p-mature	Potri.003G114000	48	69	60	60	10	-38.6	-26.2	0.678756	5.5	2-15,68-55;18-21,51-48	1-1,69-69[UP5];16-17,54-52[AILt]	((((...((((((((((((((.&.))))))))))))))-..))))	GUGCAAAUCCAAUCCUUCCAUC&UAUGGGAGGAUUGGA-CAGUAC	3	0.162305
Potri.003G114000:miRN8-Novel-3p-mature:828	miRN8-Novel-3p-mature	Potri.003G114000	817	838	828	828	10	-32.2	-21	0.652174	7	2-6,837-833;7-9,831-829;11-21,827-817	1-1,838-838[UP5];x-x,832-832[BULt];10-10,828-828[SIL]	(((((((((((.(((.(((((.&.)))))-))).)))))))))))	UAUGAGAAGGCCAAGAAGCAAG&UUUGCU-CUUCGUUUUCUCAUG	3	0.739712
Potri.003G180700:miR164e-Known-3p-star:694	miR164e-Known-3p-star	Potri.003G180700	682	706	693	694	9	-41.9	-28.28	0.67494	13.5	1-4,706-703;7-8,698-697;9-21,694-682	5-6,702-699[AILt];x-x,696-695[BULt]	(((((((((((((..((....((((&))))--..))--)))))))))))))	GAUGGGGGAGACACUGGGAAUCGUG&CAUG--UGCC--UGUCUUCCCCAUC	3	0.191457
Potri.004G236000:miR6445a-Known-3p-star:1590	miR6445a-Known-3p-star	Potri.004G236000	1579	1598	1590	1590	10	-29.6	-19.6	0.662162	8	1-5,1598-1594;7-18,1593-1582	6-6,x-x[BULq];19-21,1581-1579[UP3]	...((((((((((((-(((((&))))).))))))))))))...	UGCUCAUUCCUUUCC-GGAAU&AUUUUAGGAAGGGAAUGAAUA	3	0.322687
Potri.004G236000:miR6445b-Known-3p-star:1590	miR6445b-Known-3p-star	Potri.004G236000	1579	1598	1590	1590	10	-29.6	-19.6	0.662162	8	1-5,1598-1594;7-18,1593-1582	6-6,x-x[BULq];19-21,1581-1579[UP3]	...((((((((((((-(((((&))))).))))))))))))...	UGCUCAUUCCUUUCC-GGAAU&AUUUUAGGAAGGGAAUGAAUA	3	0.322687
Potri.005G076200:miR476-Known-5p-star:3439	miR476-Known-5p-star	Potri.005G076200	3426	3448	3439	3439	10	-30.8	-22.18	0.72013	7.5	1-13,3448-3436;16-19,3431-3428	14-15,3435-3432[AILt];20-21,3427-3426[UP3]	..((((....(((((((((((((&)))))))))))))--..))))..	CAUUGCUAGUGGAAGGAUUGCUA&UAGUAAUCCUUCU--UUGCAAAG	3	0.272966
Potri.005G120700:miR6445a-Known-5p-mature:1109	miR6445a-Known-5p-mature	Potri.005G120700	1098	1119	1110	1109	11	-34.4	-22.8	0.662791	10	2-15,1118-1105	1-1,1119-1119[UP5];16-22,1104-1098[UP3]	.......((((((((((((((.&.)))))))))))))).......	GAUGGAGAGGAAGAGGGAUGGC&UUCAUUCCUCUUCCUAAAAUGG	3	0.162305
Potri.005G120700:miR6445b-Known-5p-mature:1109	miR6445b-Known-5p-mature	Potri.005G120700	1098	1119	1110	1109	11	-34.4	-22.8	0.662791	10	2-15,1118-1105	1-1,1119-1119[UP5];16-22,1104-1098[UP3]	.......((((((((((((((.&.)))))))))))))).......	GAUGGAGAGGAAGAGGGAUGGC&UUCAUUCCUCUUCCUAAAAUGG	3	0.162305
Potri.006G109900:miR167c-Probable-3p-star:1392	miR167c-Probable-3p-star	Potri.006G109900	1381	1401	1392	1392	10	-32.3	-21.7	0.671827	9	4-11,1398-1391;12-20,1389-1381	1-3,1401-1399[UP5];x-x,1390-1390[BULt]	(((((((((.((((((((...&...))))))))-)))))))))	GAUGGGACUGACUACAUGGAU&GAUCAUGUGGU-AGUUUCAUC	3	0.272966
Potri.006G132450:miR477c-Known-3p-mature:105	miR477c-Known-3p-mature	Potri.006G132450	86	114	105	105	10	-47.8	-33.7	0.705021	18	1-11,114-104;12-20,96-88;22-22,86-86	x-x,103-97[BULt];21-21,87-87[SIL]	(.(((((((((.......(((((((((((&)))))))))))-------))))))))).)	UGGCUCUCCCCGAUGUCAUGAAGGCCUCA&UGAGGCCUUUG-------GGGGAGAGUGG	3	0.0348002
Potri.007G046700:miR399a-Probable-5p-star:2090	miR399a-Probable-5p-star	Potri.007G046700	2076	2101	2089	2090	9	-41.9	-27.5	0.656325	16.5	1-7,2101-2095;11-20,2088-2079	8-10,2094-2089[AILt];21-23,2078-2076[UP3]	...((((((((((......(((((((&)))))))---...))))))))))...	AAGGCUAAAGGAGUUGUUGGAAGCCC&GGGCUUU---AUCCUCCUUUGGCAAA	3	0.132102
Potri.008G035200:miR530-Known-3p-star:119	miR530-Known-3p-star	Potri.008G035200	109	129	120	119	11	-46.4	-31.7	0.68319	7	2-6,128-124;8-12,122-118;14-18,116-112;20-21,110-109	1-1,129-129[UP5];7-7,123-123[SIL];13-13,117-117[SIL];19-19,111-111[SIL]	((.(((((.(((((.(((((.&.))))).))))).))))).))	CCCGCACCAGCGCCAGCGCCA&AGGUGCAGGUGCAGGUGCAGG	3	0.132102
Potri.008G038200:miR477a-Known-5p-mature:1850	miR477a-Known-5p-mature	Potri.008G038200	1841	1860	1851	1850	11	-41.2	-27.2	0.660194	5	2-4,1859-1857;6-16,1855-1845;18-21,1844-1841	1-1,1860-1860[UP5];5-5,1856-1856[SIL];17-17,x-x[BULq]	((((-(((((((((((.(((.&.))).))))))))))).))))	UUGG-AGCCUUUGAGGAAGAA&AUCUCCCUCAGAGGCUUCCAA	3	0.246752
Potri.008G038200:miR477b-Probable-5p-mature:1850	miR477b-Probable-5p-mature	Potri.008G038200	1841	1860	1851	1850	11	-41.2	-27.2	0.660194	5	2-4,1859-1857;6-16,1855-1845;18-21,1844-1841	1-1,1860-1860[UP5];5-5,1856-1856[SIL];17-17,x-x[BULq]	((((-(((((((((((.(((.&.))).))))))))))).))))	UUGG-AGCCUUUGAGGAAGAA&AUCUCCCUCAGAGGCUUCCAA	3	0.246752
Potri.008G085400:miR482b-Known-5p-star:396	miR482b-Known-5p-star	Potri.008G085400	383	403	395	396	9	-43.9	-29	0.660592	9.5	3-8,401-396;10-21,395-384	1-2,403-402[UP5];9-9,x-x[BULq];22-22,383-383[UP3]	.((((((((((((-((((((..&..)))))).)))))))))))).	AGGGUGGGGGGAG-AGGUAGAG&UCUUGCCUACUCCUCCCAUUCC	3	0.219594
Potri.008G085400:miR530-Known-5p-mature:917	miR530-Known-5p-mature	Potri.008G085400	903	930	918	917	11	-38	-24.72	0.650526	16	1-5,930-926;8-13,920-915;14-20,910-904	6-7,925-921[AILt];x-x,914-911[BULt];21-21,903-903[UP3]	.(((((((....((((((.....(((((&)))))---..))))))----))))))).	AAAGGUGCUUCCAGGUGCUGGACGUGCA&UGCAU---UUGCACCU----GCACCUUA	3	0.10081
Potri.008G105100:miRN8-Novel-3p-mature:1507	miRN8-Novel-3p-mature	Potri.008G105100	1487	1516	1507	1507	10	-32.2	-21.5	0.667702	22	1-10,1516-1507;11-20,1497-1488	x-x,1506-1498[BULt];21-21,1487-1487[UP3]	.((((((((((.........((((((((((&))))))))))---------)))))))))).	UGUGGGAGGACUUGACAAUUGGAGAGCAAA&UUUGCUCUUC---------GUUUUCUCAUG	3	0.629078
Potri.008G106400:miR6445a-Known-5p-mature:1476	miR6445a-Known-5p-mature	Potri.008G106400	1464	1485	1476	1476	10	-34.4	-23.96	0.696512	8.5	3-15,1483-1471;20-22,1466-1464	1-2,1485-1484[UP5];16-19,1470-1467[SIL]	(((....(((((((((((((..&..)))))))))))))....)))	CCGGGACAGGGAGAGGAAUGUU&UUCAUUCCUCUUCCUAAAAUGG	3	0.0683894
Potri.008G106400:miR6445b-Known-5p-mature:1476	miR6445b-Known-5p-mature	Potri.008G106400	1464	1485	1476	1476	10	-34.4	-23.96	0.696512	8.5	3-15,1483-1471;20-22,1466-1464	1-2,1485-1484[UP5];16-19,1470-1467[SIL]	(((....(((((((((((((..&..)))))))))))))....)))	CCGGGACAGGGAGAGGAAUGUU&UUCAUUCCUCUUCCUAAAAUGG	3	0.0683894
Potri.008G106400:miRN8-Novel-3p-mature:907	miRN8-Novel-3p-mature	Potri.008G106400	896	916	907	907	10	-32.2	-21.8	0.677019	10.5	4-17,913-900	1-3,916-914[UP5];18-21,899-896[UP3]	....((((((((((((((...&...))))))))))))))....	ACUUGGGAGACGAAGAGCUAU&UUUGCUCUUCGUUUUCUCAUG	3	0.489816
Potri.008G159500:miR475a-Probable-3p-star:1411	miR475a-Probable-3p-star	Potri.008G159500	1395	1420	1411	1411	10	-35.9	-25.3	0.704735	14.5	1-11,1420-1410;12-19,1404-1397	x-x,1409-1405[BULt];20-21,1396-1395[UP3]	..((((((((.....(((((((((((&)))))))))))-----))))))))..	UAAAUGGGCUGAGCGCUGUGAGGGUG&CACUCUUACAG-----AGUCCAUUGA	3	0.10081
Potri.008G221200:miR169a-Probable-3p-star:232	miR169a-Probable-3p-star	Potri.008G221200	220	241	232	232	10	-37.6	-24.8	0.659574	6.5	1-14,241-228;16-19,225-222	15-15,227-226[AILt];20-21,221-220[UP3]	..((((..((((((((((((((&))))))))))))))-.))))..	UUUAGGCUCCAGGAGCAACCUG&CAGGUUGUUCUUGG-CUCUACU	3	0.219594
Potri.009G015400:miR160f-Probable-3p-star:101	miR160f-Probable-3p-star	Potri.009G015400	92	109	100	101	9	-44.3	-29.3	0.6614	5.5	1-13,109-97;17-20,96-93	14-16,x-x[BULq];21-21,92-92[UP3]	.((((---(((((((((((((&)))))))))))))...)))).	GCUGC---GCUCCUCUCAUGC&GCAUGAGGGGAGUCAUGCAGG	3	0.132102
Potri.010G038400:miR396e-Probable-5p-mature:300	miR396e-Probable-5p-mature	Potri.010G038400	291	309	300	300	10	-34.9	-22.8	0.653295	7.5	3-11,307-299;13-17,298-294;19-20,293-292	1-2,309-308[UP5];12-12,x-x[BULq];18-18,x-x[BULq];21-21,291-291[UP3]	.((-(((((-(((((((((..&..))))))))).))))).)).	CGG-UCAAG-AAGCCGUGGCC&UUCCACGGCUUUCUUGAACUU	3	0.369008
Potri.010G054300:miR166k-Known-3p-mature:216	miR166k-Known-3p-mature	Potri.010G054300	205	229	216	216	10	-42	-28.9	0.688095	14	1-6,229-224;8-9,223-222;10-21,216-205	7-7,x-x[BULq];x-x,221-217[BULt]	((((((((((((.....((-((((((&)))))).))-----))))))))))))	GGAAUGAAGCCUACCCAGG-CUGGGA&UCUCGGACC-----AGGCUUCAUUCC	3	0.0683894
Potri.010G054300:miR166p-Known-3p-mature:216	miR166p-Known-3p-mature	Potri.010G054300	205	229	216	216	10	-42	-28.9	0.688095	14	1-6,229-224;8-9,223-222;10-21,216-205	7-7,x-x[BULq];x-x,221-217[BULt]	((((((((((((.....((-((((((&)))))).))-----))))))))))))	GGAAUGAAGCCUACCCAGG-CUGGGA&UCUCGGACC-----AGGCUUCAUUCC	3	0.0683894
Potri.010G102900:miR160a-Probable-5p-mature:2790	miR160a-Probable-5p-mature	Potri.010G102900	2779	2799	2790	2790	10	-45.4	-31.7	0.698238	5	1-10,2799-2790;12-15,2788-2785;17-20,2783-2780	11-11,2789-2789[SIL];16-16,2784-2784[SIL];21-21,2779-2779[UP3]	.((((.((((.((((((((((&)))))))))).)))).)))).	CGGCAGAUGGAGAGCCAGGCA&UGCCUGGCUCCCUGUAUGCCA	3	0.0683894
Potri.010G102900:miR160b-Probable-5p-mature:2790	miR160b-Probable-5p-mature	Potri.010G102900	2779	2799	2790	2790	10	-45.2	-31.32	0.69292	7	1-10,2799-2790;11-12,2788-2787;17-20,2783-2780	x-x,2789-2789[BULt];13-16,2786-2784[AILq];21-21,2779-2779[UP3]	.((((...-((.((((((((((&))))))))))-))....)))).	CGGCAGAU-GGAGAGCCAGGCA&UGCCUGGCUC-CCUGAAUGCCA	3	0.0683894
Potri.010G102900:miR160c-Probable-5p-mature:2790	miR160c-Probable-5p-mature	Potri.010G102900	2779	2799	2790	2790	10	-45.4	-31.7	0.698238	5	1-10,2799-2790;12-15,2788-2785;17-20,2783-2780	11-11,2789-2789[SIL];16-16,2784-2784[SIL];21-21,2779-2779[UP3]	.((((.((((.((((((((((&)))))))))).)))).)))).	CGGCAGAUGGAGAGCCAGGCA&UGCCUGGCUCCCUGUAUGCCA	3	0.0683894
Potri.010G102900:miR160d-Probable-5p-mature:2790	miR160d-Probable-5p-mature	Potri.010G102900	2779	2799	2790	2790	10	-45.4	-31.7	0.698238	5	1-10,2799-2790;12-15,2788-2785;17-20,2783-2780	11-11,2789-2789[SIL];16-16,2784-2784[SIL];21-21,2779-2779[UP3]	.((((.((((.((((((((((&)))))))))).)))).)))).	CGGCAGAUGGAGAGCCAGGCA&UGCCUGGCUCCCUGUAUGCCA	3	0.0683894
Potri.010G102900:miR160e-Probable-5p-mature:2790	miR160e-Probable-5p-mature	Potri.010G102900	2779	2799	2790	2790	10	-45.4	-31.7	0.698238	5	1-10,2799-2790;12-15,2788-2785;17-20,2783-2780	11-11,2789-2789[SIL];16-16,2784-2784[SIL];21-21,2779-2779[UP3]	.((((.((((.((((((((((&)))))))))).)))).)))).	CGGCAGAUGGAGAGCCAGGCA&UGCCUGGCUCCCUGUAUGCCA	3	0.0683894
Potri.010G102900:miR160f-Probable-5p-mature:2790	miR160f-Probable-5p-mature	Potri.010G102900	2779	2799	2790	2790	10	-45.2	-31.32	0.69292	7	1-10,2799-2790;11-12,2788-2787;17-20,2783-2780	x-x,2789-2789[BULt];13-16,2786-2784[AILq];21-21,2779-2779[UP3]	.((((...-((.((((((((((&))))))))))-))....)))).	CGGCAGAU-GGAGAGCCAGGCA&UGCCUGGCUC-CCUGAAUGCCA	3	0.0683894
Potri.010G163200:miR6427-Known-3p-star:1686	miR6427-Known-3p-star	Potri.010G163200	1675	1693	1685	1686	9	-33.8	-22.9	0.677515	5	1-9,1693-1685;12-15,1684-1681;17-21,1679-1675	10-11,x-x[BULq];16-16,1680-1680[SIL]	(((((.((((--(((((((((&)))))))))..)))).)))))	UCUCACAAUG--CAUUCCCAC&GUGGGAAUGAACAUUAUGAGA	3	0.0348002
Potri.011G006800:miR6445a-Known-3p-star:297	miR6445a-Known-3p-star	Potri.011G006800	287	307	298	297	11	-29.6	-19.3	0.652027	10.5	3-16,305-292	1-2,307-306[UP5];17-21,291-287[UP3]	.....((((((((((((((..&..)))))))))))))).....	ACUGUGUUCCUUUCCUAGAGA&AUUUUAGGAAGGGAAUGAAUA	3	0.346258
Potri.011G006800:miR6445b-Known-3p-star:297	miR6445b-Known-3p-star	Potri.011G006800	287	307	298	297	11	-29.6	-19.3	0.652027	10.5	3-16,305-292	1-2,307-306[UP5];17-21,291-287[UP3]	.....((((((((((((((..&..)))))))))))))).....	ACUGUGUUCCUUUCCUAGAGA&AUUUUAGGAAGGGAAUGAAUA	3	0.346258
Potri.011G042500:miR169b-Probable-3p-star:1315	miR169b-Probable-3p-star	Potri.011G042500	1305	1326	1315	1315	10	-38.8	-27.7	0.713918	8	2-4,1325-1323;5-20,1320-1305	1-1,1326-1326[UP5];x-x,1322-1321[BULt]	((((((((((((((((..(((.&.)))--))))))))))))))))	GAUGGCUAAAGGGGAUGUUGCA&GGCA--GUCUCCUUUGGCUAUC	3	0.0348002
Potri.012G005500:miR169b-Probable-3p-star:928	miR169b-Probable-3p-star	Potri.012G005500	918	936	928	928	10	-38.8	-26	0.670103	6	1-6,936-931;8-17,930-921	7-7,x-x[BULq];18-20,920-918[UP3]	...((((((((((-((((((&)))))).))))))))))...	AACAGCCAAAGGA-AUUGCC&GGCAGUCUCCUUUGGCUAUC	3	0.219594
Potri.013G003200:miR396d-Probable-5p-mature:1870	miR396d-Probable-5p-mature	Potri.013G003200	1858	1879	1869	1870	9	-34.9	-23.7	0.679083	8.5	1-4,1879-1876;5-18,1874-1861	x-x,1875-1875[BULt];19-21,1860-1858[UP3]	...((((((((((((((.((((&))))-))))))))))))))...	AACUCAAGAGGGUCGUGUGAAG&UUUC-CACGGCUUUCUUGAACU	3	0.162305
Potri.013G039700:miR399a-Probable-5p-star:1348	miR399a-Probable-5p-star	Potri.013G039700	1335	1356	1348	1348	10	-41.9	-32.62	0.77852	10	1-4,1356-1353;9-22,1349-1336	5-8,1352-1350[AILq];23-23,1335-1335[UP3]	.((((((((((((((...-((((&))))....)))))))))))))).	CUUGCCAGAGGAGGAGAU-GCCU&GGGCUUUAUCCUCCUUUGGCAAA	3	0.0348002
Potri.013G099700:miR6421-Probable-5p-star:471	miR6421-Probable-5p-star	Potri.013G099700	460	486	471	471	10	-33.8	-25.1	0.742604	14	1-6,486-481;7-9,479-477;10-21,471-460	x-x,480-480[BULt];x-x,476-472[BULt]	((((((((((((.....(((.((((((&))))))-)))-----))))))))))))	GAGAGAGUGGGUGUGCCUGUCAAGGGA&UCCCUU-ACA-----AUCUACUCUUUC	3	0.0348002
Potri.014G030200:miR6457a-Probable-3p-star:120	miR6457a-Probable-3p-star	Potri.014G030200	112	130	120	120	10	-33	-25.3	0.766667	6	1-8,130-123;9-16,121-114	x-x,122-122[BULt];17-18,113-112[UP3]	..((((((((.((((((((&))))))))-))))))))..	GAUGGUCUCCUCAGCAGGG&CUCUGCUG-GGAGAUUAGA	3	0.0348002
Potri.015G056000:miR167e-Probable-3p-star:1673	miR167e-Probable-3p-star	Potri.015G056000	1663	1681	1672	1673	9	-34.3	-22.4	0.653061	7	1-5,1681-1677;7-9,1675-1673;11-15,1671-1667;17-20,1666-1663	6-6,1676-1676[SIL];10-10,1672-1672[SIL];16-16,x-x[BULq]	((((-(((((.(((.(((((&))))).))).))))).))))	GGUG-AACUGGCACUUGGUC&GAUCAUGUGGUAGUUUCACC	3	0.219594
Potri.015G071200:miR1446b-Probable-5p-mature:1106	miR1446b-Probable-5p-mature	Potri.015G071200	1095	1117	1107	1106	11	-38.3	-27.9	0.72846	7.5	1-4,1117-1114;7-13,1110-1104;14-21,1102-1095	5-6,1113-1111[AILt];x-x,1103-1103[BULt]	((((((((.(((((((...((((&))))-..)))))))-))))))))	GUUGAGGGCAGAGAGUGAGAGAG&UUCU-GAACUCUCU-CCCUCAAC	3	0.0348002
Potri.015G071200:miR1446c-Probable-5p-mature:1106	miR1446c-Probable-5p-mature	Potri.015G071200	1095	1117	1107	1106	11	-38.3	-27.9	0.72846	7.5	1-4,1117-1114;7-13,1110-1104;14-21,1102-1095	5-6,1113-1111[AILt];x-x,1103-1103[BULt]	((((((((.(((((((...((((&))))-..)))))))-))))))))	GUUGAGGGCAGAGAGUGAGAGAG&UUCU-GAACUCUCU-CCCUCAAC	3	0.0348002
Potri.015G071200:miRN8-Novel-5p-star:842	miRN8-Novel-5p-star	Potri.015G071200	830	851	841	842	9	-32.2	-24.3	0.754658	8.5	4-7,848-845;8-21,843-830	1-3,851-849[UP5];x-x,844-844[BULt]	((((((((((((((.((((...&...))))-))))))))))))))	UCUCUGCUCUUCGUACUUUAUU&UGAAAAG-AUGAAGAGUAGAGA	3	0.0348002
Potri.015G071700:miR319a-Known-3p-mature:210	miR319a-Known-3p-mature	Potri.015G071700	200	222	210	210	10	-41.6	-27.54	0.662019	11	2-6,221-217;8-11,212-209;13-20,207-200	1-1,222-222[UP5];7-7,216-213[AILt];12-12,208-208[SIL]	((((((((.((((....(((((.&.)))))---.)))).))))))))	GGGAGCUCACUUCCGUUGUCCAG&UUGGAC---UGAAGGGAGCUCCC	3	0.132102
Potri.015G071700:miR319b-Probable-3p-mature:210	miR319b-Probable-3p-mature	Potri.015G071700	200	222	210	210	10	-41.6	-27.54	0.662019	11	2-6,221-217;8-11,212-209;13-20,207-200	1-1,222-222[UP5];7-7,216-213[AILt];12-12,208-208[SIL]	((((((((.((((....(((((.&.)))))---.)))).))))))))	GGGAGCUCACUUCCGUUGUCCAG&UUGGAC---UGAAGGGAGCUCCC	3	0.132102
Potri.015G071700:miR319j-Probable-3p-mature:210	miR319j-Probable-3p-mature	Potri.015G071700	200	222	210	210	10	-41.6	-27.54	0.662019	11	2-6,221-217;8-11,212-209;13-20,207-200	1-1,222-222[UP5];7-7,216-213[AILt];12-12,208-208[SIL]	((((((((.((((....(((((.&.)))))---.)))).))))))))	GGGAGCUCACUUCCGUUGUCCAG&UUGGAC---UGAAGGGAGCUCCC	3	0.132102
Potri.015G103100:miR167b-Probable-5p-mature:2697	miR167b-Probable-5p-mature	Potri.015G103100	2683	2706	2697	2697	10	-38.9	-26.2	0.673522	11	1-11,2706-2696;12-17,2692-2687	x-x,2695-2693[BULt];18-21,2686-2683[UP3]	....((((((...(((((((((((&)))))))))))---))))))....	CAUCUCAUGUCUUUGGCAGCUUCA&UGAAGCUGCCA---GCAUGAUCUA	3	0.0683894
Potri.015G103100:miR167c-Probable-5p-mature:2697	miR167c-Probable-5p-mature	Potri.015G103100	2683	2706	2697	2697	10	-40.2	-26.3	0.654229	9	1-11,2706-2696;12-17,2692-2687;20-21,2684-2683	x-x,2695-2693[BULt];18-19,2686-2685[SIL]	((..((((((...(((((((((((&)))))))))))---))))))..))	CAUCUCAUGUCUUUGGCAGCUUCA&UGAAGCUGCCA---GCAUGAUCUG	3	0.0683894
Potri.015G103100:miR167d-Probable-5p-mature:2697	miR167d-Probable-5p-mature	Potri.015G103100	2683	2706	2697	2697	10	-38.9	-26.2	0.673522	11	1-11,2706-2696;12-17,2692-2687	x-x,2695-2693[BULt];18-21,2686-2683[UP3]	....((((((...(((((((((((&)))))))))))---))))))....	CAUCUCAUGUCUUUGGCAGCUUCA&UGAAGCUGCCA---GCAUGAUCUA	3	0.0683894
Potri.015G103100:miR167e-Probable-5p-mature:2697	miR167e-Probable-5p-mature	Potri.015G103100	2683	2706	2697	2697	10	-38.9	-26.2	0.673522	11	1-11,2706-2696;12-17,2692-2687	x-x,2695-2693[BULt];18-21,2686-2683[UP3]	....((((((...(((((((((((&)))))))))))---))))))....	CAUCUCAUGUCUUUGGCAGCUUCA&UGAAGCUGCCA---GCAUGAUCUA	3	0.0683894
Potri.015G103100:miR167g-Known-5p-mature:2697	miR167g-Known-5p-mature	Potri.015G103100	2682	2706	2697	2697	10	-39.8	-26.2	0.658291	12	1-11,2706-2696;12-17,2692-2687	x-x,2695-2693[BULt];18-22,2686-2682[UP3]	.....((((((...(((((((((((&)))))))))))---)))))).....	CCAUCUCAUGUCUUUGGCAGCUUCA&UGAAGCUGCCA---GCAUGAUCUUA	3	0.0683894
Potri.015G103300:miR6478-Probable-3p-star:66	miR6478-Probable-3p-star	Potri.015G103300	57	76	67	66	11	-37.9	-26.2	0.691293	10.5	5-11,72-66;13-20,64-57	1-4,76-73[UP5];12-12,65-65[SIL]	((((((((.(((((((....&....))))))).))))))))	CUCCGACCGUGACCGGAGCU&CAAGCUGGUCAAGGUUGGAG	3	0.0683894
Potri.016G061100:miR476-Known-5p-star:65	miR476-Known-5p-star	Potri.016G061100	54	74	65	65	10	-30.8	-20.7	0.672078	6	3-15,72-60;18-21,57-54	1-2,74-73[UP5];16-17,59-58[SIL]	((((..(((((((((((((..&..)))))))))))))..))))	CUUUAGAAAGAAGGGUUACAU&UAGUAAUCCUUCUUUGCAAAG	3	0.390967
Potri.017G058200:miR477a-Known-5p-mature:725	miR477a-Known-5p-mature	Potri.017G058200	714	735	725	725	10	-41.2	-27	0.65534	10	4-8,732-728;9-13,726-722;15-19,720-716	1-3,735-733[UP5];x-x,727-727[BULt];14-14,721-721[SIL];20-21,715-714[UP3]	..(((((.(((((.(((((...&...)))))-))))).)))))..	GAGGAAGGCUCUGAAGGGACUA&AUCUCCCU-CAGAGGCUUCCAA	3	0.298267
Potri.017G058200:miR477b-Probable-5p-mature:725	miR477b-Probable-5p-mature	Potri.017G058200	714	735	725	725	10	-41.2	-27	0.65534	10	4-8,732-728;9-13,726-722;15-19,720-716	1-3,735-733[UP5];x-x,727-727[BULt];14-14,721-721[SIL];20-21,715-714[UP3]	..(((((.(((((.(((((...&...)))))-))))).)))))..	GAGGAAGGCUCUGAAGGGACUA&AUCUCCCU-CAGAGGCUUCCAA	3	0.298267
Potri.017G069100:miR395b-Probable-5p-star:494	miR395b-Probable-5p-star	Potri.017G069100	483	503	494	494	10	-37.2	-25.9	0.696237	9.5	3-17,501-487	1-2,503-502[UP5];18-21,486-483[UP3]	....(((((((((((((((..&..)))))))))))))))....	GAACGAGGUGCUUGGAGGAUA&GUUCCUCUGAGCACUUCAUUG	3	0.0683894
Potri.017G069100:miR395c-Probable-5p-star:494	miR395c-Probable-5p-star	Potri.017G069100	483	503	494	494	10	-39.5	-25.9	0.655696	9.5	3-17,501-487	1-2,503-502[UP5];18-21,486-483[UP3]	....(((((((((((((((..&..)))))))))))))))....	GAACGAGGUGCUUGGAGGAUA&GUUCCUCUGAGCACUUCACUG	3	0.132102
Potri.017G069100:miR395e-Probable-5p-star:494	miR395e-Probable-5p-star	Potri.017G069100	483	503	494	494	10	-37.2	-25.9	0.696237	9.5	3-17,501-487	1-2,503-502[UP5];18-21,486-483[UP3]	....(((((((((((((((..&..)))))))))))))))....	GAACGAGGUGCUUGGAGGAUA&GUUCCUCUGAGCACUUCAUUG	3	0.0683894
Potri.017G069100:miR395f-Known-5p-star:494	miR395f-Known-5p-star	Potri.017G069100	483	503	494	494	10	-37.2	-25.9	0.696237	9.5	3-17,501-487	1-2,503-502[UP5];18-21,486-483[UP3]	....(((((((((((((((..&..)))))))))))))))....	GAACGAGGUGCUUGGAGGAUA&GUUCCUCUGAGCACUUCAAUG	3	0.0348002
Potri.017G081500:miR319a-Known-3p-mature:312	miR319a-Known-3p-mature	Potri.017G081500	303	321	313	312	11	-41.6	-28.3	0.680288	5	1-4,321-318;6-15,317-308;17-20,306-303	5-5,x-x[BULq];16-16,307-307[SIL]	((((.((((((((((-((((&)))).)))))))))).))))	GGGAAUUCCCUUCGG-CCAG&UUGGACUGAAGGGAGCUCCC	3	0.0683894
Potri.017G081500:miR319b-Probable-3p-mature:312	miR319b-Probable-3p-mature	Potri.017G081500	303	321	313	312	11	-41.6	-28.3	0.680288	5	1-4,321-318;6-15,317-308;17-20,306-303	5-5,x-x[BULq];16-16,307-307[SIL]	((((.((((((((((-((((&)))).)))))))))).))))	GGGAAUUCCCUUCGG-CCAG&UUGGACUGAAGGGAGCUCCC	3	0.0683894
Potri.017G081500:miR319c-Probable-3p-mature:312	miR319c-Probable-3p-mature	Potri.017G081500	302	322	313	312	11	-45.3	-31.1	0.686534	8.5	4-15,319-308;17-20,306-303	1-3,322-320[UP5];16-16,307-307[SIL];21-21,302-302[UP3]	.((((.((((((((((((...&...)))))))))))).)))).	CGGGAAUUCCCUUCGGCCAGU&UUGGGCUGAAGGGAGCUCCCA	3	0.0348002
Potri.017G081500:miR319j-Probable-3p-mature:312	miR319j-Probable-3p-mature	Potri.017G081500	303	321	313	312	11	-41.6	-28.3	0.680288	5	1-4,321-318;6-15,317-308;17-20,306-303	5-5,x-x[BULq];16-16,307-307[SIL]	((((.((((((((((-((((&)))).)))))))))).))))	GGGAAUUCCCUUCGG-CCAG&UUGGACUGAAGGGAGCUCCC	3	0.0683894
Potri.018G006000:miR6445a-Known-3p-star:1207	miR6445a-Known-3p-star	Potri.018G006000	1197	1217	1208	1207	11	-29.6	-22.1	0.746622	11	6-20,1212-1198	1-5,1217-1213[UP5];21-21,1197-1197[UP3]	.(((((((((((((((.....&.....))))))))))))))).	AGUUCAUUUCCUUCCUUUCAA&AUUUUAGGAAGGGAAUGAAUA	3	0.0348002
Potri.018G006000:miR6445b-Known-3p-star:1207	miR6445b-Known-3p-star	Potri.018G006000	1197	1217	1208	1207	11	-29.6	-22.1	0.746622	11	6-20,1212-1198	1-5,1217-1213[UP5];21-21,1197-1197[UP3]	.(((((((((((((((.....&.....))))))))))))))).	AGUUCAUUUCCUUCCUUUCAA&AUUUUAGGAAGGGAAUGAAUA	3	0.0348002
Potri.018G104500:miR319b-Probable-5p-star:168	miR319b-Probable-5p-star	Potri.018G104500	159	177	168	168	10	-33.2	-21.8	0.656627	6	1-15,177-163;17-20,162-159	16-16,x-x[BULq]	((((-(((((((((((((((&))))))))))))))).))))	GGGU-GAUCGGAGAAGGCUU&GAGCUUUUUUCGGUCCACUU	3	0.471421
Potri.019G024200:miR319b-Probable-5p-star:1991	miR319b-Probable-5p-star	Potri.019G024200	1982	2001	1992	1991	11	-33.2	-22.1	0.665663	7.5	1-13,2001-1989;15-18,1987-1984	14-14,1988-1988[SIL];19-20,1983-1982[UP3]	..((((.(((((((((((((&))))))))))))).))))..	AUGUGGUUUGGAAGAGGCUC&GAGCUUUUUUCGGUCCACUU	3	0.390967
Potri.019G024200:miR482b-Known-3p-mature:7738	miR482b-Known-3p-mature	Potri.019G024200	7727	7747	7738	7738	10	-38.6	-26.5	0.686528	9.5	3-9,7745-7739;12-13,7736-7735;15-21,7733-7727	1-2,7747-7746[UP5];10-11,7738-7737[SIL];14-14,7734-7734[SIL]	(((((((.((..(((((((..&..)))))))..)).)))))))	GUGCUGUGCAUGCCUUCCAGA&UAUGGGAGGAUUGGACAGUAC	3	0.132102
Potri.019G024200:miR6445a-Known-5p-mature:4749	miR6445a-Known-5p-mature	Potri.019G024200	4737	4758	4749	4749	10	-34.4	-23.7	0.688953	10	3-17,4756-4742	1-2,4758-4757[UP5];18-22,4741-4737[UP3]	.....(((((((((((((((..&..))))))))))))))).....	GGGUCUUAGGGAGAGGAGUGCU&UUCAUUCCUCUUCCUAAAAUGG	3	0.10081
Potri.019G024200:miR6445b-Known-5p-mature:4749	miR6445b-Known-5p-mature	Potri.019G024200	4737	4758	4749	4749	10	-34.4	-23.7	0.688953	10	3-17,4756-4742	1-2,4758-4757[UP5];18-22,4741-4737[UP3]	.....(((((((((((((((..&..))))))))))))))).....	GGGUCUUAGGGAGAGGAGUGCU&UUCAUUCCUCUUCCUAAAAUGG	3	0.10081
Potri.019G051300:miR172c-Probable-5p-star:696	miR172c-Probable-5p-star	Potri.019G051300	686	704	695	696	9	-31.8	-20.8	0.654088	5.5	1-8,704-697;10-13,695-692;15-15,690-690;17-18,688-687	9-9,696-696[SIL];14-14,691-691[SIL];16-16,689-689[SIL];19-19,686-686[UP3]	.((.(.((((.((((((((&)))))))).)))).).)).	AGGUUGUUGAAGAUGCUCC&GGAGCAUCAUCAAGAUUCA	3	0.191457
Potri.001G031400:miR164c-Known-3p-star:2243	miR164c-Known-3p-star	Potri.001G031400	2233	2254	2244	2243	11	-43.1	-29.1	0.675174	8.5	1-6,2254-2249;8-18,2246-2236	7-7,2248-2247[AILt];19-21,2235-2233[UP3]	...(((((((((((..((((((&))))))-.)))))))))))...	GGAGGAGGAGGGGAAACAUGUG&CACGUG-CUCCCCUUCUCCAAC	4	0.157068
Potri.001G031400:miR164d-Probable-3p-star:2243	miR164d-Probable-3p-star	Potri.001G031400	2233	2254	2244	2243	11	-45.5	-32	0.703297	8	1-6,2254-2249;8-18,2246-2236	7-7,2248-2247[AILt];19-21,2235-2233[UP3]	...(((((((((((..((((((&))))))-.)))))))))))...	GGAGGAGGAGGGGAAACAUGUG&CACGUG-CUCCCCUCCUCCAAC	4	0.12028
Potri.001G031400:miR396c-Probable-3p-star:1811	miR396c-Probable-3p-star	Potri.001G031400	1800	1817	1810	1811	9	-38.2	-24.96	0.653403	11	1-5,1817-1813;11-19,1809-1801	6-10,1812-1810[AILq];20-20,1800-1800[UP3]	.(((((((((...--(((((&))))).....))))))))).	CCUCCCACGGGAG--UUGAG&CUCAAGAAAGCCGUGGGAGA	4	0.0818865
Potri.001G079800:miR160a-Probable-5p-mature:393	miR160a-Probable-5p-mature	Potri.001G079800	382	404	394	393	11	-45.4	-31.9	0.702643	8	2-8,403-397;9-16,395-388;17-20,386-383	1-1,404-404[UP5];x-x,396-396[BULt];x-x,387-387[BULt];21-21,382-382[UP3]	.((((.((((((((.(((((((.&.)))))))-))))))))-)))).	AGGCAUUACAGGGGUGUUAGGCG&UGCCUGGC-UCCCUGUA-UGCCA	4	0.0418176
Potri.001G079800:miR160b-Probable-5p-mature:393	miR160b-Probable-5p-mature	Potri.001G079800	382	404	394	393	11	-45.2	-31.7	0.701327	8	2-8,403-397;9-14,395-390;15-20,388-383	1-1,404-404[UP5];x-x,396-396[BULt];x-x,389-389[BULt];21-21,382-382[UP3]	.((((((.((((((.(((((((.&.)))))))-))))))-)))))).	AGGCAUUACAGGGGUGUUAGGCG&UGCCUGGC-UCCCUG-AAUGCCA	4	0.0418176
Potri.001G079800:miR160c-Probable-5p-mature:393	miR160c-Probable-5p-mature	Potri.001G079800	382	404	394	393	11	-45.4	-31.9	0.702643	8	2-8,403-397;9-16,395-388;17-20,386-383	1-1,404-404[UP5];x-x,396-396[BULt];x-x,387-387[BULt];21-21,382-382[UP3]	.((((.((((((((.(((((((.&.)))))))-))))))))-)))).	AGGCAUUACAGGGGUGUUAGGCG&UGCCUGGC-UCCCUGUA-UGCCA	4	0.0418176
Potri.001G079800:miR160d-Probable-5p-mature:393	miR160d-Probable-5p-mature	Potri.001G079800	382	404	394	393	11	-45.4	-31.9	0.702643	8	2-8,403-397;9-16,395-388;17-20,386-383	1-1,404-404[UP5];x-x,396-396[BULt];x-x,387-387[BULt];21-21,382-382[UP3]	.((((.((((((((.(((((((.&.)))))))-))))))))-)))).	AGGCAUUACAGGGGUGUUAGGCG&UGCCUGGC-UCCCUGUA-UGCCA	4	0.0418176
Potri.001G079800:miR160e-Probable-5p-mature:393	miR160e-Probable-5p-mature	Potri.001G079800	382	404	394	393	11	-45.4	-31.9	0.702643	8	2-8,403-397;9-16,395-388;17-20,386-383	1-1,404-404[UP5];x-x,396-396[BULt];x-x,387-387[BULt];21-21,382-382[UP3]	.((((.((((((((.(((((((.&.)))))))-))))))))-)))).	AGGCAUUACAGGGGUGUUAGGCG&UGCCUGGC-UCCCUGUA-UGCCA	4	0.0418176
Potri.001G079800:miR160f-Probable-5p-mature:393	miR160f-Probable-5p-mature	Potri.001G079800	382	404	394	393	11	-45.2	-31.7	0.701327	8	2-8,403-397;9-14,395-390;15-20,388-383	1-1,404-404[UP5];x-x,396-396[BULt];x-x,389-389[BULt];21-21,382-382[UP3]	.((((((.((((((.(((((((.&.)))))))-))))))-)))))).	AGGCAUUACAGGGGUGUUAGGCG&UGCCUGGC-UCCCUG-AAUGCCA	4	0.0418176
Potri.001G144500:miR472b-Known-3p-mature:709	miR472b-Known-3p-mature	Potri.001G144500	695	718	709	709	10	-43.3	-28.3	0.65358	13	4-10,715-709;11-17,705-699;19-21,698-696	1-3,718-716[UP5];x-x,708-706[BULt];18-18,x-x[BULq];22-22,695-695[UP3]	.(((-(((((((...(((((((...&...)))))))---))))))).))).	AGGA-GGGUGGAGAGGUUGGGAUAA&UUUUCCCAAC---UCCACCCAUCCC	4	0.319178
Potri.001G345300:miRN8-Novel-3p-mature:5431	miRN8-Novel-3p-mature	Potri.001G345300	5419	5440	5431	5431	10	-32.2	-22.6	0.701863	6	3-10,5438-5431;12-16,5429-5425;17-21,5423-5419	1-2,5440-5439[UP5];11-11,5430-5430[SIL];x-x,5424-5424[BULt]	(((((.(((((.((((((((..&..)))))))).)))))-)))))	CAUGAUGAAAAAGAAGAGCAUG&UUUGCUCUUCGUUUUC-UCAUG	4	0.289465
Potri.001G420000:miR482b-Known-5p-star:553	miR482b-Known-5p-star	Potri.001G420000	541	562	553	553	10	-43.9	-33.8	0.769932	7	3-19,560-544;21-22,542-541	1-2,562-561[UP5];20-20,543-543[SIL]	((.(((((((((((((((((..&..))))))))))))))))).))	GGCAUGGGAGGGGUGGGUAAAA&UCUUGCCUACUCCUCCCAUUCC	4	0.0418176
Potri.001G450600:miR477c-Known-3p-mature:1545	miR477c-Known-3p-mature	Potri.001G450600	1534	1556	1546	1545	11	-47.8	-32.5	0.679916	9.5	4-5,1553-1552;6-22,1550-1534	1-3,1556-1554[UP5];x-x,1551-1551[BULt]	(((((((((((((((((.((...&...))-)))))))))))))))))	UCAUUCUCCUCCAGAGGACCAAG&UGAGG-CCUUUGGGGGAGAGUGG	4	0.0818865
Potri.002G107902:miR6478-Probable-3p-star:1955	miR6478-Probable-3p-star	Potri.002G107902	1946	1967	1956	1955	11	-37.9	-26.5	0.699208	10.5	3-6,1965-1962;7-16,1959-1950;18-20,1948-1946	1-2,1967-1966[UP5];x-x,1961-1960[BULt];17-17,1949-1949[SIL]	(((.((((((((((..((((..&..))))--)))))))))).)))	CUCGAGCCUUGGCCGAGGCUAG&CAAGCU--GGUCAAGGUUGGAG	4	0.0418176
Potri.002G125400:miR164a-Known-3p-star:1098	miR164a-Known-3p-star	Potri.002G125400	1088	1108	1099	1098	11	-40.1	-26.1	0.650873	8.5	1-3,1108-1106;5-6,1104-1103;8-18,1101-1091	4-4,1105-1105[SIL];7-7,1102-1102[SIL];19-21,1090-1088[UP3]	...(((((((((((.((.(((&))).)).)))))))))))...	UAAGGGGAAGGAGACCGGGUG&CACGCGCUCUUCUUCUCCAAC	4	0.319178
Potri.002G125400:miR168a-Known-3p-star:945	miR168a-Known-3p-star	Potri.002G125400	933	954	945	945	10	-39	-27.9	0.715385	7.5	2-15,953-940;16-18,938-936	1-1,954-954[UP5];x-x,939-939[BULt];19-21,935-933[UP3]	...(((.((((((((((((((.&.))))))))))))))-)))...	UAGCGGUUUGAUGCAGGGUGGA&CCCGCCUUGCAUCAA-CUGAAU	4	0.0418176
Potri.002G125400:miR168b-Known-3p-star:945	miR168b-Known-3p-star	Potri.002G125400	933	954	945	945	10	-39	-27.9	0.715385	7.5	2-15,953-940;16-18,938-936	1-1,954-954[UP5];x-x,939-939[BULt];19-21,935-933[UP3]	...(((.((((((((((((((.&.))))))))))))))-)))...	UAGCGGUUUGAUGCAGGGUGGA&CCCGCCUUGCAUCAA-CUGAAU	4	0.0418176
Potri.002G231700:miR167c-Probable-3p-star:764	miR167c-Probable-3p-star	Potri.002G231700	754	772	763	764	9	-32.3	-22.6	0.69969	5.5	1-2,772-771;4-17,769-756;19-20,755-754	3-3,770-770[SIL];18-18,x-x[BULq]	((-((((((((((((((.((&)).)))))))))))))).))	GA-GAAGCUGCUACAUGUUC&GAUCAUGUGGUAGUUUCAUC	4	0.12028
Potri.002G231700:miR167e-Probable-3p-star:764	miR167e-Probable-3p-star	Potri.002G231700	753	772	763	764	9	-34.3	-24.1	0.702624	5.5	1-2,772-771;4-17,769-756;19-20,754-753	3-3,770-770[SIL];18-18,755-755[SIL]	((.((((((((((((((.((&)).)))))))))))))).))	GGAGAAGCUGCUACAUGUUC&GAUCAUGUGGUAGUUUCACC	4	0.0818865
Potri.002G231700:miR167g-Known-3p-star:764	miR167g-Known-3p-star	Potri.002G231700	753	773	764	764	10	-37.9	-26.3	0.693931	5.5	2-3,772-771;5-18,769-756;20-21,754-753	1-1,773-773[UP5];4-4,770-770[SIL];19-19,755-755[SIL]	((.((((((((((((((.((.&.)).)))))))))))))).))	GGAGAAGCUGCUACAUGUUCC&AGAUCAUGUGGCAGUUUCACC	4	0.0818865
Potri.002G232600:miR167b-Probable-5p-mature:1757	miR167b-Probable-5p-mature	Potri.002G232600	1740	1767	1758	1757	11	-38.9	-25.8	0.663239	17	1-2,1767-1766;4-11,1764-1757;12-21,1749-1740	3-3,1765-1765[SIL];x-x,1756-1750[BULt]	((((((((((.......((((((((.((&)).))))))))-------))))))))))	UGGAUUAUGCCAGAAUUUGGCAGCUGCA&UGAAGCUGCCA-------GCAUGAUCUA	4	0.12028
Potri.002G232600:miR167d-Probable-5p-mature:1757	miR167d-Probable-5p-mature	Potri.002G232600	1740	1767	1758	1757	11	-38.9	-25.8	0.663239	17	1-2,1767-1766;4-11,1764-1757;12-21,1749-1740	3-3,1765-1765[SIL];x-x,1756-1750[BULt]	((((((((((.......((((((((.((&)).))))))))-------))))))))))	UGGAUUAUGCCAGAAUUUGGCAGCUGCA&UGAAGCUGCCA-------GCAUGAUCUA	4	0.12028
Potri.002G232600:miR167e-Probable-5p-mature:1757	miR167e-Probable-5p-mature	Potri.002G232600	1740	1767	1758	1757	11	-38.9	-25.8	0.663239	17	1-2,1767-1766;4-11,1764-1757;12-21,1749-1740	3-3,1765-1765[SIL];x-x,1756-1750[BULt]	((((((((((.......((((((((.((&)).))))))))-------))))))))))	UGGAUUAUGCCAGAAUUUGGCAGCUGCA&UGAAGCUGCCA-------GCAUGAUCUA	4	0.12028
Potri.002G251800:miR7817-Known-5p-mature:266	miR7817-Known-5p-mature	Potri.002G251800	256	276	267	266	11	-33.4	-22.4	0.670659	7	2-7,275-270;9-17,268-260;19-20,258-257	1-1,276-276[UP5];8-8,269-269[SIL];18-18,259-259[SIL];21-21,256-256[UP3]	.((.(((((((((.((((((.&.)))))).))))))))).)).	GGUAUCGAGACAGGGACCAAU&UUUGGUUAUUGUCUCGAGACA	4	0.157068
Potri.002G253600:miRN8-Novel-3p-mature:1508	miRN8-Novel-3p-mature	Potri.002G253600	1498	1519	1509	1508	11	-32.2	-21.9	0.680124	10	1-8,1519-1512;11-20,1508-1499	9-10,1511-1509[AILt];21-21,1498-1498[UP3]	.((((((((((...((((((((&))))))))-..)))))))))).	AAUGGGAGAGCUCUGGAGCAAA&UUUGCUCU-UCGUUUUCUCAUG	4	0.516252
Potri.003G019100:miR319d-Known-3p-mature:1377	miR319d-Known-3p-mature	Potri.003G019100	1368	1386	1378	1377	11	-35.2	-22.9	0.650568	8	1-6,1386-1381;9-20,1379-1368	7-8,1380-1380[AILq]	((((((((((((.-((((((&))))))..))))))))))))	GGAGCUUCCUUCC-UCUGGA&UUUGGAUUGAAGGGAGCUCU	4	0.401067
Potri.003G019100:miR319h-Known-3p-mature:1377	miR319h-Known-3p-mature	Potri.003G019100	1368	1386	1378	1377	11	-35.2	-22.9	0.650568	8	1-6,1386-1381;9-20,1379-1368	7-8,1380-1380[AILq]	((((((((((((.-((((((&))))))..))))))))))))	GGAGCUUCCUUCC-UCUGGA&UUUGGAUUGAAGGGAGCUCU	4	0.401067
Potri.003G172500:miR6478-Probable-3p-star:153	miR6478-Probable-3p-star	Potri.003G172500	142	161	152	153	9	-37.9	-25.7	0.6781	10	3-10,159-152;13-18,149-144	1-2,161-160[UP5];11-12,151-150[SIL];19-20,143-142[UP3]	..((((((..((((((((..&..))))))))..))))))..	ACCCAACCCAGGCCAGCUGA&CAAGCUGGUCAAGGUUGGAG	4	0.157068
Potri.004G171000:miR6457a-Probable-3p-star:691	miR6457a-Probable-3p-star	Potri.004G171000	682	700	690	691	9	-33	-21.5	0.651515	6.5	1-3,700-698;5-9,696-692;10-17,690-683	4-4,697-697[SIL];x-x,691-691[BULt];18-18,682-682[UP3]	.((((((((.(((((.(((&))).)))))-)))))))).	GUUGGUCUCACCAGCCGAG&CUCUGCUGG-GAGAUUAGA	4	0.401067
Potri.004G189700:miR530-Known-3p-star:2976	miR530-Known-3p-star	Potri.004G189700	2965	2985	2976	2976	10	-46.4	-33.5	0.721983	6	2-2,2984-2984;4-6,2982-2980;8-12,2978-2974;14-21,2972-2965	1-1,2985-2985[UP5];3-3,2983-2983[SIL];7-7,2979-2979[SIL];13-13,2973-2973[SIL]	((((((((.(((((.(((.(.&.).))).))))).))))))))	CCUGCACCGGCACCAGCAGCA&AGGUGCAGGUGCAGGUGCAGG	4	0.0818865
Potri.005G039100:miR482c-Known-3p-mature:904	miR482c-Known-3p-mature	Potri.005G039100	891	925	904	904	10	-43.3	-29.9	0.690531	27.5	1-7,925-919;8-13,906-901;14-22,899-891	x-x,918-907[BULt];x-x,900-900[BULt]	(((((((((.((((((............(((((((&)))))))------------))))))-)))))))))	GGUGUGGGAGGGACUUCGAGUUUACAGAGGGAAGA&UCUUUCC------------GAGUCC-UCCCAUACC	4	0.12028
Potri.005G097400:miR319c-Probable-3p-mature:821	miR319c-Probable-3p-mature	Potri.005G097400	811	831	822	821	11	-45.3	-29.5	0.651214	9	4-13,828-819;15-16,817-816;18-20,814-812	1-3,831-829[UP5];14-14,818-818[SIL];17-17,815-815[SIL];21-21,811-811[UP3]	.(((.((.((((((((((...&...)))))))))).)).))).	CGGGUGCCCCCUUCAGCUAAC&UUGGGCUGAAGGGAGCUCCCA	4	0.0818865
Potri.005G097400:miR395a-Known-5p-star:841	miR395a-Known-5p-star	Potri.005G097400	831	849	840	841	9	-39.2	-28.2	0.719388	5	1-8,849-842;10-12,840-838;15-21,837-831	9-9,841-841[SIL];13-14,x-x[BULq]	(((((((--(((.((((((((&)))))))).)))..)))))))	CAGUGAA--GCUGAAGGGAGC&GUUCCCUUGAGCACUUCACUG	4	0.0818865
Potri.005G120700:miR167g-Known-5p-mature:3076	miR167g-Known-5p-mature	Potri.005G120700	3064	3084	3076	3076	10	-39.8	-25.9	0.650754	7	2-9,3083-3076;12-15,3074-3071;17-21,3069-3065	1-1,3084-3084[UP5];10-11,3075-3075[AILq];16-16,3070-3070[SIL];22-22,3064-3064[UP3]	.(((((.((((.-((((((((.&.))))))))..)))).))))).	GAAGAUGAUGCA-GCAGCUUCG&UGAAGCUGCCAGCAUGAUCUUA	4	0.157068
Potri.005G237500:miR482a-Known-5p-star:2694	miR482a-Known-5p-star	Potri.005G237500	2683	2702	2694	2694	10	-44.3	-29.1	0.656885	11	1-7,2702-2696;10-16,2694-2688	8-9,2695-2695[AILq];17-21,2687-2683[UP3]	.....(((((((.-(((((((&)))))))..))))))).....	GCAGCUCCCCGUG-GCCCACC&GGUGGGUGAGCGGGGAAGAUA	4	0.157068
Potri.006G091500:miR394-Probable-5p-mature:33	miR394-Probable-5p-mature	Potri.006G091500	25	43	34	33	11	-39.2	-27	0.688776	9	4-16,40-28;18-20,27-25	1-3,43-41[UP5];17-17,x-x[BULq]	(((-(((((((((((((...&...))))))))))))).)))	GGA-GUGGGCAGGGUGCAAA&UUGGCAUUCUGUCCACCUCC	4	0.12028
Potri.006G132450:miR164a-Known-3p-star:1056	miR164a-Known-3p-star	Potri.006G132450	1044	1065	1056	1056	10	-40.1	-28.1	0.700748	6	1-10,1065-1056;12-15,1054-1051;17-19,1048-1046	11-11,1055-1055[SIL];16-16,1050-1049[AILt];20-21,1045-1044[UP3]	..(((..((((.((((((((((&)))))))))).))))-.)))..	UCUGGCUGAAGCAGAGCGCGUG&CACGCGCUCUUCUUC-UCCAAC	4	0.157068
Potri.006G139500:miR164d-Probable-3p-star:1082	miR164d-Probable-3p-star	Potri.006G139500	1072	1092	1083	1082	11	-45.5	-29.6	0.650549	7	2-14,1091-1079;16-19,1077-1074	1-1,1092-1092[UP5];15-15,1078-1078[SIL];20-21,1073-1072[UP3]	..((((.(((((((((((((.&.))))))))))))).))))..	CCUGGAAGAGGGGGGUAUGUC&CACGUGCUCCCCUCCUCCAAC	4	0.319178
Potri.007G007600:miR2111a-Known-3p-star:577	miR2111a-Known-3p-star	Potri.007G007600	562	585	576	577	9	-39.5	-26.3	0.665823	11.5	2-11,584-575;12-15,571-568;17-21,566-562	1-1,585-585[UP5];x-x,574-572[BULt];16-16,567-567[SIL]	(((((.((((...((((((((((.&.))))))))))---)))).)))))	GGUGAACUGCUCCAACCCGGGGGA&GUCCUUGGGUU---GCAGAUUACC	4	0.12028
Potri.007G007600:miR2111b-Known-3p-star:577	miR2111b-Known-3p-star	Potri.007G007600	562	585	576	577	9	-39.5	-26.3	0.665823	11.5	2-11,584-575;12-15,571-568;17-21,566-562	1-1,585-585[UP5];x-x,574-572[BULt];16-16,567-567[SIL]	(((((.((((...((((((((((.&.))))))))))---)))).)))))	GGUGAACUGCUCCAACCCGGGGGA&GUCCUUGGGUU---GCAGAUUACC	4	0.12028
Potri.007G020500:miR6457a-Probable-3p-star:1199	miR6457a-Probable-3p-star	Potri.007G020500	1192	1209	1200	1199	11	-33	-21.7	0.657576	10	1-10,1209-1200	11-18,1199-1192[UP3]	........((((((((((&))))))))))........	AACGUAACCCCAGCAGAG&CUCUGCUGGGAGAUUAGA	4	0.347648
Potri.007G063700:miRN8-Novel-3p-mature:809	miRN8-Novel-3p-mature	Potri.007G063700	797	817	808	809	9	-32.2	-21.3	0.661491	10.5	4-17,814-801;20-21,798-797	1-3,817-815[UP5];18-19,800-799[SIL]	((..((((((((((((((...&...))))))))))))))..))	CAGAAGAGAAUGAGGGGCGUG&UUUGCUCUUCGUUUUCUCAUG	4	0.755775
Potri.007G067700:miR169b-Probable-3p-star:347	miR169b-Probable-3p-star	Potri.007G067700	336	354	346	347	9	-38.8	-25.5	0.657216	6.5	1-5,354-350;7-19,349-337	6-6,x-x[BULq];20-20,336-336[UP3]	.(((((((((((((-(((((&))))).))))))))))))).	AGUAGCCGAAGGAG-UUGUU&GGCAGUCUCCUUUGGCUAUC	4	0.426113
Potri.007G135500:miR168a-Known-3p-star:4646	miR168a-Known-3p-star	Potri.007G135500	4634	4656	4645	4646	9	-39	-26.6	0.682051	8.5	1-4,4656-4653;5-17,4650-4638;19-21,4636-4634	x-x,4652-4651[BULt];18-18,4637-4637[SIL]	(((.(((((((((((((..((((&))))--))))))))))))).)))	AUUGGGUUGAUGUAGGGAUUGGG&CCCG--CCUUGCAUCAACUGAAU	4	0.0818865
Potri.007G135500:miR168b-Known-3p-star:4646	miR168b-Known-3p-star	Potri.007G135500	4634	4656	4645	4646	9	-39	-26.6	0.682051	8.5	1-4,4656-4653;5-17,4650-4638;19-21,4636-4634	x-x,4652-4651[BULt];18-18,4637-4637[SIL]	(((.(((((((((((((..((((&))))--))))))))))))).)))	AUUGGGUUGAUGUAGGGAUUGGG&CCCG--CCUUGCAUCAACUGAAU	4	0.0818865
Potri.007G135500:miR319b-Probable-5p-star:1171	miR319b-Probable-5p-star	Potri.007G135500	1159	1179	1170	1171	9	-33.2	-23	0.692771	6.5	1-13,1179-1167;14-16,1165-1163	x-x,1166-1166[BULt];17-20,1162-1159[UP3]	....(((.(((((((((((((&)))))))))))))-)))....	AAAAGGAUUCGAAAAGAGCUC&GAGCUUUUUUCGG-UCCACUU	4	0.226092
Potri.007G135500:miR319d-Known-3p-mature:771	miR319d-Known-3p-mature	Potri.007G135500	760	781	772	771	11	-35.2	-25.4	0.721591	8	2-5,780-777;8-14,774-768;15-20,765-760	1-1,781-781[UP5];6-7,776-775[SIL];x-x,767-766[BULt]	((((((..(((((((..((((.&.))))..)))))))--))))))	AGAGCUGCCCCUUCAUGCCAGU&UUUGGAUUGAAGGG--AGCUCU	4	0.0418176
Potri.007G135500:miR319h-Known-3p-mature:771	miR319h-Known-3p-mature	Potri.007G135500	760	781	772	771	11	-35.2	-25.4	0.721591	8	2-5,780-777;8-14,774-768;15-20,765-760	1-1,781-781[UP5];6-7,776-775[SIL];x-x,767-766[BULt]	((((((..(((((((..((((.&.))))..)))))))--))))))	AGAGCUGCCCCUUCAUGCCAGU&UUUGGAUUGAAGGG--AGCUCU	4	0.0418176
Potri.007G135500:miRN8-Novel-3p-mature:1113	miRN8-Novel-3p-mature	Potri.007G135500	1102	1122	1112	1113	9	-32.2	-21.4	0.664596	6	1-9,1122-1114;10-18,1112-1104;20-21,1103-1102	x-x,1113-1113[BULt];19-19,x-x[BULq]	((-(((((((((.(((((((((&)))))))))-))))))))).))	CA-GAGGAAACGCAAGAGUGAG&UUUGCUCUU-CGUUUUCUCAUG	4	0.710268
Potri.008G035200:miR477a-Known-5p-mature:727	miR477a-Known-5p-mature	Potri.008G035200	714	736	726	727	9	-41.2	-27.3	0.662621	9	2-7,735-730;8-11,728-725;12-12,723-723;14-19,721-716	1-1,736-736[UP5];x-x,729-729[BULt];x-x,724-724[BULt];13-13,722-722[SIL];20-21,715-714[UP3]	..((((((.(.((((.((((((.&.))))))-))))-).))))))..	GAGGAAGCGUGCUGGUGGGAGAG&AUCUCCC-UCAG-AGGCUUCCAA	4	0.258455
Potri.008G035200:miR477b-Probable-5p-mature:727	miR477b-Probable-5p-mature	Potri.008G035200	714	736	726	727	9	-41.2	-27.3	0.662621	9	2-7,735-730;8-11,728-725;12-12,723-723;14-19,721-716	1-1,736-736[UP5];x-x,729-729[BULt];x-x,724-724[BULt];13-13,722-722[SIL];20-21,715-714[UP3]	..((((((.(.((((.((((((.&.))))))-))))-).))))))..	GAGGAAGCGUGCUGGUGGGAGAG&AUCUCCC-UCAG-AGGCUUCCAA	4	0.258455
Potri.008G035200:miR477c-Known-5p-star:727	miR477c-Known-5p-star	Potri.008G035200	714	737	727	727	10	-40.8	-26.8	0.656863	10	1-8,737-730;9-11,728-726;12-12,723-723;14-19,721-716	x-x,729-729[BULt];x-x,725-724[BULt];13-13,722-722[SIL];20-21,715-714[UP3]	..((((((.(..(((.((((((((&))))))))-)))--).))))))..	GAGGAAGCGUGCUGGUGGGAGAGU&ACUCUCCC-UCA--AGGCUUCCAA	4	0.226092
Potri.008G098600:miR403a-Probable-5p-star:2550	miR403a-Probable-5p-star	Potri.008G098600	2538	2558	2549	2550	9	-31.3	-20.6	0.658147	8	1-6,2558-2553;8-17,2551-2542	7-7,2552-2552[SIL];18-21,2541-2538[UP3]	....((((((((((.((((((&)))))).))))))))))....	CAGCAGAUUCAUGUUUAAACC&GGUUUGUGCAUGAAUCUAAUA	4	0.157068
Potri.008G103000:miR164b-Probable-3p-star:1114	miR164b-Probable-3p-star	Potri.008G103000	1102	1123	1113	1114	9	-39.8	-26.2	0.658291	8	1-3,1123-1121;5-5,1119-1119;7-9,1117-1115;10-21,1113-1102	4-4,1120-1120[SIL];6-6,1118-1118[SIL];x-x,1114-1114[BULt]	((((((((((((.(((.(.(((&))).).)))-))))))))))))	GAUGAGGAAGAUGAGGAGGAUG&CAUGUGCCU-GUCUUCCUCAUC	4	0.226092
Potri.009G040500:miR396a-Probable-3p-star:3205	miR396a-Probable-3p-star	Potri.009G040500	3195	3214	3205	3205	10	-34.7	-22.6	0.651297	7.5	1-14,3214-3201;16-18,3200-3198	15-15,x-x[BULq];19-21,3197-3195[UP3]	...(((-((((((((((((((&)))))))))))))).)))...	UCGUCC-UGGUUUUCUUGGGC&GUUCAAGAAAGCCGUGGAAUA	4	0.157068
Potri.010G025500:miR6434-Known-5p-mature:996	miR6434-Known-5p-mature	Potri.010G025500	984	1007	995	996	9	-33.7	-22.7	0.673591	10	1-2,1007-1006;3-7,1004-1000;8-20,997-985	x-x,1005-1005[BULt];x-x,999-998[BULt];21-21,984-984[UP3]	.(((((((((((((..(((((.((&))-)))))--))))))))))))).	AGAUUGGUCAAGUGGUUGCAUCAG&CU-AUGUA--UGCUUGACCAAUCA	4	0.157068
Potri.010G040600:miR396a-Probable-5p-mature:1125	miR396a-Probable-5p-mature	Potri.010G040600	1114	1133	1124	1125	9	-33.4	-23.4	0.700599	5	1-6,1133-1128;8-14,1126-1120;16-21,1119-1114	7-7,1127-1127[SIL];15-15,x-x[BULq]	((((((-(((((((.((((((&)))))).))))))).))))))	AAGUUC-AGAAGGUGGUGGAA&UUCCACAGCUUUCUUGAACUU	4	0.192317
Potri.010G040600:miR396b-Known-5p-mature:1125	miR396b-Known-5p-mature	Potri.010G040600	1114	1133	1124	1125	9	-35.1	-23	0.655271	6	1-6,1133-1128;8-14,1126-1120;16-20,1119-1115	7-7,1127-1127[SIL];15-15,x-x[BULq];21-21,1114-1114[UP3]	.(((((-(((((((.((((((&)))))).))))))).))))).	AAGUUC-AGAAGGUGGUGGAA&UUCCACAGCUUUCUUGAACUG	4	0.258455
Potri.010G040600:miR396c-Probable-5p-mature:1125	miR396c-Probable-5p-mature	Potri.010G040600	1114	1133	1124	1125	9	-33.4	-23.4	0.700599	5	1-6,1133-1128;8-14,1126-1120;16-21,1119-1114	7-7,1127-1127[SIL];15-15,x-x[BULq]	((((((-(((((((.((((((&)))))).))))))).))))))	AAGUUC-AGAAGGUGGUGGAA&UUCCACAGCUUUCUUGAACUU	4	0.192317
Potri.010G040600:miR396d-Probable-5p-mature:1125	miR396d-Probable-5p-mature	Potri.010G040600	1115	1134	1125	1125	10	-34.9	-26.1	0.747851	5	1-7,1134-1128;9-15,1126-1120;17-21,1119-1115	8-8,1127-1127[SIL];16-16,x-x[BULq]	(((((-(((((((.(((((((&))))))).))))))).)))))	AGUUC-AGAAGGUGGUGGAAA&UUUCCACGGCUUUCUUGAACU	4	0.0818865
Potri.010G040600:miR396e-Probable-5p-mature:1125	miR396e-Probable-5p-mature	Potri.010G040600	1114	1133	1124	1125	9	-34.9	-26	0.744986	5	1-6,1133-1128;8-14,1126-1120;16-21,1119-1114	7-7,1127-1127[SIL];15-15,x-x[BULq]	((((((-(((((((.((((((&)))))).))))))).))))))	AAGUUC-AGAAGGUGGUGGAA&UUCCACGGCUUUCUUGAACUU	4	0.0818865
Potri.010G040600:miR396f-Known-5p-mature:1125	miR396f-Known-5p-mature	Potri.010G040600	1114	1133	1124	1125	9	-35.1	-23	0.655271	6	1-6,1133-1128;8-14,1126-1120;16-20,1119-1115	7-7,1127-1127[SIL];15-15,x-x[BULq];21-21,1114-1114[UP3]	.(((((-(((((((.((((((&)))))).))))))).))))).	AAGUUC-AGAAGGUGGUGGAA&UUCCACAGCUUUCUUGAACUG	4	0.258455
Potri.010G040600:miR396g-Known-5p-mature:1125	miR396g-Known-5p-mature	Potri.010G040600	1114	1133	1124	1125	9	-33.4	-23.4	0.700599	5	1-6,1133-1128;8-14,1126-1120;16-21,1119-1114	7-7,1127-1127[SIL];15-15,x-x[BULq]	((((((-(((((((.((((((&)))))).))))))).))))))	AAGUUC-AGAAGGUGGUGGAA&UUCCACAGCUUUCUUGAACUU	4	0.192317
Potri.010G086700:miR398a-Probable-3p-mature:254	miR398a-Probable-3p-mature	Potri.010G086700	240	268	254	254	10	-43.8	-28.7	0.655251	15	1-7,268-262;8-13,256-251;14-21,247-240	x-x,261-257[BULt];x-x,250-248[BULt]	((((((((...((((((.....(((((((&)))))))-----))))))---))))))))	UAGGGGUGGGCACCUGAUAGAUGAGCACA&UGUGUUC-----UCAGGU---CGCCCCUG	4	0.0818865
Potri.010G086700:miR398b-Known-3p-mature:254	miR398b-Known-3p-mature	Potri.010G086700	240	268	254	254	10	-43.8	-28.7	0.655251	15	1-7,268-262;8-13,256-251;14-21,247-240	x-x,261-257[BULt];x-x,250-248[BULt]	((((((((...((((((.....(((((((&)))))))-----))))))---))))))))	UAGGGGUGGGCACCUGAUAGAUGAGCACA&UGUGUUC-----UCAGGU---CGCCCCUG	4	0.0818865
Potri.010G087400:miR396a-Probable-3p-star:283	miR396a-Probable-3p-star	Potri.010G087400	272	298	283	283	10	-34.7	-23.1	0.665706	16.5	1-6,298-293;7-17,286-276	x-x,292-287[BULt];18-21,275-272[UP3]	....(((((((((((......((((((&))))))------)))))))))))....	CUACCUACGGCUUUCACAUGCUUGAAC&GUUCAA------GAAAGCCGUGGAAUA	4	0.0818865
Potri.010G102900:miR319g-Probable-3p-star:1496	miR319g-Probable-3p-star	Potri.010G102900	1484	1506	1497	1496	11	-37.1	-24.9	0.671159	8	2-5,1505-1502;7-22,1500-1485	1-1,1506-1506[UP5];6-6,1501-1501[SIL];23-23,1484-1484[UP3]	.((((((((((((((((.((((.&.)))).)))))))))))))))).	AUCCUGGGAGAUUCAGACAGAUA&GGUUUCUUUGAAUCUCUUAGGAG	4	0.12028
Potri.010G148000:miR166j-Probable-5p-star:389	miR166j-Probable-5p-star	Potri.010G148000	378	400	389	389	10	-34.2	-22.3	0.652047	11.5	1-3,400-398;5-20,394-379	4-4,397-395[AILt];21-21,378-378[UP3]	.((((((((((((((((...(((&)))--.)))))))))))))))).	UCUUGGACCAAAUGGCGGAAUCC&GGA--AUGUUGUUUGGUUCAAGG	4	0.157068
Potri.010G201100:miR319a-Known-3p-mature:1766	miR319a-Known-3p-mature	Potri.010G201100	1757	1774	1766	1766	10	-41.6	-28.8	0.692308	5.5	1-5,1774-1770;8-13,1768-1763;15-20,1762-1757	6-7,1769-1769[AILq];14-14,x-x[BULq]	((((((-((((((.-(((((&)))))..)))))).))))))	GGGGGC-CCCUUCU-UCCAA&UUGGACUGAAGGGAGCUCCC	4	0.0418176
Potri.010G201100:miR319b-Probable-3p-mature:1766	miR319b-Probable-3p-mature	Potri.010G201100	1757	1774	1766	1766	10	-41.6	-28.8	0.692308	5.5	1-5,1774-1770;8-13,1768-1763;15-20,1762-1757	6-7,1769-1769[AILq];14-14,x-x[BULq]	((((((-((((((.-(((((&)))))..)))))).))))))	GGGGGC-CCCUUCU-UCCAA&UUGGACUGAAGGGAGCUCCC	4	0.0418176
Potri.010G201100:miR319d-Known-3p-mature:1767	miR319d-Known-3p-mature	Potri.010G201100	1758	1775	1767	1767	10	-35.2	-24.2	0.6875	6	1-6,1775-1770;9-14,1768-1763;16-20,1762-1758	7-8,1769-1769[AILq];15-15,x-x[BULq]	(((((-((((((.-((((((&))))))..)))))).)))))	GGGGC-CCCUUCU-UCCAAA&UUUGGAUUGAAGGGAGCUCU	4	0.12028
Potri.010G201100:miR319g-Probable-5p-mature:1767	miR319g-Probable-5p-mature	Potri.010G201100	1758	1775	1767	1767	10	-38.5	-25.7	0.667532	6.5	2-6,1774-1770;9-14,1768-1763;16-20,1762-1758	1-1,1775-1775[UP5];7-8,1769-1769[AILq];15-15,x-x[BULq]	(((((-((((((.-(((((.&.)))))..)))))).)))))	GGGGC-CCCUUCU-UCCAAA&CUUGGAUUGAAGGGAGCUCC	4	0.0818865
Potri.010G201100:miR319h-Known-3p-mature:1767	miR319h-Known-3p-mature	Potri.010G201100	1758	1775	1767	1767	10	-35.2	-24.2	0.6875	6	1-6,1775-1770;9-14,1768-1763;16-20,1762-1758	7-8,1769-1769[AILq];15-15,x-x[BULq]	(((((-((((((.-((((((&))))))..)))))).)))))	GGGGC-CCCUUCU-UCCAAA&UUUGGAUUGAAGGGAGCUCU	4	0.12028
Potri.010G201100:miR319j-Probable-3p-mature:1766	miR319j-Probable-3p-mature	Potri.010G201100	1757	1774	1766	1766	10	-41.6	-28.8	0.692308	5.5	1-5,1774-1770;8-13,1768-1763;15-20,1762-1757	6-7,1769-1769[AILq];14-14,x-x[BULq]	((((((-((((((.-(((((&)))))..)))))).))))))	GGGGGC-CCCUUCU-UCCAA&UUGGACUGAAGGGAGCUCCC	4	0.0418176
Potri.011G006800:miR396d-Probable-5p-mature:70	miR396d-Probable-5p-mature	Potri.011G006800	59	79	70	70	10	-34.9	-23.2	0.664756	8.5	2-17,78-63	1-1,79-79[UP5];18-21,62-59[UP3]	....((((((((((((((((.&.))))))))))))))))....	CUGAUAAGAAGGCUGUGGGAC&UUUCCACGGCUUUCUUGAACU	4	0.401067
Potri.011G031900:miR167c-Probable-3p-star:1354	miR167c-Probable-3p-star	Potri.011G031900	1345	1362	1355	1354	11	-32.3	-22.4	0.693498	6.5	1-5,1362-1358;8-14,1357-1351;16-20,1349-1345	6-7,x-x[BULq];15-15,1350-1350[SIL]	(((((.(((((((--(((((&)))))..))))))).)))))	GAUGAUGCUGCCA--UGAUC&GAUCAUGUGGUAGUUUCAUC	4	0.192317
Potri.011G031900:miR472a-Probable-5p-mature:309	miR472a-Probable-5p-mature	Potri.011G031900	295	316	308	309	9	-41.7	-27.4	0.657074	7.5	1-4,316-313;6-18,312-300;19-21,297-295	5-5,x-x[BULq];x-x,299-298[BULt]	(((..(((((((((((((-((((&)))).)))))))))))))--)))	GGUUUUUCAGGUCCACGC-CGGA&UUUGUGCGUGGAUCUGAG--GCC	4	0.12028
Potri.011G042500:miR319b-Probable-5p-star:310	miR319b-Probable-5p-star	Potri.011G042500	300	319	310	310	10	-33.2	-22.3	0.671687	10	1-8,319-312;10-12,310-308;15-18,305-302	9-9,311-311[SIL];13-14,307-306[SIL];19-20,301-300[UP3]	..((((..(((.((((((((&)))))))).)))..))))..	AUGUGGUACGGUGGAGGCUC&GAGCUUUUUUCGGUCCACUU	4	0.401067
Potri.012G005500:miR169b-Probable-3p-star:1242	miR169b-Probable-3p-star	Potri.012G005500	1233	1254	1243	1242	11	-38.8	-25.9	0.667526	10	1-4,1254-1251;6-9,1249-1246;10-17,1243-1236	5-5,1250-1250[SIL];x-x,1245-1244[BULt];18-20,1235-1233[UP3]	...((((((((..((((.((((&)))).))))--))))))))...	UAAAGCCAAGGAUGAGAGUGCC&GGCAGUCUC--CUUUGGCUAUC	4	0.289465
Potri.013G003100:miRN8-Novel-3p-mature:678	miRN8-Novel-3p-mature	Potri.013G003100	667	686	677	678	9	-32.2	-21.1	0.65528	7	1-10,686-677;12-14,675-673;17-21,671-667	11-11,676-676[SIL];15-16,672-672[AILq]	(((((.-(((.((((((((((&)))))))))).)))..)))))	CGUGAU-AGAGGGAGAGCGAA&UUUGCUCUUCGUUUUCUCAUG	4	0.775774
Potri.013G003200:miR396e-Probable-5p-mature:1867	miR396e-Probable-5p-mature	Potri.013G003200	1857	1878	1868	1867	11	-34.9	-23.3	0.667622	9	1-3,1878-1876;4-17,1874-1861	x-x,1875-1875[BULt];18-21,1860-1857[UP3]	....((((((((((((((.(((&)))-))))))))))))))....	AAACUCAAGAGGGUCGUGUGAA&UUC-CACGGCUUUCUUGAACUU	4	0.226092
Potri.013G119700:miR164d-Probable-3p-star:1331	miR164d-Probable-3p-star	Potri.013G119700	1320	1341	1332	1331	11	-45.5	-29.8	0.654945	10.5	3-5,1339-1337;7-10,1335-1332;11-18,1330-1323	1-2,1341-1340[UP5];6-6,1336-1336[SIL];x-x,1331-1331[BULt];19-21,1322-1320[UP3]	...((((((((.((((.(((..&..))).))))-))))))))...	GGAGGAGGGGGAGGAGGACGAA&CACGUGCUCC-CCUCCUCCAAC	4	0.289465
Potri.013G119700:miR394-Probable-5p-mature:283	miR394-Probable-5p-mature	Potri.013G119700	274	294	284	283	11	-39.2	-27.7	0.706633	10.5	4-5,291-290;7-20,287-274	1-3,294-292[UP5];6-6,289-288[AILt]	((((((((((((((..((...&...))-.))))))))))))))	GGGGGUGGACGGAAAAGCAGG&UUGGC-AUUCUGUCCACCUCC	4	0.0818865
Potri.013G159500:miR171b-Known-5p-star:2386	miR171b-Known-5p-star	Potri.013G159500	2374	2397	2386	2386	10	-40.9	-29.6	0.723716	7	1-5,2397-2393;6-8,2391-2389;9-17,2387-2379;19-22,2377-2374	x-x,2392-2392[BULt];x-x,2388-2388[BULt];18-18,2378-2378[SIL]	((((.(((((((((.(((.(((((&)))))-)))-))))))))).))))	GAUGUGCCGGGUCAUAUAUCCACG&CGUGG-UAU-UGAUCCGGUUCGUC	4	0.0418176
Potri.013G159500:miR477c-Known-3p-mature:1148	miR477c-Known-3p-mature	Potri.013G159500	1136	1169	1148	1148	10	-47.8	-31.1	0.650628	28	1-7,1169-1163;8-18,1150-1140;20-22,1138-1136	x-x,1162-1151[BULt];19-19,1139-1139[SIL]	(((.(((((((((((............(((((((&)))))))------------))))))))))).)))	CCAGUCUCCCUCAGAAUGUCACGCUAUGGCUUCA&UGAGGCC------------UUUGGGGGAGAGUGG	4	0.192317
Potri.014G038000:miRN8-Novel-3p-mature:495	miRN8-Novel-3p-mature	Potri.014G038000	485	509	496	495	11	-32.2	-21	0.652174	16.5	3-8,507-502;9-18,497-488	1-2,509-508[UP5];x-x,501-498[BULt];19-21,487-485[UP3]	...((((((((((....((((((..&..))))))----))))))))))...	UACGAGAGAGCGAGGUAAGGGCAUU&UUUGCUCU----UCGUUUUCUCAUG	4	0.810993
Potri.014G139500:miRN8-Novel-3p-mature:1119	miRN8-Novel-3p-mature	Potri.014G139500	1109	1135	1120	1119	11	-32.2	-22.1	0.686335	16.5	1-8,1135-1128;9-18,1121-1112	x-x,1127-1122[BULt];19-21,1111-1109[UP3]	...((((((((((......((((((((&))))))))------))))))))))...	GUGGAGGAAACGAUGAAAGAGAGCAGA&UUUGCUCU------UCGUUUUCUCAUG	4	0.374928
Potri.014G169400:miR472b-Known-3p-mature:1624	miR472b-Known-3p-mature	Potri.014G169400	1610	1633	1624	1624	10	-43.3	-28.5	0.658199	7.5	2-11,1632-1623;12-12,1621-1621;14-16,1619-1617;17-22,1615-1610	1-1,1633-1633[UP5];x-x,1622-1622[BULt];13-13,1620-1620[SIL];x-x,1616-1616[BULt]	((((((.(((.(.((((((((((.&.))))))))))-).)))-))))))	GGGGUGAGGUUGUAGUUGGGGGAU&UUUUCCCAACU-CCACC-CAUCCC	4	0.258455
Potri.015G071200:miR477a-Known-5p-mature:1463	miR477a-Known-5p-mature	Potri.015G071200	1453	1472	1463	1463	10	-41.2	-28.4	0.68932	6	1-11,1472-1462;14-20,1460-1454	12-13,1461-1461[AILq];21-21,1453-1453[UP3]	.(((((((.-(((((((((((&)))))))))))..))))))).	GUGGAGGUG-UUGAGGGAGAU&AUCUCCCUCAGAGGCUUCCAA	4	0.157068
Potri.015G071200:miR477b-Probable-5p-mature:1463	miR477b-Probable-5p-mature	Potri.015G071200	1453	1472	1463	1463	10	-41.2	-28.4	0.68932	6	1-11,1472-1462;14-20,1460-1454	12-13,1461-1461[AILq];21-21,1453-1453[UP3]	.(((((((.-(((((((((((&)))))))))))..))))))).	GUGGAGGUG-UUGAGGGAGAU&AUCUCCCUCAGAGGCUUCCAA	4	0.157068
Potri.015G071200:miR477c-Known-5p-star:1464	miR477c-Known-5p-star	Potri.015G071200	1453	1473	1464	1464	10	-40.8	-31.2	0.764706	6	3-12,1471-1462;14-20,1460-1454	1-2,1473-1472[UP5];13-13,1461-1461[SIL];21-21,1453-1453[UP3]	.(((((((.((((((((((..&..)))))))))).))))))).	GUGGAGGUGUUGAGGGAGAUU&ACUCUCCCUCAAGGCUUCCAA	4	0.0418176
Potri.015G103000:miR319g-Probable-5p-mature:3166	miR319g-Probable-5p-mature	Potri.015G103000	3155	3171	3165	3166	9	-38.5	-25.12	0.652468	11.5	1-3,3171-3169;9-20,3166-3155	4-8,3168-3167[AILq]	((((((((((((..---(((&))).....))))))))))))	GGGGCUCCCUUCUA---GAG&CUUGGAUUGAAGGGAGCUCC	4	0.226092
Potri.015G129000:miR166i-Known-5p-star:67	miR166i-Known-5p-star	Potri.015G129000	53	75	67	67	10	-37.7	-24.9	0.660477	8	1-4,75-72;6-16,71-61;17-20,57-54	5-5,x-x[BULq];x-x,60-58[BULt];21-21,53-53[UP3]	.((((...(((((((((((-((((&)))).)))))))))))---)))).	CCUCGCUUGAUCAGGCAGC-UUCU&GGAAUGCUGUCUGAUU---CGAGA	4	0.157068
Potri.017G058200:miRN8-Novel-3p-mature:869	miRN8-Novel-3p-mature	Potri.017G058200	858	883	869	869	10	-32.2	-21.6	0.670807	18	1-8,883-876;9-18,870-861	x-x,875-871[BULt];19-21,860-858[UP3]	...((((((((((.....((((((((&))))))))-----))))))))))...	GGAGAGGGAGCGAGAAUGGGAGCGGA&UUUGCUCU-----UCGUUUUCUCAUG	4	0.65628
Potri.017G069300:miR1446b-Probable-3p-star:712	miR1446b-Probable-3p-star	Potri.017G069300	700	720	711	712	9	-39.8	-29	0.728643	9	3-17,718-704	1-2,720-719[UP5];18-21,703-700[UP3]	....(((((((((((((((..&..)))))))))))))))....	AAUGCUGAGCCUCCUACUUGG&CAAGGUGGGAGGCUCAGAAAA	4	0.0418176
Potri.017G073200:miR395a-Known-5p-star:765	miR395a-Known-5p-star	Potri.017G073200	749	774	765	765	10	-39.2	-26.8	0.683673	15.5	2-10,773-765;11-20,759-750	1-1,774-774[UP5];x-x,764-760[BULt];21-21,749-749[UP3]	.((((((((((.....(((((((((.&.)))))))))-----)))))))))).	GAGUGGAGUGUGGAUUUCAGGGGAGA&GUUCCCUUGA-----GCACUUCACUG	4	0.157068
Potri.017G073200:miR395b-Probable-5p-star:765	miR395b-Probable-5p-star	Potri.017G073200	749	774	765	765	10	-37.2	-24.2	0.650538	16	2-10,773-765;11-20,759-750	1-1,774-774[UP5];x-x,764-760[BULt];21-21,749-749[UP3]	.((((((((((.....(((((((((.&.)))))))))-----)))))))))).	GAGUGGAGUGUGGAUUUCAGGGGAGA&GUUCCUCUGA-----GCACUUCAUUG	4	0.226092
Potri.017G073200:miR395c-Probable-5p-star:765	miR395c-Probable-5p-star	Potri.017G073200	749	774	765	765	10	-39.5	-26.5	0.670886	15.5	2-10,773-765;11-20,759-750	1-1,774-774[UP5];x-x,764-760[BULt];21-21,749-749[UP3]	.((((((((((.....(((((((((.&.)))))))))-----)))))))))).	GAGUGGAGUGUGGAUUUCAGGGGAGA&GUUCCUCUGA-----GCACUUCACUG	4	0.12028
Potri.017G073200:miR395e-Probable-5p-star:765	miR395e-Probable-5p-star	Potri.017G073200	749	774	765	765	10	-37.2	-24.2	0.650538	16	2-10,773-765;11-20,759-750	1-1,774-774[UP5];x-x,764-760[BULt];21-21,749-749[UP3]	.((((((((((.....(((((((((.&.)))))))))-----)))))))))).	GAGUGGAGUGUGGAUUUCAGGGGAGA&GUUCCUCUGA-----GCACUUCAUUG	4	0.226092
Potri.019G018100:miR319b-Probable-5p-star:441	miR319b-Probable-5p-star	Potri.019G018100	430	450	441	441	10	-33.2	-21.9	0.659639	8.5	2-7,449-444;9-17,442-434;18-20,432-430	1-1,450-450[UP5];8-8,443-443[SIL];x-x,433-433[BULt]	(((.(((((((((.((((((.&.)))))).)))))))))-)))	GAGAUGGACCGGGUGAAGUUG&GAGCUUUUUUCGGUCCA-CUU	4	0.516252
Potri.019G021200:miR475a-Probable-3p-star:515	miR475a-Probable-3p-star	Potri.019G021200	503	526	514	515	9	-35.9	-30.3	0.844011	7.5	1-5,526-522;6-21,518-503	x-x,521-519[BULt]	((((((((((((((((...(((((&)))))---))))))))))))))))	UCAAUGGGCUCUGUAAAGCGGGUG&CACUC---UUACAGAGUCCAUUGA	4	0.0418176
Potri.019G117500:miR167e-Probable-3p-star:89	miR167e-Probable-3p-star	Potri.019G117500	80	101	90	89	11	-34.3	-22.7	0.661808	9.5	1-4,101-98;7-9,94-92;10-20,90-80	5-6,97-95[AILt];x-x,91-91[BULt]	(((((((((((.(((...((((&))))-..)))-)))))))))))	GGUGGAACUACACAUUGAGAUC&GAUC-AUGUG-GUAGUUUCACC	4	0.192317
Potri.019G129400:miR7817-Known-3p-star:2070	miR7817-Known-3p-star	Potri.019G129400	2059	2079	2070	2070	10	-31.7	-21.8	0.687697	8	1-4,2079-2076;7-17,2073-2063;20-21,2060-2059	5-6,2075-2074[SIL];18-19,2062-2061[SIL]	((..(((((((((((..((((&))))..)))))))))))..))	CGGGUGGUUGCUGUGAAGAAA&UUUCGAUACAGUAACCAAACG	4	0.0818865
